# Supplementary material
Source: publisher figshare collection journal article supplement (https://tandf.figshare.com/articles/dataset/_/3464246)
Supplement: Supplementary file 1 [file 1]

**Table S3.** Pairwise Tanimoto coefficients for 84 agents<sup>[a]</sup>.

| Agent 1       | Agent 2        | Tanimoto |
|---------------|----------------|----------|
| Diclofenac    | Nitrendipine   | 0.64     |
| Mesalazine    | Metformin      | 0.63     |
| Metformin     | Verapamil      | 0.59     |
| Paclitaxel    | Pimozide       | 0.59     |
| Amitriptyline | Imipramine     | 0.59     |
| Diclofenac    | Mesalazine     | 0.56     |
| Estradiol     | Prednisone     | 0.56     |
| Diclofenac    | Metformin      | 0.55     |
| Astemizole    | Terfenadine    | 0.55     |
| Metformin     | Nitrendipine   | 0.55     |
| Astemizole    | Pimozide       | 0.53     |
| Danazol       | Mesalazine     | 0.53     |
| Prednisone    | Theophylline   | 0.53     |
| Celastrol     | Pimozide       | 0.53     |
| Mesalazine    | Paclitaxel     | 0.53     |
| Pimozide      | Terfenadine    | 0.53     |
| Finasteride   | Imatinib       | 0.53     |
| Astemizole    | Clomipramine   | 0.52     |
| Celastrol     | Terfenadine    | 0.50     |
| Clomipramine  | Verapamil      | 0.50     |
| Danazol       | Diclofenac     | 0.50     |
| Folic Acid    | Pentoxifylline | 0.50     |
| Raloxifene    | Tamoxifen      | 0.50     |
| Metformin     | Paclitaxel     | 0.49     |
| Danazol       | Metformin      | 0.48     |
| Danazol       | Felodipine     | 0.48     |
| Astemizole    | Tamoxifen      | 0.48     |
| Estradiol     | Haloperidol    | 0.48     |
| Fluvoxamine   | Raloxifene     | 0.47     |
| Paclitaxel    | Terfenadine    | 0.47     |
| Dexamethasone | Doxorubicin    | 0.47     |
| Doxorubicin   | Methotrexate   | 0.47     |
| Fluoxetine    | Terfenadine    | 0.47     |
| Celastrol     | Felodipine     | 0.47     |
| Astemizole    | Felodipine     | 0.46     |
| Clenbuterol   | Testosterone   | 0.46     |
| Clomipramine  | Pimozide       | 0.46     |
| Clozapine     | Haloperidol    | 0.45     |
| Finasteride   | Tamoxifen      | 0.45     |
| Danazol       | Nitrendipine   | 0.45     |

|                   |                |      |
|-------------------|----------------|------|
| Irinotecan        | Metformin      | 0.45 |
| Mesalazine        | Nitrendipine   | 0.45 |
| Diclofenac        | Felodipine     | 0.44 |
| Felodipine        | Irinotecan     | 0.44 |
| Meclofenamic Acid | Pentoxifylline | 0.44 |
| Meclofenamic Acid | Primidone      | 0.44 |
| Clomipramine      | Danazol        | 0.44 |
| Haloperidol       | Tamoxifen      | 0.44 |
| Celastrol         | Nitrendipine   | 0.44 |
| Cimetidine        | Etidronic Acid | 0.44 |
| Clomipramine      | Felodipine     | 0.44 |
| Ergocalciferol    | Primidone      | 0.44 |
| Estradiol         | Theophylline   | 0.44 |
| Felodipine        | Metformin      | 0.44 |
| Fluoxetine        | Paclitaxel     | 0.44 |
| Astemizole        | Miconazole     | 0.43 |
| Cisapride         | Imatinib       | 0.43 |
| Celastrol         | Irinotecan     | 0.43 |
| Clomipramine      | Terfenadine    | 0.43 |
| Celastrol         | Clomipramine   | 0.43 |
| Celastrol         | Paclitaxel     | 0.43 |
| Chloroquine       | Dapsone        | 0.43 |
| Chloroquine       | Hydrocortisone | 0.43 |
| Cisapride         | Finasteride    | 0.43 |
| Domperidone       | Haloperidol    | 0.43 |
| Imatinib          | Prednisone     | 0.43 |
| Irinotecan        | Trazodone      | 0.43 |
| Pimozide          | Verapamil      | 0.43 |
| Propranolol       | Saquinavir     | 0.43 |
| Celastrol         | Danazol        | 0.42 |
| Celastrol         | Mesalazine     | 0.42 |
| Felodipine        | Terfenadine    | 0.42 |
| Nitrendipine      | Verapamil      | 0.42 |
| Amitriptyline     | Fluoxetine     | 0.42 |
| Domperidone       | Estradiol      | 0.42 |
| Doxorubicin       | Sirolimus      | 0.42 |
| Finasteride       | Raloxifene     | 0.42 |
| Celastrol         | Nifedipine     | 0.42 |
| Amrinone          | Risperidone    | 0.42 |
| Buspirone         | Carisoprodol   | 0.42 |
| Doxycycline       | Lidocaine      | 0.42 |
| Doxycycline       | Theophylline   | 0.42 |
| Ergocalciferol    | Sulfasalazine  | 0.42 |

|                 |                    |      |
|-----------------|--------------------|------|
| Metformin       | Pimozide           | 0.42 |
| Chloramphenicol | Metformin          | 0.41 |
| Mesalazine      | Pimozide           | 0.41 |
| Cisapride       | Estradiol          | 0.41 |
| Fluvoxamine     | Haloperidol        | 0.41 |
| Haloperidol     | Prednisone         | 0.41 |
| Haloperidol     | Raloxifene         | 0.41 |
| Diclofenac      | Irinotecan         | 0.41 |
| Astemizole      | Celastrol          | 0.41 |
| Felodipine      | Pimozide           | 0.41 |
| Clomipramine    | Metformin          | 0.41 |
| Clomipramine    | Paclitaxel         | 0.41 |
| Terfenadine     | Verapamil          | 0.41 |
| Astemizole      | Raloxifene         | 0.40 |
| Celecoxib       | Estradiol          | 0.40 |
| Citalopram      | Tolbutamide        | 0.40 |
| Danazol         | Paclitaxel         | 0.40 |
| Imatinib        | Tamoxifen          | 0.40 |
| Irinotecan      | Mesalazine         | 0.40 |
| Lovastatin      | Simvastatin        | 0.40 |
| Prednisone      | Raloxifene         | 0.40 |
| Progesterone    | Verapamil          | 0.40 |
| Metformin       | Terfenadine        | 0.39 |
| Astemizole      | Verapamil          | 0.39 |
| Felodipine      | Paclitaxel         | 0.39 |
| Amitriptyline   | Clozapine          | 0.39 |
| Fluoxetine      | Miconazole         | 0.39 |
| Celastrol       | Metformin          | 0.39 |
| Clozapine       | Imipramine         | 0.39 |
| Diltiazem       | Meclofenamic Acid  | 0.39 |
| Minocycline     | Sirolimus          | 0.39 |
| Celastrol       | Diclofenac         | 0.39 |
| Felodipine      | Mesalazine         | 0.39 |
| Amitriptyline   | Tamoxifen          | 0.38 |
| Cimetidine      | Diethylcarbamazine | 0.38 |
| Erythromycin    | Saquinavir         | 0.38 |
| Lansoprazole    | Pentoxifylline     | 0.38 |
| Primidone       | Sulfasalazine      | 0.38 |
| Cisapride       | Pentoxifylline     | 0.38 |
| Cisapride       | Primidone          | 0.38 |
| Mesalazine      | Progesterone       | 0.38 |
| Carisoprodol    | Nitrendipine       | 0.38 |
| Chloroquine     | Thalidomide        | 0.38 |

|                   |                |      |
|-------------------|----------------|------|
| Cimetidine        | Probenecid     | 0.38 |
| Cisapride         | Lovastatin     | 0.38 |
| Diclofenac        | Verapamil      | 0.38 |
| Doxycycline       | Estradiol      | 0.38 |
| Doxycycline       | Prednisone     | 0.38 |
| Hydrocortisone    | Thalidomide    | 0.38 |
| Irinotecan        | Verapamil      | 0.38 |
| Meclofenamic Acid | Topiramate     | 0.38 |
| Mesalazine        | Probenecid     | 0.38 |
| Ondansetron       | Tolbutamide    | 0.38 |
| Clomipramine      | Nitrendipine   | 0.37 |
| Mesalazine        | Verapamil      | 0.37 |
| Amitriptyline     | Nifedipine     | 0.37 |
| Chloramphenicol   | Nitrendipine   | 0.37 |
| Doxorubicin       | Verapamil      | 0.37 |
| Fluoxetine        | Haloperidol    | 0.37 |
| Meclofenamic Acid | Mesalazine     | 0.37 |
| Miconazole        | Pimozide       | 0.37 |
| Leflunomide       | Lovastatin     | 0.37 |
| Clomipramine      | Sirolimus      | 0.37 |
| Irinotecan        | Nitrendipine   | 0.37 |
| Raloxifene        | Terfenadine    | 0.37 |
| Clomipramine      | Irinotecan     | 0.36 |
| Diclofenac        | Ergocalciferol | 0.36 |
| Diclofenac        | Paclitaxel     | 0.36 |
| Estradiol         | Imatinib       | 0.36 |
| Fluoxetine        | Pimozide       | 0.36 |
| Fluoxetine        | Propranolol    | 0.36 |
| Fluvoxamine       | Imatinib       | 0.36 |
| Imatinib          | Raloxifene     | 0.36 |
| Irinotecan        | Paclitaxel     | 0.36 |
| Leflunomide       | Mephenytoin    | 0.36 |
| Amitriptyline     | Haloperidol    | 0.36 |
| Chloramphenicol   | Diclofenac     | 0.36 |
| Clozapine         | Tamoxifen      | 0.36 |
| Amitriptyline     | Astemizole     | 0.36 |
| Astemizole        | Haloperidol    | 0.36 |
| Chloramphenicol   | Danazol        | 0.36 |
| Clomipramine      | Miconazole     | 0.36 |
| Dexamethasone     | Risperidone    | 0.36 |
| Folic Acid        | Minocycline    | 0.36 |
| Amitriptyline     | Pimozide       | 0.35 |
| Felodipine        | Nitrendipine   | 0.35 |

|                  |                   |      |
|------------------|-------------------|------|
| Carisoprodol     | Primidone         | 0.35 |
| Cimetidine       | Proguanil         | 0.35 |
| Clomipramine     | Fluoxetine        | 0.35 |
| Clomipramine     | Nifedipine        | 0.35 |
| Finasteride      | Minocycline       | 0.35 |
| Irinotecan       | Terfenadine       | 0.35 |
| Primidone        | Proguanil         | 0.35 |
| Tamoxifen        | Terfenadine       | 0.35 |
| Danazol          | Terfenadine       | 0.35 |
| Mesalazine       | Terfenadine       | 0.35 |
| Chloramphenicol  | Cimetidine        | 0.35 |
| Finasteride      | Fluvoxamine       | 0.35 |
| Finasteride      | Prednisone        | 0.35 |
| Haloperidol      | Imipramine        | 0.35 |
| Celecoxib        | Cisapride         | 0.35 |
| Celecoxib        | Haloperidol       | 0.35 |
| Cisapride        | Fluvoxamine       | 0.35 |
| Cisapride        | Prednisone        | 0.35 |
| Lovastatin       | Sirolimus         | 0.35 |
| Miconazole       | Tamoxifen         | 0.35 |
| Simvastatin      | Tamoxifen         | 0.35 |
| Dextromethorphan | Pimozide          | 0.35 |
| Felodipine       | Sirolimus         | 0.35 |
| Lovastatin       | Tamoxifen         | 0.35 |
| Clomipramine     | Methotrexate      | 0.34 |
| Miconazole       | Terfenadine       | 0.34 |
| Nifedipine       | Tamoxifen         | 0.34 |
| Amitriptyline    | Clomipramine      | 0.34 |
| Clomipramine     | Haloperidol       | 0.34 |
| Lovastatin       | Terfenadine       | 0.34 |
| Nitrendipine     | Pimozide          | 0.34 |
| Paclitaxel       | Verapamil         | 0.34 |
| Amitriptyline    | Terfenadine       | 0.33 |
| Amoxicillin      | Propranolol       | 0.33 |
| Amoxicillin      | Saquinavir        | 0.33 |
| Buspirone        | Imipramine        | 0.33 |
| Carbamazepine    | Doxycycline       | 0.33 |
| Carbamazepine    | Miconazole        | 0.33 |
| Celecoxib        | Fluvoxamine       | 0.33 |
| Celecoxib        | Meclofenamic Acid | 0.33 |
| Chloroquine      | Etidronic Acid    | 0.33 |
| Cisapride        | Ergocalciferol    | 0.33 |
| Citalopram       | Mimosine          | 0.33 |

|                    |                   |      |
|--------------------|-------------------|------|
| Citalopram         | Tamoxifen         | 0.33 |
| Clomipramine       | Fluvoxamine       | 0.33 |
| Clozapine          | Verapamil         | 0.33 |
| Dexamethasone      | Irinotecan        | 0.33 |
| Dextromethorphan   | Propranolol       | 0.33 |
| Diclofenac         | Pimozide          | 0.33 |
| Diethylcarbamazine | Ondansetron       | 0.33 |
| Diethylcarbamazine | Saquinavir        | 0.33 |
| Ergocalciferol     | Quinidine         | 0.33 |
| Estradiol          | Fluvoxamine       | 0.33 |
| Estradiol          | Raloxifene        | 0.33 |
| Felodipine         | Miconazole        | 0.33 |
| Felodipine         | Nifedipine        | 0.33 |
| Fluoxetine         | Imatinib          | 0.33 |
| Fluoxetine         | Lovastatin        | 0.33 |
| Fluvoxamine        | Meclofenamic Acid | 0.33 |
| Fluvoxamine        | Prednisone        | 0.33 |
| Imatinib           | Lovastatin        | 0.33 |
| Imipramine         | Ketoconazole      | 0.33 |
| Irinotecan         | Methotrexate      | 0.33 |
| Irinotecan         | Pimozide          | 0.33 |
| Leflunomide        | Probenecid        | 0.33 |
| Meclofenamic Acid  | Paclitaxel        | 0.33 |
| Meclofenamic Acid  | Probenecid        | 0.33 |
| Methotrexate       | Sirolimus         | 0.33 |
| Miconazole         | Simvastatin       | 0.33 |
| Nitrendipine       | Paclitaxel        | 0.33 |
| Pentoxifylline     | Primidone         | 0.33 |
| Pimozide           | Tamoxifen         | 0.33 |
| Primidone          | Topiramate        | 0.33 |
| Progesterone       | Trazodone         | 0.33 |
| Celastrol          | Verapamil         | 0.32 |
| Clomipramine       | Diclofenac        | 0.32 |
| Clomipramine       | Tamoxifen         | 0.32 |
| Felodipine         | Verapamil         | 0.32 |
| Amitriptyline      | Celastrol         | 0.32 |
| Astemizole         | Fluoxetine        | 0.32 |
| Astemizole         | Nifedipine        | 0.32 |
| Celastrol          | Progesterone      | 0.32 |
| Clomipramine       | Clozapine         | 0.32 |
| Lovastatin         | Pimozide          | 0.32 |
| Clozapine          | Nitrendipine      | 0.32 |
| Diltiazem          | Paclitaxel        | 0.32 |

|                  |                |      |
|------------------|----------------|------|
| Fluoxetine       | Progesterone   | 0.32 |
| Haloperidol      | Nifedipine     | 0.32 |
| Pimozide         | Simvastatin    | 0.32 |
| Dexamethasone    | Nifedipine     | 0.32 |
| Ergocalciferol   | Nitrendipine   | 0.32 |
| Estradiol        | Tamoxifen      | 0.32 |
| Fluoxetine       | Methotrexate   | 0.32 |
| Fluvoxamine      | Tamoxifen      | 0.32 |
| Haloperidol      | Imatinib       | 0.32 |
| Prednisone       | Tamoxifen      | 0.32 |
| Clozapine        | Fluvoxamine    | 0.32 |
| Clozapine        | Raloxifene     | 0.32 |
| Domperidone      | Imatinib       | 0.32 |
| Finasteride      | Lovastatin     | 0.32 |
| Imipramine       | Tamoxifen      | 0.32 |
| Ketoconazole     | Tamoxifen      | 0.32 |
| Leflunomide      | Tamoxifen      | 0.32 |
| Raloxifene       | Sirolimus      | 0.32 |
| Dexamethasone    | Simvastatin    | 0.32 |
| Doxycycline      | Haloperidol    | 0.32 |
| Estradiol        | Etidronic Acid | 0.32 |
| Finasteride      | Pentoxifylline | 0.32 |
| Folic Acid       | Imatinib       | 0.32 |
| Imatinib         | Theophylline   | 0.32 |
| Pentoxifylline   | Quinidine      | 0.32 |
| Primidone        | Quinidine      | 0.32 |
| Amoxicillin      | Etidronic Acid | 0.31 |
| Amoxicillin      | Proguanil      | 0.31 |
| Danazol          | Irinotecan     | 0.31 |
| Dextromethorphan | Trazodone      | 0.31 |
| Diltiazem        | Probenecid     | 0.31 |
| Finasteride      | Topiramate     | 0.31 |
| Probenecid       | Proguanil      | 0.31 |
| Chloramphenicol  | Mesalazine     | 0.31 |
| Cimetidine       | Metformin      | 0.31 |
| Clomipramine     | Doxorubicin    | 0.31 |
| Methotrexate     | Verapamil      | 0.31 |
| Astemizole       | Domperidone    | 0.31 |
| Astemizole       | Methotrexate   | 0.31 |
| Buspirone        | Ergocalciferol | 0.31 |
| Carbamazepine    | Theophylline   | 0.31 |
| Cimetidine       | Nitrendipine   | 0.31 |
| Cisapride        | Haloperidol    | 0.31 |

|                  |                |      |
|------------------|----------------|------|
| Danazol          | Diltiazem      | 0.31 |
| Danazol          | Testosterone   | 0.31 |
| Dapsone          | Pentoxifylline | 0.31 |
| Diltiazem        | Mesalazine     | 0.31 |
| Doxycycline      | Folic Acid     | 0.31 |
| Ergocalciferol   | Mesalazine     | 0.31 |
| Hydrocortisone   | Pentoxifylline | 0.31 |
| Quinidine        | Triflusal      | 0.31 |
| Risperidone      | Testosterone   | 0.31 |
| Astemizole       | Paclitaxel     | 0.31 |
| Nifedipine       | Terfenadine    | 0.31 |
| Carisoprodol     | Diclofenac     | 0.30 |
| Celecoxib        | Imatinib       | 0.30 |
| Chloramphenicol  | Clozapine      | 0.30 |
| Dexamethasone    | Progesterone   | 0.30 |
| Dextromethorphan | Fluoxetine     | 0.30 |
| Finasteride      | Haloperidol    | 0.30 |
| Lovastatin       | Raloxifene     | 0.30 |
| Danazol          | Fluoxetine     | 0.30 |
| Imatinib         | Terfenadine    | 0.30 |
| Metformin        | Progesterone   | 0.30 |
| Carisoprodol     | Clozapine      | 0.30 |
| Celastrol        | Clozapine      | 0.30 |
| Chloroquine      | Erythromycin   | 0.30 |
| Cisapride        | Folic Acid     | 0.30 |
| Clomipramine     | Dexamethasone  | 0.30 |
| Diclofenac       | Nifedipine     | 0.30 |
| Fluoxetine       | Tamoxifen      | 0.30 |
| Fluvoxamine      | Verapamil      | 0.30 |
| Haloperidol      | Theophylline   | 0.30 |
| Irinotecan       | Nifedipine     | 0.30 |
| Miconazole       | Raloxifene     | 0.30 |
| Mimosine         | Ondansetron    | 0.30 |
| Nitrendipine     | Progesterone   | 0.30 |
| Prednisone       | Simvastatin    | 0.30 |
| Danazol          | Pimozide       | 0.30 |
| Danazol          | Verapamil      | 0.30 |
| Amoxicillin      | Verapamil      | 0.30 |
| Astemizole       | Fluvoxamine    | 0.30 |
| Cimetidine       | Mesalazine     | 0.30 |
| Mesalazine       | Primidone      | 0.30 |
| Mesalazine       | Valproic Acid  | 0.30 |
| Nitrendipine     | Quinidine      | 0.30 |



|                   |                   |      |
|-------------------|-------------------|------|
| Propranolol       | Verapamil         | 0.30 |
| Astemizole        | Danazol           | 0.29 |
| Carbamazepine     | Estradiol         | 0.29 |
| Carbamazepine     | Prednisone        | 0.29 |
| Carisoprodol      | Ergocalciferol    | 0.29 |
| Celastrol         | Fluoxetine        | 0.29 |
| Dextromethorphan  | Simvastatin       | 0.29 |
| Doxycycline       | Fluvoxamine       | 0.29 |
| Doxycycline       | Raloxifene        | 0.29 |
| Finasteride       | Folic Acid        | 0.29 |
| Finasteride       | Theophylline      | 0.29 |
| Folic Acid        | Quinidine         | 0.29 |
| Imipramine        | Valproic Acid     | 0.29 |
| Miconazole        | Minocycline       | 0.29 |
| Primidone         | Probenecid        | 0.29 |
| Carisoprodol      | Nifedipine        | 0.29 |
| Cimetidine        | Diclofenac        | 0.29 |
| Cisapride         | Meclofenamic Acid | 0.29 |
| Cisapride         | Raloxifene        | 0.29 |
| Diltiazem         | Fluoxetine        | 0.29 |
| Fluoxetine        | Testosterone      | 0.29 |
| Amitriptyline     | Danazol           | 0.29 |
| Chloramphenicol   | Verapamil         | 0.29 |
| Clomipramine      | Raloxifene        | 0.29 |
| Clozapine         | Pimozide          | 0.29 |
| Danazol           | Progesterone      | 0.29 |
| Fluoxetine        | Nifedipine        | 0.29 |
| Meclofenamic Acid | Metformin         | 0.29 |
| Sirolimus         | Verapamil         | 0.29 |
| Clomipramine      | Mesalazine        | 0.29 |
| Amitriptyline     | Ketoconazole      | 0.29 |
| Amoxicillin       | Metformin         | 0.29 |
| Astemizole        | Sirolimus         | 0.29 |
| Buspirone         | Primidone         | 0.29 |
| Carbamazepine     | Minocycline       | 0.29 |
| Celecoxib         | Domperidone       | 0.29 |
| Celecoxib         | Finasteride       | 0.29 |
| Chloroquine       | Domperidone       | 0.29 |
| Cimetidine        | Clozapine         | 0.29 |
| Cisapride         | Minocycline       | 0.29 |
| Cisapride         | Tamoxifen         | 0.29 |
| Clenbuterol       | Propranolol       | 0.29 |
| Clomipramine      | Dextromethorphan  | 0.29 |

|                  |                   |      |
|------------------|-------------------|------|
| Clozapine        | Valproic Acid     | 0.29 |
| Dextromethorphan | Metformin         | 0.29 |
| Dextromethorphan | Paclitaxel        | 0.29 |
| Domperidone      | Fluvoxamine       | 0.29 |
| Doxorubicin      | Risperidone       | 0.29 |
| Estradiol        | Finasteride       | 0.29 |
| Finasteride      | Tolbutamide       | 0.29 |
| Folic Acid       | Lidocaine         | 0.29 |
| Folic Acid       | Theophylline      | 0.29 |
| Irinotecan       | Progesterone      | 0.29 |
| Lidocaine        | Theophylline      | 0.29 |
| Metformin        | Probenecid        | 0.29 |
| Nifedipine       | Pimozide          | 0.29 |
| Ondansetron      | Pentoxifylline    | 0.29 |
| Paclitaxel       | Probenecid        | 0.29 |
| Pentoxifylline   | Risperidone       | 0.29 |
| Pimozide         | Trazodone         | 0.29 |
| Trazodone        | Verapamil         | 0.29 |
| Chloramphenicol  | Paclitaxel        | 0.28 |
| Fluvoxamine      | Terfenadine       | 0.28 |
| Cisapride        | Sirolimus         | 0.28 |
| Clozapine        | Progesterone      | 0.28 |
| Dexamethasone    | Diclofenac        | 0.28 |
| Domperidone      | Tamoxifen         | 0.28 |
| Doxorubicin      | Nifedipine        | 0.28 |
| Fluoxetine       | Simvastatin       | 0.28 |
| Ketoconazole     | Nitrendipine      | 0.28 |
| Amrinone         | Doxorubicin       | 0.28 |
| Amrinone         | Pentoxifylline    | 0.28 |
| Carisoprodol     | Cimetidine        | 0.28 |
| Celecoxib        | Folic Acid        | 0.28 |
| Chloramphenicol  | Erythromycin      | 0.28 |
| Cisapride        | Sulfasalazine     | 0.28 |
| Citalopram       | Raloxifene        | 0.28 |
| Dexamethasone    | Ketoconazole      | 0.28 |
| Domperidone      | Imipramine        | 0.28 |
| Ergocalciferol   | Valproic Acid     | 0.28 |
| Estradiol        | Folic Acid        | 0.28 |
| Finasteride      | Leflunomide       | 0.28 |
| Folic Acid       | Meclofenamic Acid | 0.28 |
| Lidocaine        | Prednisone        | 0.28 |
| Miconazole       | Testosterone      | 0.28 |
| Nifedipine       | Paclitaxel        | 0.28 |

|                  |                |      |
|------------------|----------------|------|
| Astemizole       | Lovastatin     | 0.28 |
| Carisoprodol     | Metformin      | 0.28 |
| Cimetidine       | Pimozide       | 0.28 |
| Cisapride        | Fluoxetine     | 0.28 |
| Clomipramine     | Trazodone      | 0.28 |
| Dextromethorphan | Terfenadine    | 0.28 |
| Diltiazem        | Metformin      | 0.28 |
| Metformin        | Trazodone      | 0.28 |
| Amitriptyline    | Carisoprodol   | 0.27 |
| Buspirone        | Erythromycin   | 0.27 |
| Celecoxib        | Prednisone     | 0.27 |
| Citalopram       | Hydrocortisone | 0.27 |
| Clenbuterol      | Fluoxetine     | 0.27 |
| Clozapine        | Terfenadine    | 0.27 |
| Dapsone          | Folic Acid     | 0.27 |
| Finasteride      | Sirolimus      | 0.27 |
| Folic Acid       | Hydrocortisone | 0.27 |
| Haloperidol      | Pimozide       | 0.27 |
| Haloperidol      | Verapamil      | 0.27 |
| Imatinib         | Pentoxifylline | 0.27 |
| Lovastatin       | Paclitaxel     | 0.27 |
| Nifedipine       | Nitrendipine   | 0.27 |
| Pimozide         | Progesterone   | 0.27 |
| Progesterone     | Proguanil      | 0.27 |
| Sirolimus        | Terfenadine    | 0.27 |
| Theophylline     | Tolbutamide    | 0.27 |
| Astemizole       | Metformin      | 0.27 |
| Amitriptyline    | Lovastatin     | 0.27 |
| Astemizole       | Doxorubicin    | 0.27 |
| Astemizole       | Simvastatin    | 0.27 |
| Celecoxib        | Tamoxifen      | 0.27 |
| Felodipine       | Methotrexate   | 0.27 |
| Haloperidol      | Lovastatin     | 0.27 |
| Lovastatin       | Progesterone   | 0.27 |
| Nitrendipine     | Trazodone      | 0.27 |
| Amoxicillin      | Lidocaine      | 0.27 |
| Citalopram       | Leflunomide    | 0.27 |
| Citalopram       | Minocycline    | 0.27 |
| Dexamethasone    | Verapamil      | 0.27 |
| Domperidone      | Pimozide       | 0.27 |
| Doxorubicin      | Metformin      | 0.27 |
| Doxycycline      | Etidronic Acid | 0.27 |
| Erythromycin     | Testosterone   | 0.27 |

|                  |                |      |
|------------------|----------------|------|
| Finasteride      | Lansoprazole   | 0.27 |
| Metformin        | Valproic Acid  | 0.27 |
| Miconazole       | Paclitaxel     | 0.27 |
| Mimosine         | Pentoxifylline | 0.27 |
| Ondansetron      | Quinidine      | 0.27 |
| Paclitaxel       | Primidone      | 0.27 |
| Proguanil        | Terfenadine    | 0.27 |
| Quinidine        | Sulfasalazine  | 0.27 |
| Amitriptyline    | Paclitaxel     | 0.26 |
| Cisapride        | Clomipramine   | 0.26 |
| Cisapride        | Paclitaxel     | 0.26 |
| Clomipramine     | Progesterone   | 0.26 |
| Amrinone         | Dexamethasone  | 0.26 |
| Carisoprodol     | Domperidone    | 0.26 |
| Celecoxib        | Minocycline    | 0.26 |
| Citalopram       | Sirolimus      | 0.26 |
| Dexamethasone    | Trazodone      | 0.26 |
| Domperidone      | Proguanil      | 0.26 |
| Doxycycline      | Imatinib       | 0.26 |
| Estradiol        | Imipramine     | 0.26 |
| Fluvoxamine      | Imipramine     | 0.26 |
| Fluvoxamine      | Leflunomide    | 0.26 |
| Imipramine       | Raloxifene     | 0.26 |
| Tamoxifen        | Tolbutamide    | 0.26 |
| Amitriptyline    | Miconazole     | 0.26 |
| Amitriptyline    | Valproic Acid  | 0.26 |
| Cisapride        | Simvastatin    | 0.26 |
| Cisapride        | Valproic Acid  | 0.26 |
| Citalopram       | Felodipine     | 0.26 |
| Clozapine        | Estradiol      | 0.26 |
| Dextromethorphan | Irinotecan     | 0.26 |
| Domperidone      | Lovastatin     | 0.26 |
| Fluvoxamine      | Sirolimus      | 0.26 |
| Haloperidol      | Miconazole     | 0.26 |
| Haloperidol      | Simvastatin    | 0.26 |
| Miconazole       | Progesterone   | 0.26 |
| Saquinavir       | Tamoxifen      | 0.26 |
| Amitriptyline    | Cisapride      | 0.26 |
| Astemizole       | Finasteride    | 0.26 |
| Celecoxib        | Nifedipine     | 0.26 |
| Fluoxetine       | Fluvoxamine    | 0.26 |
| Fluoxetine       | Raloxifene     | 0.26 |
| Haloperidol      | Progesterone   | 0.26 |

|                 |                   |      |
|-----------------|-------------------|------|
| Irinotecan      | Sirolimus         | 0.26 |
| Mesalazine      | Proguanil         | 0.26 |
| Mesalazine      | Trazodone         | 0.26 |
| Nitrendipine    | Primidone         | 0.26 |
| Nitrendipine    | Valproic Acid     | 0.26 |
| Sirolimus       | Tamoxifen         | 0.26 |
| Amitriptyline   | Nitrendipine      | 0.26 |
| Celastrol       | Chloramphenicol   | 0.26 |
| Dexamethasone   | Metformin         | 0.26 |
| Domperidone     | Paclitaxel        | 0.26 |
| Fluoxetine      | Irinotecan        | 0.26 |
| Raloxifene      | Verapamil         | 0.26 |
| Simvastatin     | Terfenadine       | 0.26 |
| Haloperidol     | Terfenadine       | 0.26 |
| Progesterone    | Terfenadine       | 0.26 |
| Amitriptyline   | Domperidone       | 0.25 |
| Amitriptyline   | Methotrexate      | 0.25 |
| Amitriptyline   | Quinidine         | 0.25 |
| Amoxicillin     | Hydrocortisone    | 0.25 |
| Amoxicillin     | Probenecid        | 0.25 |
| Amrinone        | Estradiol         | 0.25 |
| Astemizole      | Irinotecan        | 0.25 |
| Astemizole      | Prednisone        | 0.25 |
| Buspirone       | Estradiol         | 0.25 |
| Carbamazepine   | Haloperidol       | 0.25 |
| Carisoprodol    | Celastrol         | 0.25 |
| Carisoprodol    | Meclofenamic Acid | 0.25 |
| Celastrol       | Diltiazem         | 0.25 |
| Celastrol       | Ergocalciferol    | 0.25 |
| Celastrol       | Trazodone         | 0.25 |
| Chloramphenicol | Felodipine        | 0.25 |
| Chloramphenicol | Leflunomide       | 0.25 |
| Chloramphenicol | Pimozide          | 0.25 |
| Chloroquine     | Saquinavir        | 0.25 |
| Cisapride       | Dexamethasone     | 0.25 |
| Cisapride       | Domperidone       | 0.25 |
| Cisapride       | Quinidine         | 0.25 |
| Citalopram      | Etidronic Acid    | 0.25 |
| Citalopram      | Ondansetron       | 0.25 |
| Clenbuterol     | Miconazole        | 0.25 |
| Clenbuterol     | Progesterone      | 0.25 |
| Clozapine       | Nifedipine        | 0.25 |
| Clozapine       | Saquinavir        | 0.25 |

|                   |                   |      |
|-------------------|-------------------|------|
| Dapsone           | Hydrocortisone    | 0.25 |
| Dapsone           | Leflunomide       | 0.25 |
| Dexamethasone     | Nitrendipine      | 0.25 |
| Dextromethorphan  | Probenecid        | 0.25 |
| Diclofenac        | Trazodone         | 0.25 |
| Estradiol         | Lovastatin        | 0.25 |
| Etidronic Acid    | Lidocaine         | 0.25 |
| Etidronic Acid    | Tamoxifen         | 0.25 |
| Etidronic Acid    | Theophylline      | 0.25 |
| Finasteride       | Miconazole        | 0.25 |
| Fluoxetine        | Imipramine        | 0.25 |
| Fluoxetine        | Sirolimus         | 0.25 |
| Fluvoxamine       | Lovastatin        | 0.25 |
| Fluvoxamine       | Proguanil         | 0.25 |
| Folic Acid        | Lovastatin        | 0.25 |
| Folic Acid        | Ondansetron       | 0.25 |
| Imatinib          | Lidocaine         | 0.25 |
| Imatinib          | Meclofenamic Acid | 0.25 |
| Imipramine        | Pimozide          | 0.25 |
| Imipramine        | Saquinavir        | 0.25 |
| Ketoconazole      | Saquinavir        | 0.25 |
| Lansoprazole      | Theophylline      | 0.25 |
| Leflunomide       | Pimozide          | 0.25 |
| Leflunomide       | Sirolimus         | 0.25 |
| Leflunomide       | Tolbutamide       | 0.25 |
| Lidocaine         | Risperidone       | 0.25 |
| Lidocaine         | Testosterone      | 0.25 |
| Lidocaine         | Thalidomide       | 0.25 |
| Lovastatin        | Prednisone        | 0.25 |
| Meclofenamic Acid | Proguanil         | 0.25 |
| Mephénytoin       | Probenecid        | 0.25 |
| Methotrexate      | Progesterone      | 0.25 |
| Methotrexate      | Terfenadine       | 0.25 |
| Minocycline       | Tolbutamide       | 0.25 |
| Nifedipine        | Verapamil         | 0.25 |
| Ondansetron       | Theophylline      | 0.25 |
| Ondansetron       | Triflusal         | 0.25 |
| Pentoxifylline    | Topiramate        | 0.25 |
| Pimozide          | Probenecid        | 0.25 |
| Pimozide          | Propranolol       | 0.25 |
| Pimozide          | Saquinavir        | 0.25 |
| Pimozide          | Sirolimus         | 0.25 |
| Risperidone       | Theophylline      | 0.25 |

|                 |                  |      |
|-----------------|------------------|------|
| Saquinavir      | Verapamil        | 0.25 |
| Fluoxetine      | Metformin        | 0.24 |
| Metformin       | Nifedipine       | 0.24 |
| Celastrol       | Haloperidol      | 0.24 |
| Chloramphenicol | Clomipramine     | 0.24 |
| Metformin       | Sirolimus        | 0.24 |
| Paclitaxel      | Sirolimus        | 0.24 |
| Astemizole      | Chloramphenicol  | 0.24 |
| Astemizole      | Clozapine        | 0.24 |
| Celastrol       | Miconazole       | 0.24 |
| Celastrol       | Simvastatin      | 0.24 |
| Clomipramine    | Leflunomide      | 0.24 |
| Clomipramine    | Minocycline      | 0.24 |
| Clomipramine    | Propranolol      | 0.24 |
| Danazol         | Methotrexate     | 0.24 |
| Diclofenac      | Progesterone     | 0.24 |
| Etidronic Acid  | Verapamil        | 0.24 |
| Ketoconazole    | Metformin        | 0.24 |
| Mesalazine      | Quinidine        | 0.24 |
| Metformin       | Propranolol      | 0.24 |
| Metformin       | Saquinavir       | 0.24 |
| Paclitaxel      | Propranolol      | 0.24 |
| Paclitaxel      | Saquinavir       | 0.24 |
| Pimozide        | Proguanil        | 0.24 |
| Proguanil       | Verapamil        | 0.24 |
| Amitriptyline   | Celecoxib        | 0.24 |
| Amitriptyline   | Fluvoxamine      | 0.24 |
| Amitriptyline   | Raloxifene       | 0.24 |
| Amrinone        | Nifedipine       | 0.24 |
| Astemizole      | Dextromethorphan | 0.24 |
| Astemizole      | Imipramine       | 0.24 |
| Astemizole      | Leflunomide      | 0.24 |
| Chloramphenicol | Lovastatin       | 0.24 |
| Clozapine       | Lovastatin       | 0.24 |
| Diclofenac      | Valproic Acid    | 0.24 |
| Diltiazem       | Felodipine       | 0.24 |
| Doxorubicin     | Irinotecan       | 0.24 |
| Doxorubicin     | Tamoxifen        | 0.24 |
| Ergocalciferol  | Felodipine       | 0.24 |
| Fluoxetine      | Trazodone        | 0.24 |
| Folic Acid      | Nitrendipine     | 0.24 |
| Prednisone      | Progesterone     | 0.24 |
| Carisoprodol    | Chloramphenicol  | 0.24 |

|                  |                    |      |
|------------------|--------------------|------|
| Celecoxib        | Miconazole         | 0.24 |
| Celecoxib        | Pentoxifylline     | 0.24 |
| Celecoxib        | Primidone          | 0.24 |
| Chloramphenicol  | Proguanil          | 0.24 |
| Chloramphenicol  | Testosterone       | 0.24 |
| Cisapride        | Theophylline       | 0.24 |
| Clozapine        | Proguanil          | 0.24 |
| Clozapine        | Trazodone          | 0.24 |
| Dexamethasone    | Methotrexate       | 0.24 |
| Dextromethorphan | Lovastatin         | 0.24 |
| Domperidone      | Finasteride        | 0.24 |
| Doxorubicin      | Raloxifene         | 0.24 |
| Estradiol        | Pentoxifylline     | 0.24 |
| Estradiol        | Simvastatin        | 0.24 |
| Fluvoxamine      | Miconazole         | 0.24 |
| Fluvoxamine      | Valproic Acid      | 0.24 |
| Folic Acid       | Haloperidol        | 0.24 |
| Imatinib         | Saquinavir         | 0.24 |
| Imipramine       | Lovastatin         | 0.24 |
| Lovastatin       | Probenecid         | 0.24 |
| Lovastatin       | Saquinavir         | 0.24 |
| Miconazole       | Prednisone         | 0.24 |
| Raloxifene       | Simvastatin        | 0.24 |
| Amitriptyline    | Verapamil          | 0.24 |
| Carbamazepine    | Finasteride        | 0.24 |
| Carisoprodol     | Imipramine         | 0.24 |
| Carisoprodol     | Ketoconazole       | 0.24 |
| Chloramphenicol  | Diethylcarbamazine | 0.24 |
| Chloramphenicol  | Terfenadine        | 0.24 |
| Cisapride        | Pimozide           | 0.24 |
| Citalopram       | Doxorubicin        | 0.24 |
| Citalopram       | Miconazole         | 0.24 |
| Citalopram       | Pentoxifylline     | 0.24 |
| Clomipramine     | Lovastatin         | 0.24 |
| Dapsone          | Lovastatin         | 0.24 |
| Dextromethorphan | Diltiazem          | 0.24 |
| Domperidone      | Doxycycline        | 0.24 |
| Doxorubicin      | Theophylline       | 0.24 |
| Doxycycline      | Finasteride        | 0.24 |
| Etidronic Acid   | Ketoconazole       | 0.24 |
| Etidronic Acid   | Probenecid         | 0.24 |
| Fluvoxamine      | Mimosine           | 0.24 |
| Folic Acid       | Primidone          | 0.24 |



|                   |                   |      |
|-------------------|-------------------|------|
| Imipramine        | Proguanil         | 0.24 |
| Ketoconazole      | Trazodone         | 0.24 |
| Lidocaine         | Pentoxifylline    | 0.24 |
| Lovastatin        | Tolbutamide       | 0.24 |
| Meclofenamic Acid | Mimosine          | 0.24 |
| Pentoxifylline    | Theophylline      | 0.24 |
| Proguanil         | Propranolol       | 0.24 |
| Propranolol       | Trazodone         | 0.24 |
| Amitriptyline     | Felodipine        | 0.23 |
| Amoxicillin       | Terfenadine       | 0.23 |
| Carisoprodol      | Paclitaxel        | 0.23 |
| Celastrol         | Quinidine         | 0.23 |
| Cimetidine        | Verapamil         | 0.23 |
| Cisapride         | Felodipine        | 0.23 |
| Clomipramine      | Testosterone      | 0.23 |
| Danazol           | Meclofenamic Acid | 0.23 |
| Ergocalciferol    | Metformin         | 0.23 |
| Imipramine        | Terfenadine       | 0.23 |
| Metformin         | Proguanil         | 0.23 |
| Nitrendipine      | Sirolimus         | 0.23 |
| Paclitaxel        | Testosterone      | 0.23 |
| Paclitaxel        | Trazodone         | 0.23 |
| Pimozide          | Valproic Acid     | 0.23 |
| Probenecid        | Terfenadine       | 0.23 |
| Propranolol       | Terfenadine       | 0.23 |
| Saquinavir        | Terfenadine       | 0.23 |
| Valproic Acid     | Verapamil         | 0.23 |
| Amoxicillin       | Thalidomide       | 0.23 |
| Buspirone         | Ketoconazole      | 0.23 |
| Clenbuterol       | Erythromycin      | 0.23 |
| Dexamethasone     | Tamoxifen         | 0.23 |
| Doxorubicin       | Felodipine        | 0.23 |
| Etidronic Acid    | Tolbutamide       | 0.23 |
| Felodipine        | Simvastatin       | 0.23 |
| Fluoxetine        | Valproic Acid     | 0.23 |
| Folic Acid        | Mimosine          | 0.23 |
| Leflunomide       | Ondansetron       | 0.23 |
| Minocycline       | Ondansetron       | 0.23 |
| Nifedipine        | Simvastatin       | 0.23 |
| Saquinavir        | Thalidomide       | 0.23 |
| Danazol           | Nifedipine        | 0.23 |
| Fluoxetine        | Mesalazine        | 0.23 |
| Paclitaxel        | Progesterone      | 0.23 |

|                   |                    |      |
|-------------------|--------------------|------|
| Amitriptyline     | Saquinavir         | 0.23 |
| Carbamazepine     | Tamoxifen          | 0.23 |
| Celecoxib         | Quinidine          | 0.23 |
| Chloramphenicol   | Primidone          | 0.23 |
| Cisapride         | Imipramine         | 0.23 |
| Cisapride         | Probenecid         | 0.23 |
| Dexamethasone     | Estradiol          | 0.23 |
| Diclofenac        | Erythromycin       | 0.23 |
| Domperidone       | Prednisone         | 0.23 |
| Domperidone       | Raloxifene         | 0.23 |
| Etidronic Acid    | Lovastatin         | 0.23 |
| Finasteride       | Meclofenamic Acid  | 0.23 |
| Fluvoxamine       | Methotrexate       | 0.23 |
| Haloperidol       | Minocycline        | 0.23 |
| Imipramine        | Progesterone       | 0.23 |
| Ketoconazole      | Progesterone       | 0.23 |
| Lovastatin        | Proguanil          | 0.23 |
| Meclofenamic Acid | Quinidine          | 0.23 |
| Methotrexate      | Raloxifene         | 0.23 |
| Miconazole        | Sirolimus          | 0.23 |
| Prednisone        | Quinidine          | 0.23 |
| Progesterone      | Propranolol        | 0.23 |
| Simvastatin       | Sirolimus          | 0.23 |
| Diltiazem         | Terfenadine        | 0.23 |
| Lovastatin        | Nitrendipine       | 0.23 |
| Metformin         | Primidone          | 0.23 |
| Paclitaxel        | Simvastatin        | 0.23 |
| Terfenadine       | Trazodone          | 0.23 |
| Nitrendipine      | Terfenadine        | 0.23 |
| Amitriptyline     | Imatinib           | 0.22 |
| Amoxicillin       | Cimetidine         | 0.22 |
| Amoxicillin       | Pentoxifylline     | 0.22 |
| Amrinone          | Testosterone       | 0.22 |
| Buspirone         | Chloroquine        | 0.22 |
| Carbamazepine     | Celecoxib          | 0.22 |
| Carbamazepine     | Fluvoxamine        | 0.22 |
| Carisoprodol      | Diltiazem          | 0.22 |
| Carisoprodol      | Etidronic Acid     | 0.22 |
| Carisoprodol      | Proguanil          | 0.22 |
| Celecoxib         | Doxycycline        | 0.22 |
| Celecoxib         | Topiramate         | 0.22 |
| Chloroquine       | Diethylcarbamazine | 0.22 |
| Chloroquine       | Lansoprazole       | 0.22 |

|                  |                    |      |
|------------------|--------------------|------|
| Cimetidine       | Dextromethorphan   | 0.22 |
| Cimetidine       | Ketoconazole       | 0.22 |
| Cimetidine       | Saquinavir         | 0.22 |
| Cisapride        | Terfenadine        | 0.22 |
| Citalopram       | Finasteride        | 0.22 |
| Clenbuterol      | Prednisone         | 0.22 |
| Clomipramine     | Mimosine           | 0.22 |
| Clozapine        | Mimosine           | 0.22 |
| Dapsone          | Diethylcarbamazine | 0.22 |
| Dapsone          | Lansoprazole       | 0.22 |
| Dapsone          | Thalidomide        | 0.22 |
| Dexamethasone    | Felodipine         | 0.22 |
| Dexamethasone    | Theophylline       | 0.22 |
| Dextromethorphan | Valproic Acid      | 0.22 |
| Diltiazem        | Nitrendipine       | 0.22 |
| Diltiazem        | Testosterone       | 0.22 |
| Diltiazem        | Trazodone          | 0.22 |
| Erythromycin     | Estradiol          | 0.22 |
| Etidronic Acid   | Nitrendipine       | 0.22 |
| Etidronic Acid   | Proguanil          | 0.22 |
| Felodipine       | Quinidine          | 0.22 |
| Finasteride      | Lidocaine          | 0.22 |
| Hydrocortisone   | Ondansetron        | 0.22 |
| Imipramine       | Miconazole         | 0.22 |
| Imipramine       | Simvastatin        | 0.22 |
| Ketoconazole     | Simvastatin        | 0.22 |
| Leflunomide      | Simvastatin        | 0.22 |
| Mephenytoin      | Ondansetron        | 0.22 |
| Methotrexate     | Nifedipine         | 0.22 |
| Miconazole       | Propranolol        | 0.22 |
| Miconazole       | Saquinavir         | 0.22 |
| Minocycline      | Pentoxifylline     | 0.22 |
| Nitrendipine     | Testosterone       | 0.22 |
| Quinidine        | Theophylline       | 0.22 |
| Risperidone      | Tolbutamide        | 0.22 |
| Tamoxifen        | Verapamil          | 0.22 |
| Celecoxib        | Pimozide           | 0.22 |
| Cisapride        | Nitrendipine       | 0.22 |
| Clomipramine     | Finasteride        | 0.22 |
| Danazol          | Imatinib           | 0.22 |
| Estradiol        | Verapamil          | 0.22 |
| Felodipine       | Tamoxifen          | 0.22 |
| Fluvoxamine      | Pimozide           | 0.22 |

|                   |                  |      |
|-------------------|------------------|------|
| Meclofenamic Acid | Verapamil        | 0.22 |
| Metformin         | Methotrexate     | 0.22 |
| Metformin         | Quinidine        | 0.22 |
| Amitriptyline     | Proguanil        | 0.22 |
| Amrinone          | Progesterone     | 0.22 |
| Carisoprodol      | Haloperidol      | 0.22 |
| Celecoxib         | Raloxifene       | 0.22 |
| Chloramphenicol   | Domperidone      | 0.22 |
| Cisapride         | Etidronic Acid   | 0.22 |
| Clozapine         | Domperidone      | 0.22 |
| Diltiazem         | Progesterone     | 0.22 |
| Ergocalciferol    | Progesterone     | 0.22 |
| Etidronic Acid    | Haloperidol      | 0.22 |
| Haloperidol       | Proguanil        | 0.22 |
| Imatinib          | Miconazole       | 0.22 |
| Lovastatin        | Miconazole       | 0.22 |
| Lovastatin        | Pentoxifylline   | 0.22 |
| Lovastatin        | Primidone        | 0.22 |
| Progesterone      | Testosterone     | 0.22 |
| Tamoxifen         | Theophylline     | 0.22 |
| Fluoxetine        | Verapamil        | 0.22 |
| Paclitaxel        | Tamoxifen        | 0.22 |
| Amitriptyline     | Progesterone     | 0.21 |
| Amrinone          | Thalidomide      | 0.21 |
| Astemizole        | Dexamethasone    | 0.21 |
| Buspirone         | Etidronic Acid   | 0.21 |
| Carbamazepine     | Citalopram       | 0.21 |
| Carisoprodol      | Mesalazine       | 0.21 |
| Celastrol         | Dextromethorphan | 0.21 |
| Celastrol         | Imipramine       | 0.21 |
| Celecoxib         | Felodipine       | 0.21 |
| Chloroquine       | Cimetidine       | 0.21 |
| Chloroquine       | Pentoxifylline   | 0.21 |
| Cisapride         | Progesterone     | 0.21 |
| Citalopram        | Doxycycline      | 0.21 |
| Citalopram        | Erythromycin     | 0.21 |
| Clozapine         | Diclofenac       | 0.21 |
| Dapsone           | Primidone        | 0.21 |
| Doxorubicin       | Nitrendipine     | 0.21 |
| Doxorubicin       | Tolbutamide      | 0.21 |
| Erythromycin      | Lidocaine        | 0.21 |
| Estradiol         | Nifedipine       | 0.21 |
| Etidronic Acid    | Ondansetron      | 0.21 |

|                  |                |      |
|------------------|----------------|------|
| Etidronic Acid   | Risperidone    | 0.21 |
| Etidronic Acid   | Thalidomide    | 0.21 |
| Fluoxetine       | Prednisone     | 0.21 |
| Folic Acid       | Topiramate     | 0.21 |
| Leflunomide      | Mimosine       | 0.21 |
| Lidocaine        | Topiramate     | 0.21 |
| Mimosine         | Minocycline    | 0.21 |
| Mimosine         | Saquinavir     | 0.21 |
| Nifedipine       | Raloxifene     | 0.21 |
| Paclitaxel       | Topiramate     | 0.21 |
| Theophylline     | Topiramate     | 0.21 |
| Celecoxib        | Paclitaxel     | 0.21 |
| Cisapride        | Mesalazine     | 0.21 |
| Clomipramine     | Prednisone     | 0.21 |
| Domperidone      | Terfenadine    | 0.21 |
| Felodipine       | Fluoxetine     | 0.21 |
| Finasteride      | Terfenadine    | 0.21 |
| Amitriptyline    | Buspirone      | 0.21 |
| Amrinone         | Miconazole     | 0.21 |
| Carisoprodol     | Pentoxifylline | 0.21 |
| Celecoxib        | Citalopram     | 0.21 |
| Celecoxib        | Theophylline   | 0.21 |
| Cimetidine       | Diltiazem      | 0.21 |
| Cimetidine       | Ergocalciferol | 0.21 |
| Citalopram       | Estradiol      | 0.21 |
| Citalopram       | Fluvoxamine    | 0.21 |
| Dextromethorphan | Methotrexate   | 0.21 |
| Diclofenac       | Terfenadine    | 0.21 |
| Diltiazem        | Primidone      | 0.21 |
| Diltiazem        | Valproic Acid  | 0.21 |
| Domperidone      | Ketoconazole   | 0.21 |
| Domperidone      | Probenecid     | 0.21 |
| Domperidone      | Saquinavir     | 0.21 |
| Doxorubicin      | Etidronic Acid | 0.21 |
| Ergocalciferol   | Simvastatin    | 0.21 |
| Estradiol        | Lidocaine      | 0.21 |
| Etidronic Acid   | Primidone      | 0.21 |
| Fluvoxamine      | Folic Acid     | 0.21 |
| Folic Acid       | Prednisone     | 0.21 |
| Ketoconazole     | Quinidine      | 0.21 |
| Methotrexate     | Propranolol    | 0.21 |
| Miconazole       | Trazodone      | 0.21 |
| Minocycline      | Quinidine      | 0.21 |

|                   |                   |      |
|-------------------|-------------------|------|
| Raloxifene        | Theophylline      | 0.21 |
| Simvastatin       | Trazodone         | 0.21 |
| Trazodone         | Valproic Acid     | 0.21 |
| Astemizole        | Carbamazepine     | 0.21 |
| Celecoxib         | Sirolimus         | 0.21 |
| Cimetidine        | Progesterone      | 0.21 |
| Cisapride         | Miconazole        | 0.21 |
| Citalopram        | Nifedipine        | 0.21 |
| Clozapine         | Prednisone        | 0.21 |
| Dexamethasone     | Lovastatin        | 0.21 |
| Dextromethorphan  | Tamoxifen         | 0.21 |
| Diclofenac        | Ketoconazole      | 0.21 |
| Doxorubicin       | Progesterone      | 0.21 |
| Haloperidol       | Valproic Acid     | 0.21 |
| Irinotecan        | Probenecid        | 0.21 |
| Lovastatin        | Methotrexate      | 0.21 |
| Minocycline       | Tamoxifen         | 0.21 |
| Primidone         | Progesterone      | 0.21 |
| Celastrol         | Testosterone      | 0.21 |
| Danazol           | Miconazole        | 0.21 |
| Danazol           | Valproic Acid     | 0.21 |
| Dextromethorphan  | Verapamil         | 0.21 |
| Imipramine        | Verapamil         | 0.21 |
| Irinotecan        | Lovastatin        | 0.21 |
| Ketoconazole      | Pimozide          | 0.21 |
| Ketoconazole      | Verapamil         | 0.21 |
| Methotrexate      | Nitrendipine      | 0.21 |
| Nifedipine        | Sirolimus         | 0.21 |
| Celastrol         | Cisapride         | 0.21 |
| Clozapine         | Metformin         | 0.21 |
| Clozapine         | Paclitaxel        | 0.21 |
| Meclofenamic Acid | Terfenadine       | 0.21 |
| Amitriptyline     | Diclofenac        | 0.20 |
| Amitriptyline     | Finasteride       | 0.20 |
| Amoxicillin       | Fluvoxamine       | 0.20 |
| Amoxicillin       | Meclofenamic Acid | 0.20 |
| Amrinone          | Verapamil         | 0.20 |
| Astemizole        | Citalopram        | 0.20 |
| Buspirone         | Cimetidine        | 0.20 |
| Buspirone         | Sulfasalazine     | 0.20 |
| Buspirone         | Valproic Acid     | 0.20 |
| Carbamazepine     | Imatinib          | 0.20 |
| Carisoprodol      | Pimozide          | 0.20 |

|                    |                |      |
|--------------------|----------------|------|
| Carisoprodol       | Quinidine      | 0.20 |
| Carisoprodol       | Verapamil      | 0.20 |
| Celastrol          | Cimetidine     | 0.20 |
| Celastrol          | Primidone      | 0.20 |
| Celastrol          | Valproic Acid  | 0.20 |
| Celecoxib          | Imipramine     | 0.20 |
| Celecoxib          | Leflunomide    | 0.20 |
| Celecoxib          | Triflusal      | 0.20 |
| Chloramphenicol    | Sirolimus      | 0.20 |
| Cimetidine         | Primidone      | 0.20 |
| Cimetidine         | Simvastatin    | 0.20 |
| Cimetidine         | Thalidomide    | 0.20 |
| Cimetidine         | Valproic Acid  | 0.20 |
| Citalopram         | Folic Acid     | 0.20 |
| Citalopram         | Terfenadine    | 0.20 |
| Citalopram         | Theophylline   | 0.20 |
| Clenbuterol        | Imipramine     | 0.20 |
| Clenbuterol        | Saquinavir     | 0.20 |
| Clomipramine       | Imatinib       | 0.20 |
| Clomipramine       | Imipramine     | 0.20 |
| Clomipramine       | Saquinavir     | 0.20 |
| Danazol            | Mimosine       | 0.20 |
| Dapsone            | Domperidone    | 0.20 |
| Dexamethasone      | Ergocalciferol | 0.20 |
| Dexamethasone      | Etidronic Acid | 0.20 |
| Dexamethasone      | Mesalazine     | 0.20 |
| Dexamethasone      | Testosterone   | 0.20 |
| Dexamethasone      | Tolbutamide    | 0.20 |
| Dextromethorphan   | Felodipine     | 0.20 |
| Dextromethorphan   | Fluvoxamine    | 0.20 |
| Dextromethorphan   | Nifedipine     | 0.20 |
| Dextromethorphan   | Raloxifene     | 0.20 |
| Diclofenac         | Diltiazem      | 0.20 |
| Diclofenac         | Testosterone   | 0.20 |
| Diethylcarbamazine | Lansoprazole   | 0.20 |
| Diethylcarbamazine | Thalidomide    | 0.20 |
| Diltiazem          | Irinotecan     | 0.20 |
| Diltiazem          | Pimozide       | 0.20 |
| Domperidone        | Etidronic Acid | 0.20 |
| Domperidone        | Hydrocortisone | 0.20 |
| Doxycycline        | Minocycline    | 0.20 |
| Ergocalciferol     | Irinotecan     | 0.20 |
| Erythromycin       | Nitrendipine   | 0.20 |

|                   |                   |      |
|-------------------|-------------------|------|
| Erythromycin      | Propranolol       | 0.20 |
| Estradiol         | Minocycline       | 0.20 |
| Estradiol         | Saquinavir        | 0.20 |
| Felodipine        | Ketoconazole      | 0.20 |
| Felodipine        | Leflunomide       | 0.20 |
| Felodipine        | Minocycline       | 0.20 |
| Finasteride       | Testosterone      | 0.20 |
| Fluoxetine        | Saquinavir        | 0.20 |
| Fluvoxamine       | Minocycline       | 0.20 |
| Fluvoxamine       | Probenecid        | 0.20 |
| Fluvoxamine       | Propranolol       | 0.20 |
| Folic Acid        | Sirolimus         | 0.20 |
| Haloperidol       | Methotrexate      | 0.20 |
| Haloperidol       | Quinidine         | 0.20 |
| Hydrocortisone    | Mimosine          | 0.20 |
| Imatinib          | Paclitaxel        | 0.20 |
| Imatinib          | Topiramate        | 0.20 |
| Imipramine        | Prednisone        | 0.20 |
| Irinotecan        | Testosterone      | 0.20 |
| Ketoconazole      | Prednisone        | 0.20 |
| Lansoprazole      | Ondansetron       | 0.20 |
| Lansoprazole      | Primidone         | 0.20 |
| Lansoprazole      | Risperidone       | 0.20 |
| Lansoprazole      | Sulfasalazine     | 0.20 |
| Lansoprazole      | Thalidomide       | 0.20 |
| Leflunomide       | Meclofenamic Acid | 0.20 |
| Leflunomide       | Raloxifene        | 0.20 |
| Lovastatin        | Metformin         | 0.20 |
| Meclofenamic Acid | Nitrendipine      | 0.20 |
| Mephentyoin       | Mimosine          | 0.20 |
| Methotrexate      | Testosterone      | 0.20 |
| Mimosine          | Tolbutamide       | 0.20 |
| Minocycline       | Raloxifene        | 0.20 |
| Ondansetron       | Risperidone       | 0.20 |
| Ondansetron       | Sulfasalazine     | 0.20 |
| Ondansetron       | Thalidomide       | 0.20 |
| Pentoxifylline    | Sulfasalazine     | 0.20 |
| Pentoxifylline    | Thalidomide       | 0.20 |
| Progesterone      | Quinidine         | 0.20 |
| Propranolol       | Raloxifene        | 0.20 |
| Quinidine         | Trazodone         | 0.20 |
| Risperidone       | Simvastatin       | 0.20 |
| Risperidone       | Sulfasalazine     | 0.20 |



|                |               |      |
|----------------|---------------|------|
| Risperidone    | Thalidomide   | 0.20 |
| Sulfasalazine  | Valproic Acid | 0.20 |
| Tamoxifen      | Trazodone     | 0.20 |
| Amitriptyline  | Metformin     | 0.19 |
| Celastrol      | Tamoxifen     | 0.19 |
| Haloperidol    | Paclitaxel    | 0.19 |
| Mesalazine     | Nifedipine    | 0.19 |
| Astemizole     | Imatinib      | 0.19 |
| Celastrol      | Methotrexate  | 0.19 |
| Cisapride      | Nifedipine    | 0.19 |
| Danazol        | Fluvoxamine   | 0.19 |
| Ergocalciferol | Paclitaxel    | 0.19 |
| Etidronic Acid | Metformin     | 0.19 |
| Leflunomide    | Terfenadine   | 0.19 |
| Miconazole     | Verapamil     | 0.19 |
| Nifedipine     | Progesterone  | 0.19 |
| Paclitaxel     | Proguanil     | 0.19 |
| Amitriptyline  | Estradiol     | 0.19 |
| Amoxicillin    | Astemizole    | 0.19 |
| Amrinone       | Fluoxetine    | 0.19 |
| Astemizole     | Ketoconazole  | 0.19 |
| Astemizole     | Minocycline   | 0.19 |
| Astemizole     | Propranolol   | 0.19 |
| Astemizole     | Saquinavir    | 0.19 |
| Carisoprodol   | Felodipine    | 0.19 |
| Celecoxib      | Progesterone  | 0.19 |
| Cimetidine     | Tamoxifen     | 0.19 |
| Clenbuterol    | Danazol       | 0.19 |
| Clozapine      | Imatinib      | 0.19 |
| Diclofenac     | Doxorubicin   | 0.19 |
| Diclofenac     | Primidone     | 0.19 |
| Diclofenac     | Simvastatin   | 0.19 |
| Ergocalciferol | Nifedipine    | 0.19 |
| Estradiol      | Progesterone  | 0.19 |
| Etidronic Acid | Nifedipine    | 0.19 |
| Felodipine     | Testosterone  | 0.19 |
| Felodipine     | Trazodone     | 0.19 |
| Fluoxetine     | Proguanil     | 0.19 |
| Fluvoxamine    | Progesterone  | 0.19 |
| Irinotecan     | Miconazole    | 0.19 |
| Irinotecan     | Simvastatin   | 0.19 |
| Irinotecan     | Valproic Acid | 0.19 |
| Lidocaine      | Nitrendipine  | 0.19 |

|                  |                   |      |
|------------------|-------------------|------|
| Tamoxifen        | Valproic Acid     | 0.19 |
| Amitriptyline    | Clenbuterol       | 0.19 |
| Amoxicillin      | Chloramphenicol   | 0.19 |
| Amoxicillin      | Clozapine         | 0.19 |
| Amrinone         | Raloxifene        | 0.19 |
| Buspirone        | Diclofenac        | 0.19 |
| Carbamazepine    | Cisapride         | 0.19 |
| Carisoprodol     | Celecoxib         | 0.19 |
| Carisoprodol     | Estradiol         | 0.19 |
| Celecoxib        | Ergocalciferol    | 0.19 |
| Celecoxib        | Etidronic Acid    | 0.19 |
| Chloramphenicol  | Probenecid        | 0.19 |
| Cimetidine       | Domperidone       | 0.19 |
| Cisapride        | Clenbuterol       | 0.19 |
| Cisapride        | Doxycycline       | 0.19 |
| Cisapride        | Topiramate        | 0.19 |
| Citalopram       | Lovastatin        | 0.19 |
| Clozapine        | Dextromethorphan  | 0.19 |
| Clozapine        | Ketoconazole      | 0.19 |
| Clozapine        | Leflunomide       | 0.19 |
| Clozapine        | Propranolol       | 0.19 |
| Dexamethasone    | Miconazole        | 0.19 |
| Dexamethasone    | Pentoxifylline    | 0.19 |
| Dextromethorphan | Sirolimus         | 0.19 |
| Diltiazem        | Fluvoxamine       | 0.19 |
| Domperidone      | Simvastatin       | 0.19 |
| Ergocalciferol   | Estradiol         | 0.19 |
| Ergocalciferol   | Meclofenamic Acid | 0.19 |
| Etidronic Acid   | Prednisone        | 0.19 |
| Finasteride      | Simvastatin       | 0.19 |
| Ketoconazole     | Sirolimus         | 0.19 |
| Lovastatin       | Theophylline      | 0.19 |
| Methotrexate     | Miconazole        | 0.19 |
| Ondansetron      | Tamoxifen         | 0.19 |
| Tamoxifen        | Thalidomide       | 0.19 |
| Astemizole       | Mesalazine        | 0.19 |
| Amrinone         | Carbamazepine     | 0.19 |
| Amrinone         | Doxycycline       | 0.19 |
| Amrinone         | Erythromycin      | 0.19 |
| Amrinone         | Terfenadine       | 0.19 |
| Astemizole       | Cisapride         | 0.19 |
| Astemizole       | Progesterone      | 0.19 |
| Buspirone        | Domperidone       | 0.19 |

|                   |                   |      |
|-------------------|-------------------|------|
| Carbamazepine     | Etidronic Acid    | 0.19 |
| Carisoprodol      | Erythromycin      | 0.19 |
| Celastrol         | Celecoxib         | 0.19 |
| Celecoxib         | Mephenytoin       | 0.19 |
| Chloroquine       | Estradiol         | 0.19 |
| Cimetidine        | Paclitaxel        | 0.19 |
| Clenbuterol       | Diltiazem         | 0.19 |
| Clenbuterol       | Trazodone         | 0.19 |
| Clomipramine      | Simvastatin       | 0.19 |
| Clozapine         | Danazol           | 0.19 |
| Clozapine         | Mesalazine        | 0.19 |
| Danazol           | Sirolimus         | 0.19 |
| Dapsone           | Meclofenamic Acid | 0.19 |
| Dexamethasone     | Ondansetron       | 0.19 |
| Dexamethasone     | Pimozide          | 0.19 |
| Domperidone       | Verapamil         | 0.19 |
| Ergocalciferol    | Topiramate        | 0.19 |
| Erythromycin      | Etidronic Acid    | 0.19 |
| Finasteride       | Ondansetron       | 0.19 |
| Fluvoxamine       | Hydrocortisone    | 0.19 |
| Fluvoxamine       | Mephenytoin       | 0.19 |
| Folic Acid        | Leflunomide       | 0.19 |
| Lansoprazole      | Quinidine         | 0.19 |
| Lidocaine         | Propranolol       | 0.19 |
| Meclofenamic Acid | Mephenytoin       | 0.19 |
| Mesalazine        | Sirolimus         | 0.19 |
| Methotrexate      | Pimozide          | 0.19 |
| Minocycline       | Theophylline      | 0.19 |
| Paclitaxel        | Pentoxifylline    | 0.19 |
| Paclitaxel        | Valproic Acid     | 0.19 |
| Quinidine         | Verapamil         | 0.19 |
| Testosterone      | Topiramate        | 0.19 |
| Amitriptyline     | Sirolimus         | 0.19 |
| Amoxicillin       | Nitrendipine      | 0.19 |
| Astemizole        | Proguanil         | 0.19 |
| Astemizole        | Trazodone         | 0.19 |
| Chloramphenicol   | Progesterone      | 0.19 |
| Cimetidine        | Nifedipine        | 0.19 |
| Cisapride         | Clozapine         | 0.19 |
| Dextromethorphan  | Nitrendipine      | 0.19 |
| Diclofenac        | Methotrexate      | 0.19 |
| Diclofenac        | Quinidine         | 0.19 |
| Doxorubicin       | Fluoxetine        | 0.19 |

|                |                |      |
|----------------|----------------|------|
| Felodipine     | Pentoxifylline | 0.19 |
| Haloperidol    | Sirolimus      | 0.19 |
| Irinotecan     | Quinidine      | 0.19 |
| Methotrexate   | Tamoxifen      | 0.19 |
| Miconazole     | Nifedipine     | 0.19 |
| Nifedipine     | Valproic Acid  | 0.19 |
| Quinidine      | Tamoxifen      | 0.19 |
| Amoxicillin    | Imatinib       | 0.18 |
| Carbamazepine  | Tolbutamide    | 0.18 |
| Celastrol      | Sirolimus      | 0.18 |
| Celecoxib      | Cimetidine     | 0.18 |
| Celecoxib      | Valproic Acid  | 0.18 |
| Celecoxib      | Verapamil      | 0.18 |
| Chloroquine    | Doxycycline    | 0.18 |
| Cimetidine     | Terfenadine    | 0.18 |
| Citalopram     | Haloperidol    | 0.18 |
| Clomipramine   | Domperidone    | 0.18 |
| Clomipramine   | Quinidine      | 0.18 |
| Clozapine      | Diltiazem      | 0.18 |
| Clozapine      | Etidronic Acid | 0.18 |
| Danazol        | Lovastatin     | 0.18 |
| Dapsone        | Erythromycin   | 0.18 |
| Dapsone        | Topiramate     | 0.18 |
| Dexamethasone  | Paclitaxel     | 0.18 |
| Doxorubicin    | Estradiol      | 0.18 |
| Doxorubicin    | Terfenadine    | 0.18 |
| Doxycycline    | Hydrocortisone | 0.18 |
| Doxycycline    | Tolbutamide    | 0.18 |
| Erythromycin   | Hydrocortisone | 0.18 |
| Erythromycin   | Tolbutamide    | 0.18 |
| Estradiol      | Miconazole     | 0.18 |
| Estradiol      | Primidone      | 0.18 |
| Estradiol      | Valproic Acid  | 0.18 |
| Etidronic Acid | Sirolimus      | 0.18 |
| Fluvoxamine    | Pentoxifylline | 0.18 |
| Folic Acid     | Triflusal      | 0.18 |
| Haloperidol    | Lidocaine      | 0.18 |
| Haloperidol    | Nitrendipine   | 0.18 |
| Imatinib       | Imipramine     | 0.18 |
| Imatinib       | Minocycline    | 0.18 |
| Imatinib       | Propranolol    | 0.18 |
| Ketoconazole   | Lovastatin     | 0.18 |
| Lovastatin     | Propranolol    | 0.18 |

|                   |                   |      |
|-------------------|-------------------|------|
| Meclofenamic Acid | Valproic Acid     | 0.18 |
| Mephenytoin       | Topiramate        | 0.18 |
| Paclitaxel        | Quinidine         | 0.18 |
| Pentoxifylline    | Prednisone        | 0.18 |
| Pentoxifylline    | Raloxifene        | 0.18 |
| Pimozide          | Raloxifene        | 0.18 |
| Terfenadine       | Valproic Acid     | 0.18 |
| Amoxicillin       | Mesalazine        | 0.18 |
| Danazol           | Imipramine        | 0.18 |
| Danazol           | Ketoconazole      | 0.18 |
| Danazol           | Saquinavir        | 0.18 |
| Dexamethasone     | Fluoxetine        | 0.18 |
| Dextromethorphan  | Mesalazine        | 0.18 |
| Domperidone       | Fluoxetine        | 0.18 |
| Domperidone       | Nifedipine        | 0.18 |
| Erythromycin      | Verapamil         | 0.18 |
| Finasteride       | Fluoxetine        | 0.18 |
| Fluoxetine        | Quinidine         | 0.18 |
| Leflunomide       | Mesalazine        | 0.18 |
| Nifedipine        | Quinidine         | 0.18 |
| Amoxicillin       | Dextromethorphan  | 0.18 |
| Amoxicillin       | Ketoconazole      | 0.18 |
| Amrinone          | Citalopram        | 0.18 |
| Amrinone          | Lidocaine         | 0.18 |
| Amrinone          | Theophylline      | 0.18 |
| Astemizole        | Diclofenac        | 0.18 |
| Buspirone         | Celecoxib         | 0.18 |
| Carbamazepine     | Doxorubicin       | 0.18 |
| Carisoprodol      | Folic Acid        | 0.18 |
| Celastrol         | Imatinib          | 0.18 |
| Celastrol         | Lovastatin        | 0.18 |
| Celecoxib         | Clomipramine      | 0.18 |
| Chloramphenicol   | Chloroquine       | 0.18 |
| Chloramphenicol   | Hydrocortisone    | 0.18 |
| Chloramphenicol   | Mephenytoin       | 0.18 |
| Cimetidine        | Erythromycin      | 0.18 |
| Cisapride         | Danazol           | 0.18 |
| Clenbuterol       | Simvastatin       | 0.18 |
| Clomipramine      | Meclofenamic Acid | 0.18 |
| Dextromethorphan  | Leflunomide       | 0.18 |
| Dextromethorphan  | Saquinavir        | 0.18 |
| Doxorubicin       | Doxycycline       | 0.18 |
| Doxycycline       | Pentoxifylline    | 0.18 |

|                  |                   |      |
|------------------|-------------------|------|
| Erythromycin     | Miconazole        | 0.18 |
| Estradiol        | Risperidone       | 0.18 |
| Etidronic Acid   | Folic Acid        | 0.18 |
| Finasteride      | Mimosine          | 0.18 |
| Fluvoxamine      | Paclitaxel        | 0.18 |
| Lansoprazole     | Meclofenamic Acid | 0.18 |
| Lansoprazole     | Prednisone        | 0.18 |
| Leflunomide      | Minocycline       | 0.18 |
| Mephenytoin      | Sirolimus         | 0.18 |
| Mimosine         | Quinidine         | 0.18 |
| Ondansetron      | Prednisone        | 0.18 |
| Quinidine        | Terfenadine       | 0.18 |
| Sirolimus        | Tolbutamide       | 0.18 |
| Testosterone     | Theophylline      | 0.18 |
| Amitriptyline    | Minocycline       | 0.17 |
| Chloramphenicol  | Simvastatin       | 0.17 |
| Cisapride        | Ketoconazole      | 0.17 |
| Cisapride        | Leflunomide       | 0.17 |
| Clozapine        | Miconazole        | 0.17 |
| Clozapine        | Simvastatin       | 0.17 |
| Dexamethasone    | Prednisone        | 0.17 |
| Dextromethorphan | Haloperidol       | 0.17 |
| Domperidone      | Meclofenamic Acid | 0.17 |
| Doxycycline      | Tamoxifen         | 0.17 |
| Erythromycin     | Tamoxifen         | 0.17 |
| Fluvoxamine      | Quinidine         | 0.17 |
| Haloperidol      | Propranolol       | 0.17 |
| Imatinib         | Proguanil         | 0.17 |
| Imatinib         | Testosterone      | 0.17 |
| Irinotecan       | Topiramate        | 0.17 |
| Lovastatin       | Testosterone      | 0.17 |
| Pentoxifylline   | Sirolimus         | 0.17 |
| Probenecid       | Progesterone      | 0.17 |
| Sirolimus        | Valproic Acid     | 0.17 |
| Amrinone         | Mesalazine        | 0.17 |
| Carbamazepine    | Clomipramine      | 0.17 |
| Celastrol        | Ketoconazole      | 0.17 |
| Celastrol        | Probenecid        | 0.17 |
| Celecoxib        | Fluoxetine        | 0.17 |
| Chloramphenicol  | Irinotecan        | 0.17 |
| Clenbuterol      | Clomipramine      | 0.17 |
| Danazol          | Ergocalciferol    | 0.17 |
| Danazol          | Trazodone         | 0.17 |

|                 |                   |      |
|-----------------|-------------------|------|
| Diclofenac      | Sirolimus         | 0.17 |
| Erythromycin    | Metformin         | 0.17 |
| Felodipine      | Fluvoxamine       | 0.17 |
| Felodipine      | Meclofenamic Acid | 0.17 |
| Felodipine      | Raloxifene        | 0.17 |
| Mesalazine      | Testosterone      | 0.17 |
| Mimosine        | Terfenadine       | 0.17 |
| Nitrendipine    | Pentoxifylline    | 0.17 |
| Nitrendipine    | Simvastatin       | 0.17 |
| Imatinib        | Pimozide          | 0.17 |
| Lovastatin      | Verapamil         | 0.17 |
| Amitriptyline   | Diltiazem         | 0.17 |
| Amitriptyline   | Etidronic Acid    | 0.17 |
| Amitriptyline   | Testosterone      | 0.17 |
| Amoxicillin     | Carisoprodol      | 0.17 |
| Amoxicillin     | Diltiazem         | 0.17 |
| Amoxicillin     | Pimozide          | 0.17 |
| Amrinone        | Cisapride         | 0.17 |
| Amrinone        | Minocycline       | 0.17 |
| Amrinone        | Propranolol       | 0.17 |
| Amrinone        | Saquinavir        | 0.17 |
| Astemizole      | Celecoxib         | 0.17 |
| Astemizole      | Estradiol         | 0.17 |
| Buspirone       | Chloramphenicol   | 0.17 |
| Buspirone       | Clozapine         | 0.17 |
| Buspirone       | Nitrendipine      | 0.17 |
| Buspirone       | Topiramate        | 0.17 |
| Carbamazepine   | Dexamethasone     | 0.17 |
| Carbamazepine   | Domperidone       | 0.17 |
| Carbamazepine   | Fluoxetine        | 0.17 |
| Carbamazepine   | Nifedipine        | 0.17 |
| Carisoprodol    | Cisapride         | 0.17 |
| Carisoprodol    | Probenecid        | 0.17 |
| Celastrol       | Proguanil         | 0.17 |
| Chloramphenicol | Methotrexate      | 0.17 |
| Chloramphenicol | Ondansetron       | 0.17 |
| Chloroquine     | Citalopram        | 0.17 |
| Chloroquine     | Folic Acid        | 0.17 |
| Chloroquine     | Lovastatin        | 0.17 |
| Cimetidine      | Citalopram        | 0.17 |
| Cimetidine      | Danazol           | 0.17 |
| Cimetidine      | Lovastatin        | 0.17 |
| Cisapride       | Diltiazem         | 0.17 |

|                    |                   |      |
|--------------------|-------------------|------|
| Cisapride          | Proguanil         | 0.17 |
| Cisapride          | Testosterone      | 0.17 |
| Cisapride          | Verapamil         | 0.17 |
| Citalopram         | Clomipramine      | 0.17 |
| Citalopram         | Dapsone           | 0.17 |
| Citalopram         | Mephenytoin       | 0.17 |
| Citalopram         | Simvastatin       | 0.17 |
| Clenbuterol        | Dexamethasone     | 0.17 |
| Clenbuterol        | Lansoprazole      | 0.17 |
| Clenbuterol        | Quinidine         | 0.17 |
| Clenbuterol        | Sulfasalazine     | 0.17 |
| Clomipramine       | Folic Acid        | 0.17 |
| Clozapine          | Finasteride       | 0.17 |
| Clozapine          | Fluoxetine        | 0.17 |
| Clozapine          | Quinidine         | 0.17 |
| Danazol            | Doxorubicin       | 0.17 |
| Danazol            | Pentoxifylline    | 0.17 |
| Dexamethasone      | Erythromycin      | 0.17 |
| Dexamethasone      | Sirolimus         | 0.17 |
| Diclofenac         | Lovastatin        | 0.17 |
| Diethylcarbamazine | Erythromycin      | 0.17 |
| Diltiazem          | Propranolol       | 0.17 |
| Domperidone        | Erythromycin      | 0.17 |
| Domperidone        | Topiramate        | 0.17 |
| Doxorubicin        | Lovastatin        | 0.17 |
| Doxycycline        | Methotrexate      | 0.17 |
| Doxycycline        | Thalidomide       | 0.17 |
| Ergocalciferol     | Ketoconazole      | 0.17 |
| Ergocalciferol     | Probenecid        | 0.17 |
| Erythromycin       | Nifedipine        | 0.17 |
| Erythromycin       | Risperidone       | 0.17 |
| Erythromycin       | Thalidomide       | 0.17 |
| Estradiol          | Meclofenamic Acid | 0.17 |
| Etidronic Acid     | Imipramine        | 0.17 |
| Etidronic Acid     | Minocycline       | 0.17 |
| Etidronic Acid     | Progesterone      | 0.17 |
| Etidronic Acid     | Saquinavir        | 0.17 |
| Fluoxetine         | Nitrendipine      | 0.17 |
| Folic Acid         | Tolbutamide       | 0.17 |
| Haloperidol        | Trazodone         | 0.17 |
| Imatinib           | Primidone         | 0.17 |
| Imatinib           | Simvastatin       | 0.17 |
| Imatinib           | Valproic Acid     | 0.17 |



|                |                |      |
|----------------|----------------|------|
| Imipramine     | Testosterone   | 0.17 |
| Lansoprazole   | Topiramate     | 0.17 |
| Lidocaine      | Tamoxifen      | 0.17 |
| Lidocaine      | Tolbutamide    | 0.17 |
| Lovastatin     | Mephenytoin    | 0.17 |
| Lovastatin     | Valproic Acid  | 0.17 |
| Mephenytoin    | Mesalazine     | 0.17 |
| Mesalazine     | Pentoxifylline | 0.17 |
| Minocycline    | Pimozide       | 0.17 |
| Minocycline    | Testosterone   | 0.17 |
| Minocycline    | Triflusal      | 0.17 |
| Minocycline    | Verapamil      | 0.17 |
| Nitrendipine   | Sulfasalazine  | 0.17 |
| Ondansetron    | Sirolimus      | 0.17 |
| Primidone      | Theophylline   | 0.17 |
| Probenecid     | Verapamil      | 0.17 |
| Proguanil      | Saquinavir     | 0.17 |
| Propranolol    | Testosterone   | 0.17 |
| Quinidine      | Topiramate     | 0.17 |
| Risperidone    | Topiramate     | 0.17 |
| Saquinavir     | Trazodone      | 0.17 |
| Simvastatin    | Theophylline   | 0.17 |
| Sulfasalazine  | Topiramate     | 0.17 |
| Astemizole     | Nitrendipine   | 0.16 |
| Amitriptyline  | Irinotecan     | 0.16 |
| Amoxicillin    | Paclitaxel     | 0.16 |
| Cisapride      | Diclofenac     | 0.16 |
| Clomipramine   | Ketoconazole   | 0.16 |
| Danazol        | Dexamethasone  | 0.16 |
| Danazol        | Domperidone    | 0.16 |
| Danazol        | Finasteride    | 0.16 |
| Danazol        | Quinidine      | 0.16 |
| Diltiazem      | Verapamil      | 0.16 |
| Ergocalciferol | Pimozide       | 0.16 |
| Etidronic Acid | Pimozide       | 0.16 |
| Felodipine     | Lovastatin     | 0.16 |
| Imatinib       | Nifedipine     | 0.16 |
| Imipramine     | Metformin      | 0.16 |
| Ketoconazole   | Paclitaxel     | 0.16 |
| Leflunomide    | Metformin      | 0.16 |
| Leflunomide    | Paclitaxel     | 0.16 |
| Lovastatin     | Nifedipine     | 0.16 |
| Minocycline    | Paclitaxel     | 0.16 |

|                  |                   |      |
|------------------|-------------------|------|
| Pimozide         | Testosterone      | 0.16 |
| Progesterone     | Tamoxifen         | 0.16 |
| Testosterone     | Verapamil         | 0.16 |
| Amitriptyline    | Cimetidine        | 0.16 |
| Amitriptyline    | Doxorubicin       | 0.16 |
| Amitriptyline    | Pentoxifylline    | 0.16 |
| Amitriptyline    | Primidone         | 0.16 |
| Amitriptyline    | Simvastatin       | 0.16 |
| Amoxicillin      | Tamoxifen         | 0.16 |
| Celecoxib        | Clozapine         | 0.16 |
| Chloramphenicol  | Meclofenamic Acid | 0.16 |
| Cimetidine       | Haloperidol       | 0.16 |
| Cisapride        | Doxorubicin       | 0.16 |
| Dextromethorphan | Diclofenac        | 0.16 |
| Diclofenac       | Probenecid        | 0.16 |
| Diclofenac       | Saquinavir        | 0.16 |
| Doxorubicin      | Haloperidol       | 0.16 |
| Estradiol        | Sirolimus         | 0.16 |
| Fluoxetine       | Theophylline      | 0.16 |
| Imatinib         | Methotrexate      | 0.16 |
| Irinotecan       | Ketoconazole      | 0.16 |
| Irinotecan       | Leflunomide       | 0.16 |
| Irinotecan       | Minocycline       | 0.16 |
| Mesalazine       | Sulfasalazine     | 0.16 |
| Nifedipine       | Theophylline      | 0.16 |
| Prednisone       | Sirolimus         | 0.16 |
| Progesterone     | Simvastatin       | 0.16 |
| Progesterone     | Valproic Acid     | 0.16 |
| Propranolol      | Tamoxifen         | 0.16 |
| Amitriptyline    | Chloroquine       | 0.16 |
| Amoxicillin      | Doxorubicin       | 0.16 |
| Amoxicillin      | Primidone         | 0.16 |
| Amrinone         | Ergocalciferol    | 0.16 |
| Amrinone         | Etidronic Acid    | 0.16 |
| Amrinone         | Trazodone         | 0.16 |
| Carbamazepine    | Raloxifene        | 0.16 |
| Chloramphenicol  | Mimosine          | 0.16 |
| Cimetidine       | Imipramine        | 0.16 |
| Cimetidine       | Leflunomide       | 0.16 |
| Citalopram       | Dexamethasone     | 0.16 |
| Citalopram       | Quinidine         | 0.16 |
| Clenbuterol      | Estradiol         | 0.16 |
| Clenbuterol      | Fluvoxamine       | 0.16 |

|                    |                   |      |
|--------------------|-------------------|------|
| Dextromethorphan   | Doxorubicin       | 0.16 |
| Dextromethorphan   | Miconazole        | 0.16 |
| Diethylcarbamazine | Lovastatin        | 0.16 |
| Diltiazem          | Ergocalciferol    | 0.16 |
| Diltiazem          | Proguanil         | 0.16 |
| Domperidone        | Folic Acid        | 0.16 |
| Domperidone        | Lidocaine         | 0.16 |
| Doxorubicin        | Ketoconazole      | 0.16 |
| Doxorubicin        | Minocycline       | 0.16 |
| Doxycycline        | Meclofenamic Acid | 0.16 |
| Ergocalciferol     | Etidronic Acid    | 0.16 |
| Estradiol          | Topiramate        | 0.16 |
| Fluvoxamine        | Topiramate        | 0.16 |
| Folic Acid         | Methotrexate      | 0.16 |
| Imatinib           | Lansoprazole      | 0.16 |
| Leflunomide        | Pentoxifylline    | 0.16 |
| Leflunomide        | Primidone         | 0.16 |
| Lovastatin         | Ondansetron       | 0.16 |
| Mephentyoin        | Progesterone      | 0.16 |
| Methotrexate       | Theophylline      | 0.16 |
| Mimosine           | Sirolimus         | 0.16 |
| Pentoxifylline     | Saquinavir        | 0.16 |
| Probenecid         | Simvastatin       | 0.16 |
| Probenecid         | Valproic Acid     | 0.16 |
| Saquinavir         | Simvastatin       | 0.16 |
| Saquinavir         | Valproic Acid     | 0.16 |
| Testosterone       | Trazodone         | 0.16 |
| Amrinone           | Metformin         | 0.16 |
| Amrinone           | Paclitaxel        | 0.16 |
| Carisoprodol       | Clomipramine      | 0.16 |
| Celastrol          | Dexamethasone     | 0.16 |
| Celastrol          | Domperidone       | 0.16 |
| Celecoxib          | Mesalazine        | 0.16 |
| Clomipramine       | Diltiazem         | 0.16 |
| Felodipine         | Progesterone      | 0.16 |
| Fluvoxamine        | Mesalazine        | 0.16 |
| Metformin          | Testosterone      | 0.16 |
| Pimozide           | Primidone         | 0.16 |
| Amitriptyline      | Dexamethasone     | 0.15 |
| Amoxicillin        | Chloroquine       | 0.15 |
| Amoxicillin        | Fluoxetine        | 0.15 |
| Amrinone           | Diclofenac        | 0.15 |
| Amrinone           | Irinotecan        | 0.15 |

|                |                   |      |
|----------------|-------------------|------|
| Amrinone       | Tamoxifen         | 0.15 |
| Carbamazepine  | Mimosine          | 0.15 |
| Carisoprodol   | Triflusal         | 0.15 |
| Celecoxib      | Lovastatin        | 0.15 |
| Chloroquine    | Imipramine        | 0.15 |
| Chloroquine    | Ketoconazole      | 0.15 |
| Cisapride      | Methotrexate      | 0.15 |
| Citalopram     | Risperidone       | 0.15 |
| Citalopram     | Thalidomide       | 0.15 |
| Clenbuterol    | Mimosine          | 0.15 |
| Clenbuterol    | Nitrendipine      | 0.15 |
| Clozapine      | Sirolimus         | 0.15 |
| Dapsone        | Probenecid        | 0.15 |
| Dapsone        | Saquinavir        | 0.15 |
| Dexamethasone  | Haloperidol       | 0.15 |
| Diclofenac     | Etidronic Acid    | 0.15 |
| Doxycycline    | Mimosine          | 0.15 |
| Ergocalciferol | Triflusal         | 0.15 |
| Erythromycin   | Mimosine          | 0.15 |
| Etidronic Acid | Triflusal         | 0.15 |
| Felodipine     | Probenecid        | 0.15 |
| Fluoxetine     | Minocycline       | 0.15 |
| Folic Acid     | Lansoprazole      | 0.15 |
| Hydrocortisone | Leflunomide       | 0.15 |
| Hydrocortisone | Minocycline       | 0.15 |
| Hydrocortisone | Saquinavir        | 0.15 |
| Imipramine     | Nifedipine        | 0.15 |
| Ketoconazole   | Nifedipine        | 0.15 |
| Lansoprazole   | Lidocaine         | 0.15 |
| Leflunomide    | Nifedipine        | 0.15 |
| Lidocaine      | Ondansetron       | 0.15 |
| Lovastatin     | Meclofenamic Acid | 0.15 |
| Mephentyoin    | Minocycline       | 0.15 |
| Mesalazine     | Mimosine          | 0.15 |
| Minocycline    | Nifedipine        | 0.15 |
| Sulfasalazine  | Theophylline      | 0.15 |
| Celastrol      | Meclofenamic Acid | 0.15 |
| Celastrol      | Prednisone        | 0.15 |
| Celastrol      | Raloxifene        | 0.15 |
| Clomipramine   | Pentoxifylline    | 0.15 |
| Clomipramine   | Valproic Acid     | 0.15 |
| Finasteride    | Pimozide          | 0.15 |
| Irinotecan     | Tamoxifen         | 0.15 |

|                  |                   |      |
|------------------|-------------------|------|
| Metformin        | Pentoxifylline    | 0.15 |
| Metformin        | Simvastatin       | 0.15 |
| Pimozide         | Quinidine         | 0.15 |
| Terfenadine      | Testosterone      | 0.15 |
| Amitriptyline    | Sulfasalazine     | 0.15 |
| Amoxicillin      | Domperidone       | 0.15 |
| Amoxicillin      | Methotrexate      | 0.15 |
| Amrinone         | Primidone         | 0.15 |
| Amrinone         | Simvastatin       | 0.15 |
| Carisoprodol     | Simvastatin       | 0.15 |
| Carisoprodol     | Valproic Acid     | 0.15 |
| Celecoxib        | Lidocaine         | 0.15 |
| Chloramphenicol  | Clenbuterol       | 0.15 |
| Cimetidine       | Trazodone         | 0.15 |
| Cisapride        | Lansoprazole      | 0.15 |
| Cisapride        | Ondansetron       | 0.15 |
| Citalopram       | Prednisone        | 0.15 |
| Clenbuterol      | Clozapine         | 0.15 |
| Clozapine        | Doxycycline       | 0.15 |
| Clozapine        | Erythromycin      | 0.15 |
| Dexamethasone    | Dextromethorphan  | 0.15 |
| Dexamethasone    | Leflunomide       | 0.15 |
| Dexamethasone    | Minocycline       | 0.15 |
| Dexamethasone    | Probenecid        | 0.15 |
| Dexamethasone    | Saquinavir        | 0.15 |
| Dextromethorphan | Quinidine         | 0.15 |
| Diltiazem        | Pentoxifylline    | 0.15 |
| Diltiazem        | Simvastatin       | 0.15 |
| Domperidone      | Leflunomide       | 0.15 |
| Doxycycline      | Sirolimus         | 0.15 |
| Ergocalciferol   | Pentoxifylline    | 0.15 |
| Etidronic Acid   | Pentoxifylline    | 0.15 |
| Etidronic Acid   | Simvastatin       | 0.15 |
| Etidronic Acid   | Valproic Acid     | 0.15 |
| Finasteride      | Imipramine        | 0.15 |
| Fluvoxamine      | Theophylline      | 0.15 |
| Folic Acid       | Raloxifene        | 0.15 |
| Imatinib         | Mimosine          | 0.15 |
| Imipramine       | Quinidine         | 0.15 |
| Ketoconazole     | Methotrexate      | 0.15 |
| Lidocaine        | Meclofenamic Acid | 0.15 |
| Lidocaine        | Raloxifene        | 0.15 |
| Lovastatin       | Mimosine          | 0.15 |

|                    |                    |      |
|--------------------|--------------------|------|
| Pentoxifylline     | Testosterone       | 0.15 |
| Primidone          | Testosterone       | 0.15 |
| Proguanil          | Valproic Acid      | 0.15 |
| Simvastatin        | Testosterone       | 0.15 |
| Amitriptyline      | Prednisone         | 0.15 |
| Astemizole         | Probenecid         | 0.15 |
| Buspirone          | Verapamil          | 0.15 |
| Cimetidine         | Irinotecan         | 0.15 |
| Clenbuterol        | Mesalazine         | 0.15 |
| Danazol            | Erythromycin       | 0.15 |
| Diclofenac         | Pentoxifylline     | 0.15 |
| Diethylcarbamazine | Pimozide           | 0.15 |
| Diethylcarbamazine | Verapamil          | 0.15 |
| Haloperidol        | Meclofenamic Acid  | 0.15 |
| Imatinib           | Sirolimus          | 0.15 |
| Irinotecan         | Primidone          | 0.15 |
| Meclofenamic Acid  | Progesterone       | 0.15 |
| Mephénytoin        | Paclitaxel         | 0.15 |
| Mesalazine         | Topiramate         | 0.15 |
| Nifedipine         | Trazodone          | 0.15 |
| Pentoxifylline     | Tamoxifen          | 0.15 |
| Progesterone       | Raloxifene         | 0.15 |
| Domperidone        | Metformin          | 0.15 |
| Estradiol          | Pimozide           | 0.15 |
| Finasteride        | Paclitaxel         | 0.15 |
| Lovastatin         | Mesalazine         | 0.15 |
| Meclofenamic Acid  | Pimozide           | 0.15 |
| Methotrexate       | Paclitaxel         | 0.15 |
| Pentoxifylline     | Terfenadine        | 0.15 |
| Prednisone         | Verapamil          | 0.15 |
| Amitriptyline      | Chloramphenicol    | 0.14 |
| Amitriptyline      | Mesalazine         | 0.14 |
| Amoxicillin        | Diethylcarbamazine | 0.14 |
| Amoxicillin        | Ondansetron        | 0.14 |
| Amoxicillin        | Raloxifene         | 0.14 |
| Amoxicillin        | Risperidone        | 0.14 |
| Amrinone           | Methotrexate       | 0.14 |
| Amrinone           | Quinidine          | 0.14 |
| Astemizole         | Etidronic Acid     | 0.14 |
| Astemizole         | Testosterone       | 0.14 |
| Buspirone          | Metformin          | 0.14 |
| Buspirone          | Saquinavir         | 0.14 |
| Carbamazepine      | Erythromycin       | 0.14 |

|                    |                    |      |
|--------------------|--------------------|------|
| Carisoprodol       | Chloroquine        | 0.14 |
| Carisoprodol       | Dapsone            | 0.14 |
| Carisoprodol       | Dexamethasone      | 0.14 |
| Carisoprodol       | Hydrocortisone     | 0.14 |
| Chloramphenicol    | Folic Acid         | 0.14 |
| Chloramphenicol    | Haloperidol        | 0.14 |
| Chloroquine        | Diclofenac         | 0.14 |
| Chloroquine        | Proguanil          | 0.14 |
| Chloroquine        | Tamoxifen          | 0.14 |
| Cimetidine         | Triflusal          | 0.14 |
| Cisapride          | Mimosine           | 0.14 |
| Citalopram         | Clozapine          | 0.14 |
| Clenbuterol        | Imatinib           | 0.14 |
| Clenbuterol        | Lovastatin         | 0.14 |
| Clomipramine       | Estradiol          | 0.14 |
| Clomipramine       | Ondansetron        | 0.14 |
| Clozapine          | Folic Acid         | 0.14 |
| Clozapine          | Lidocaine          | 0.14 |
| Danazol            | Haloperidol        | 0.14 |
| Dapsone            | Etidronic Acid     | 0.14 |
| Dapsone            | Proguanil          | 0.14 |
| Dapsone            | Terfenadine        | 0.14 |
| Dextromethorphan   | Diethylcarbamazine | 0.14 |
| Diethylcarbamazine | Ketoconazole       | 0.14 |
| Diethylcarbamazine | Leflunomide        | 0.14 |
| Diethylcarbamazine | Metformin          | 0.14 |
| Diethylcarbamazine | Probenecid         | 0.14 |
| Diethylcarbamazine | Propranolol        | 0.14 |
| Diltiazem          | Quinidine          | 0.14 |
| Doxorubicin        | Miconazole         | 0.14 |
| Doxorubicin        | Pentoxifylline     | 0.14 |
| Doxorubicin        | Valproic Acid      | 0.14 |
| Doxycycline        | Erythromycin       | 0.14 |
| Doxycycline        | Lovastatin         | 0.14 |
| Doxycycline        | Topiramate         | 0.14 |
| Erythromycin       | Lovastatin         | 0.14 |
| Estradiol          | Ketoconazole       | 0.14 |
| Etidronic Acid     | Finasteride        | 0.14 |
| Etidronic Acid     | Hydrocortisone     | 0.14 |
| Etidronic Acid     | Quinidine          | 0.14 |
| Fluvoxamine        | Metformin          | 0.14 |
| Fluvoxamine        | Saquinavir         | 0.14 |
| Haloperidol        | Mimosine           | 0.14 |

|                   |                  |      |
|-------------------|------------------|------|
| Imipramine        | Nitrendipine     | 0.14 |
| Ketoconazole      | Ondansetron      | 0.14 |
| Ketoconazole      | Raloxifene       | 0.14 |
| Ketoconazole      | Risperidone      | 0.14 |
| Ketoconazole      | Sulfasalazine    | 0.14 |
| Ketoconazole      | Thalidomide      | 0.14 |
| Lovastatin        | Topiramate       | 0.14 |
| Meclofenamic Acid | Minocycline      | 0.14 |
| Methotrexate      | Proguanil        | 0.14 |
| Methotrexate      | Trazodone        | 0.14 |
| Mimosine          | Progesterone     | 0.14 |
| Mimosine          | Theophylline     | 0.14 |
| Mimosine          | Verapamil        | 0.14 |
| Minocycline       | Prednisone       | 0.14 |
| Nifedipine        | Pentoxifylline   | 0.14 |
| Nitrendipine      | Probenecid       | 0.14 |
| Nitrendipine      | Saquinavir       | 0.14 |
| Ondansetron       | Saquinavir       | 0.14 |
| Paclitaxel        | Sulfasalazine    | 0.14 |
| Pentoxifylline    | Triflusal        | 0.14 |
| Prednisone        | Propranolol      | 0.14 |
| Prednisone        | Saquinavir       | 0.14 |
| Primidone         | Triflusal        | 0.14 |
| Primidone         | Valproic Acid    | 0.14 |
| Probenecid        | Sulfasalazine    | 0.14 |
| Progesterone      | Sirolimus        | 0.14 |
| Quinidine         | Testosterone     | 0.14 |
| Raloxifene        | Saquinavir       | 0.14 |
| Simvastatin       | Valproic Acid    | 0.14 |
| Sirolimus         | Theophylline     | 0.14 |
| Triflusal         | Valproic Acid    | 0.14 |
| Celecoxib         | Terfenadine      | 0.14 |
| Nitrendipine      | Tamoxifen        | 0.14 |
| Prednisone        | Terfenadine      | 0.14 |
| Amoxicillin       | Danazol          | 0.14 |
| Astemizole        | Cimetidine       | 0.14 |
| Carbamazepine     | Verapamil        | 0.14 |
| Clenbuterol       | Pimozide         | 0.14 |
| Clenbuterol       | Verapamil        | 0.14 |
| Danazol           | Dextromethorphan | 0.14 |
| Danazol           | Leflunomide      | 0.14 |
| Danazol           | Probenecid       | 0.14 |
| Danazol           | Propranolol      | 0.14 |



|                    |                   |      |
|--------------------|-------------------|------|
| Diclofenac         | Meclofenamic Acid | 0.14 |
| Domperidone        | Felodipine        | 0.14 |
| Doxycycline        | Verapamil         | 0.14 |
| Felodipine         | Finasteride       | 0.14 |
| Finasteride        | Nifedipine        | 0.14 |
| Imatinib           | Progesterone      | 0.14 |
| Irinotecan         | Meclofenamic Acid | 0.14 |
| Irinotecan         | Raloxifene        | 0.14 |
| Ketoconazole       | Mesalazine        | 0.14 |
| Mesalazine         | Minocycline       | 0.14 |
| Mesalazine         | Propranolol       | 0.14 |
| Mesalazine         | Saquinavir        | 0.14 |
| Metformin          | Mimosine          | 0.14 |
| Terfenadine        | Thalidomide       | 0.14 |
| Topiramate         | Verapamil         | 0.14 |
| Amitriptyline      | Erythromycin      | 0.14 |
| Amoxicillin        | Sirolimus         | 0.14 |
| Amrinone           | Celecoxib         | 0.14 |
| Amrinone           | Meclofenamic Acid | 0.14 |
| Amrinone           | Prednisone        | 0.14 |
| Buspirone          | Tamoxifen         | 0.14 |
| Carbamazepine      | Progesterone      | 0.14 |
| Celecoxib          | Diltiazem         | 0.14 |
| Celecoxib          | Proguanil         | 0.14 |
| Chloramphenicol    | Dextromethorphan  | 0.14 |
| Chloramphenicol    | Imipramine        | 0.14 |
| Chloramphenicol    | Ketoconazole      | 0.14 |
| Chloramphenicol    | Propranolol       | 0.14 |
| Chloramphenicol    | Saquinavir        | 0.14 |
| Chloroquine        | Nifedipine        | 0.14 |
| Cimetidine         | Quinidine         | 0.14 |
| Clenbuterol        | Haloperidol       | 0.14 |
| Clozapine          | Minocycline       | 0.14 |
| Clozapine          | Probenecid        | 0.14 |
| Dapsone            | Nifedipine        | 0.14 |
| Dexamethasone      | Primidone         | 0.14 |
| Diclofenac         | Lansoprazole      | 0.14 |
| Diclofenac         | Sulfasalazine     | 0.14 |
| Diclofenac         | Thalidomide       | 0.14 |
| Diethylcarbamazine | Tamoxifen         | 0.14 |
| Domperidone        | Miconazole        | 0.14 |
| Domperidone        | Pentoxifylline    | 0.14 |
| Domperidone        | Primidone         | 0.14 |

|                   |                |      |
|-------------------|----------------|------|
| Domperidone       | Valproic Acid  | 0.14 |
| Doxorubicin       | Finasteride    | 0.14 |
| Doxycycline       | Progesterone   | 0.14 |
| Ergocalciferol    | Prednisone     | 0.14 |
| Erythromycin      | Haloperidol    | 0.14 |
| Erythromycin      | Progesterone   | 0.14 |
| Estradiol         | Proguanil      | 0.14 |
| Etidronic Acid    | Fluvoxamine    | 0.14 |
| Etidronic Acid    | Raloxifene     | 0.14 |
| Felodipine        | Hydrocortisone | 0.14 |
| Finasteride       | Primidone      | 0.14 |
| Fluvoxamine       | Trazodone      | 0.14 |
| Imipramine        | Sirolimus      | 0.14 |
| Lidocaine         | Lovastatin     | 0.14 |
| Meclofenamic Acid | Testosterone   | 0.14 |
| Methotrexate      | Valproic Acid  | 0.14 |
| Nifedipine        | Tolbutamide    | 0.14 |
| Prednisone        | Proguanil      | 0.14 |
| Prednisone        | Testosterone   | 0.14 |
| Proguanil         | Raloxifene     | 0.14 |
| Quinidine         | Simvastatin    | 0.14 |
| Quinidine         | Valproic Acid  | 0.14 |
| Raloxifene        | Trazodone      | 0.14 |
| Risperidone       | Tamoxifen      | 0.14 |
| Danazol           | Tamoxifen      | 0.14 |
| Amoxicillin       | Mimosine       | 0.13 |
| Amrinone          | Buspirone      | 0.13 |
| Amrinone          | Lansoprazole   | 0.13 |
| Astemizole        | Quinidine      | 0.13 |
| Buspirone         | Proguanil      | 0.13 |
| Carisoprodol      | Danazol        | 0.13 |
| Carisoprodol      | Sulfasalazine  | 0.13 |
| Celastrol         | Leflunomide    | 0.13 |
| Chloramphenicol   | Tamoxifen      | 0.13 |
| Cimetidine        | Dapsone        | 0.13 |
| Cimetidine        | Hydrocortisone | 0.13 |
| Cimetidine        | Tolbutamide    | 0.13 |
| Citalopram        | Verapamil      | 0.13 |
| Clenbuterol       | Lidocaine      | 0.13 |
| Clenbuterol       | Metformin      | 0.13 |
| Clenbuterol       | Paclitaxel     | 0.13 |
| Clenbuterol       | Theophylline   | 0.13 |
| Clomipramine      | Erythromycin   | 0.13 |

|                    |                   |      |
|--------------------|-------------------|------|
| Clozapine          | Irinotecan        | 0.13 |
| Danazol            | Proguanil         | 0.13 |
| Diethylcarbamazine | Etidronic Acid    | 0.13 |
| Diethylcarbamazine | Proguanil         | 0.13 |
| Diltiazem          | Lansoprazole      | 0.13 |
| Diltiazem          | Sulfasalazine     | 0.13 |
| Doxorubicin        | Mephenytoin       | 0.13 |
| Ergocalciferol     | Lansoprazole      | 0.13 |
| Ergocalciferol     | Risperidone       | 0.13 |
| Erythromycin       | Folic Acid        | 0.13 |
| Erythromycin       | Paclitaxel        | 0.13 |
| Erythromycin       | Theophylline      | 0.13 |
| Estradiol          | Fluoxetine        | 0.13 |
| Etidronic Acid     | Mesalazine        | 0.13 |
| Etidronic Acid     | Sulfasalazine     | 0.13 |
| Fluoxetine         | Meclofenamic Acid | 0.13 |
| Lansoprazole       | Testosterone      | 0.13 |
| Mephenytoin        | Primidone         | 0.13 |
| Miconazole         | Tolbutamide       | 0.13 |
| Mimosine           | Probenecid        | 0.13 |
| Mimosine           | Propranolol       | 0.13 |
| Nifedipine         | Prednisone        | 0.13 |
| Ondansetron        | Testosterone      | 0.13 |
| Pentoxifylline     | Tolbutamide       | 0.13 |
| Simvastatin        | Tolbutamide       | 0.13 |
| Sulfasalazine      | Testosterone      | 0.13 |
| Thalidomide        | Trazodone         | 0.13 |
| Cisapride          | Metformin         | 0.13 |
| Amitriptyline      | Citalopram        | 0.13 |
| Amitriptyline      | Folic Acid        | 0.13 |
| Amoxicillin        | Lovastatin        | 0.13 |
| Amrinone           | Sirolimus         | 0.13 |
| Astemizole         | Mephenytoin       | 0.13 |
| Buspirone          | Nifedipine        | 0.13 |
| Celecoxib          | Simvastatin       | 0.13 |
| Chloramphenicol    | Diltiazem         | 0.13 |
| Chloramphenicol    | Ergocalciferol    | 0.13 |
| Chloramphenicol    | Etidronic Acid    | 0.13 |
| Cimetidine         | Estradiol         | 0.13 |
| Cimetidine         | Meclofenamic Acid | 0.13 |
| Cimetidine         | Prednisone        | 0.13 |
| Cisapride          | Citalopram        | 0.13 |
| Cisapride          | Lidocaine         | 0.13 |

|                 |                  |      |
|-----------------|------------------|------|
| Citalopram      | Progesterone     | 0.13 |
| Dexamethasone   | Domperidone      | 0.13 |
| Dexamethasone   | Quinidine        | 0.13 |
| Domperidone     | Methotrexate     | 0.13 |
| Doxorubicin     | Fluvoxamine      | 0.13 |
| Doxorubicin     | Prednisone       | 0.13 |
| Finasteride     | Methotrexate     | 0.13 |
| Finasteride     | Quinidine        | 0.13 |
| Fluoxetine      | Risperidone      | 0.13 |
| Fluoxetine      | Sulfasalazine    | 0.13 |
| Fluvoxamine     | Simvastatin      | 0.13 |
| Imatinib        | Ketoconazole     | 0.13 |
| Imatinib        | Leflunomide      | 0.13 |
| Imatinib        | Probenecid       | 0.13 |
| Lansoprazole    | Nifedipine       | 0.13 |
| Lovastatin      | Minocycline      | 0.13 |
| Methotrexate    | Quinidine        | 0.13 |
| Mimosine        | Tamoxifen        | 0.13 |
| Nifedipine      | Risperidone      | 0.13 |
| Nifedipine      | Thalidomide      | 0.13 |
| Nitrendipine    | Triflusal        | 0.13 |
| Prednisone      | Primidone        | 0.13 |
| Progesterone    | Theophylline     | 0.13 |
| Raloxifene      | Valproic Acid    | 0.13 |
| Sirolimus       | Testosterone     | 0.13 |
| Carbamazepine   | Terfenadine      | 0.13 |
| Chloramphenicol | Nifedipine       | 0.13 |
| Clenbuterol     | Terfenadine      | 0.13 |
| Danazol         | Primidone        | 0.13 |
| Danazol         | Simvastatin      | 0.13 |
| Domperidone     | Nitrendipine     | 0.13 |
| Doxorubicin     | Mesalazine       | 0.13 |
| Mesalazine      | Miconazole       | 0.13 |
| Mesalazine      | Simvastatin      | 0.13 |
| Amitriptyline   | Amoxicillin      | 0.13 |
| Amitriptyline   | Dextromethorphan | 0.13 |
| Amitriptyline   | Leflunomide      | 0.13 |
| Amitriptyline   | Propranolol      | 0.13 |
| Amoxicillin     | Cisapride        | 0.13 |
| Amoxicillin     | Clomipramine     | 0.13 |
| Amoxicillin     | Doxycycline      | 0.13 |
| Amoxicillin     | Erythromycin     | 0.13 |
| Amrinone        | Imatinib         | 0.13 |

|                    |                  |      |
|--------------------|------------------|------|
| Amrinone           | Mimosine         | 0.13 |
| Astemizole         | Thalidomide      | 0.13 |
| Carbamazepine      | Imipramine       | 0.13 |
| Carbamazepine      | Probenecid       | 0.13 |
| Carbamazepine      | Saquinavir       | 0.13 |
| Celastrol          | Doxorubicin      | 0.13 |
| Celecoxib          | Methotrexate     | 0.13 |
| Celecoxib          | Nitrendipine     | 0.13 |
| Chloramphenicol    | Doxorubicin      | 0.13 |
| Chloramphenicol    | Pentoxifylline   | 0.13 |
| Chloroquine        | Finasteride      | 0.13 |
| Cimetidine         | Ondansetron      | 0.13 |
| Cimetidine         | Sulfasalazine    | 0.13 |
| Cisapride          | Dextromethorphan | 0.13 |
| Cisapride          | Irinotecan       | 0.13 |
| Cisapride          | Saquinavir       | 0.13 |
| Clenbuterol        | Diclofenac       | 0.13 |
| Clenbuterol        | Ketoconazole     | 0.13 |
| Clozapine          | Primidone        | 0.13 |
| Dapsone            | Dexamethasone    | 0.13 |
| Dapsone            | Finasteride      | 0.13 |
| Dexamethasone      | Mephenytoin      | 0.13 |
| Dexamethasone      | Raloxifene       | 0.13 |
| Diclofenac         | Topiramate       | 0.13 |
| Diethylcarbamazine | Pentoxifylline   | 0.13 |
| Diethylcarbamazine | Primidone        | 0.13 |
| Diethylcarbamazine | Simvastatin      | 0.13 |
| Diethylcarbamazine | Valproic Acid    | 0.13 |
| Diltiazem          | Imatinib         | 0.13 |
| Diltiazem          | Lovastatin       | 0.13 |
| Diltiazem          | Mimosine         | 0.13 |
| Domperidone        | Mephenytoin      | 0.13 |
| Domperidone        | Mesalazine       | 0.13 |
| Doxorubicin        | Ondansetron      | 0.13 |
| Doxycycline        | Probenecid       | 0.13 |
| Ergocalciferol     | Verapamil        | 0.13 |
| Erythromycin       | Imipramine       | 0.13 |
| Erythromycin       | Ketoconazole     | 0.13 |
| Estradiol          | Nitrendipine     | 0.13 |
| Estradiol          | Quinidine        | 0.13 |
| Felodipine         | Mimosine         | 0.13 |
| Finasteride        | Hydrocortisone   | 0.13 |
| Finasteride        | Mephenytoin      | 0.13 |

|                   |                |      |
|-------------------|----------------|------|
| Haloperidol       | Ketoconazole   | 0.13 |
| Haloperidol       | Leflunomide    | 0.13 |
| Haloperidol       | Saquinavir     | 0.13 |
| Hydrocortisone    | Triflusal      | 0.13 |
| Imipramine        | Paclitaxel     | 0.13 |
| Ketoconazole      | Topiramate     | 0.13 |
| Lansoprazole      | Simvastatin    | 0.13 |
| Leflunomide       | Progesterone   | 0.13 |
| Leflunomide       | Topiramate     | 0.13 |
| Lovastatin        | Trazodone      | 0.13 |
| Meclofenamic Acid | Triflusal      | 0.13 |
| Mephénytoin       | Triflusal      | 0.13 |
| Mesalazine        | Methotrexate   | 0.13 |
| Mesalazine        | Triflusal      | 0.13 |
| Metformin         | Tamoxifen      | 0.13 |
| Methotrexate      | Prednisone     | 0.13 |
| Miconazole        | Risperidone    | 0.13 |
| Mimosine          | Testosterone   | 0.13 |
| Minocycline       | Progesterone   | 0.13 |
| Minocycline       | Topiramate     | 0.13 |
| Nitrendipine      | Prednisone     | 0.13 |
| Ondansetron       | Primidone      | 0.13 |
| Primidone         | Risperidone    | 0.13 |
| Probenecid        | Topiramate     | 0.13 |
| Progesterone      | Saquinavir     | 0.13 |
| Quinidine         | Raloxifene     | 0.13 |
| Simvastatin       | Sulfasalazine  | 0.13 |
| Tamoxifen         | Topiramate     | 0.13 |
| Amrinone          | Clomipramine   | 0.12 |
| Celastrol         | Finasteride    | 0.12 |
| Celecoxib         | Danazol        | 0.12 |
| Danazol           | Prednisone     | 0.12 |
| Doxorubicin       | Pimozide       | 0.12 |
| Etidronic Acid    | Paclitaxel     | 0.12 |
| Felodipine        | Haloperidol    | 0.12 |
| Ketoconazole      | Terfenadine    | 0.12 |
| Minocycline       | Terfenadine    | 0.12 |
| Primidone         | Verapamil      | 0.12 |
| Amitriptyline     | Ergocalciferol | 0.12 |
| Amitriptyline     | Trazodone      | 0.12 |
| Amrinone          | Haloperidol    | 0.12 |
| Astemizole        | Mimosine       | 0.12 |
| Carbamazepine     | Felodipine     | 0.12 |

|                    |                  |      |
|--------------------|------------------|------|
| Carisoprodol       | Progesterone     | 0.12 |
| Chloramphenicol    | Dexamethasone    | 0.12 |
| Chloramphenicol    | Quinidine        | 0.12 |
| Citalopram         | Irinotecan       | 0.12 |
| Clenbuterol        | Felodipine       | 0.12 |
| Clozapine          | Dexamethasone    | 0.12 |
| Danazol            | Hydrocortisone   | 0.12 |
| Diclofenac         | Folic Acid       | 0.12 |
| Diethylcarbamazine | Nitrendipine     | 0.12 |
| Diltiazem          | Haloperidol      | 0.12 |
| Doxycycline        | Nifedipine       | 0.12 |
| Erythromycin       | Felodipine       | 0.12 |
| Erythromycin       | Fluoxetine       | 0.12 |
| Felodipine         | Topiramate       | 0.12 |
| Folic Acid         | Tamoxifen        | 0.12 |
| Haloperidol        | Testosterone     | 0.12 |
| Meclofenamic Acid  | Prednisone       | 0.12 |
| Meclofenamic Acid  | Raloxifene       | 0.12 |
| Nitrendipine       | Ondansetron      | 0.12 |
| Quinidine          | Sirolimus        | 0.12 |
| Amoxicillin        | Folic Acid       | 0.12 |
| Amrinone           | Clenbuterol      | 0.12 |
| Amrinone           | Topiramate       | 0.12 |
| Buspirone          | Quinidine        | 0.12 |
| Carbamazepine      | Testosterone     | 0.12 |
| Carisoprodol       | Terfenadine      | 0.12 |
| Celastrol          | Fluvoxamine      | 0.12 |
| Celecoxib          | Chloroquine      | 0.12 |
| Celecoxib          | Dapsone          | 0.12 |
| Celecoxib          | Hydrocortisone   | 0.12 |
| Chloroquine        | Fluvoxamine      | 0.12 |
| Chloroquine        | Raloxifene       | 0.12 |
| Citalopram         | Dextromethorphan | 0.12 |
| Citalopram         | Probenecid       | 0.12 |
| Citalopram         | Saquinavir       | 0.12 |
| Clenbuterol        | Ergocalciferol   | 0.12 |
| Dapsone            | Estradiol        | 0.12 |
| Dapsone            | Raloxifene       | 0.12 |
| Dexamethasone      | Sulfasalazine    | 0.12 |
| Diethylcarbamazine | Domperidone      | 0.12 |
| Diethylcarbamazine | Quinidine        | 0.12 |
| Diltiazem          | Topiramate       | 0.12 |
| Domperidone        | Thalidomide      | 0.12 |

|                 |                   |      |
|-----------------|-------------------|------|
| Doxorubicin     | Mimosine          | 0.12 |
| Doxorubicin     | Paclitaxel        | 0.12 |
| Doxycycline     | Proguanil         | 0.12 |
| Ergocalciferol  | Erythromycin      | 0.12 |
| Estradiol       | Hydrocortisone    | 0.12 |
| Estradiol       | Mephenytoin       | 0.12 |
| Estradiol       | Tolbutamide       | 0.12 |
| Etidronic Acid  | Terfenadine       | 0.12 |
| Etidronic Acid  | Topiramate        | 0.12 |
| Finasteride     | Risperidone       | 0.12 |
| Finasteride     | Sulfasalazine     | 0.12 |
| Finasteride     | Thalidomide       | 0.12 |
| Hydrocortisone  | Meclofenamic Acid | 0.12 |
| Hydrocortisone  | Raloxifene        | 0.12 |
| Imatinib        | Nitrendipine      | 0.12 |
| Ketoconazole    | Lidocaine         | 0.12 |
| Lidocaine       | Minocycline       | 0.12 |
| Lidocaine       | Saquinavir        | 0.12 |
| Methotrexate    | Risperidone       | 0.12 |
| Miconazole      | Mimosine          | 0.12 |
| Prednisone      | Tolbutamide       | 0.12 |
| Proguanil       | Topiramate        | 0.12 |
| Quinidine       | Risperidone       | 0.12 |
| Raloxifene      | Tolbutamide       | 0.12 |
| Astemizole      | Clenbuterol       | 0.12 |
| Astemizole      | Doxycycline       | 0.12 |
| Buspirone       | Mesalazine        | 0.12 |
| Celecoxib       | Chloramphenicol   | 0.12 |
| Chloramphenicol | Estradiol         | 0.12 |
| Chloramphenicol | Fluvoxamine       | 0.12 |
| Chloramphenicol | Prednisone        | 0.12 |
| Citalopram      | Fluoxetine        | 0.12 |
| Clozapine       | Meclofenamic Acid | 0.12 |
| Danazol         | Lansoprazole      | 0.12 |
| Danazol         | Thalidomide       | 0.12 |
| Diclofenac      | Imipramine        | 0.12 |
| Diclofenac      | Leflunomide       | 0.12 |
| Felodipine      | Folic Acid        | 0.12 |
| Fluoxetine      | Lidocaine         | 0.12 |
| Folic Acid      | Nifedipine        | 0.12 |
| Haloperidol     | Pentoxifylline    | 0.12 |
| Imatinib        | Quinidine         | 0.12 |
| Irinotecan      | Propranolol       | 0.12 |



|                    |                    |      |
|--------------------|--------------------|------|
| Meclofenamic Acid  | Sirolimus          | 0.12 |
| Mimosine           | Nitrendipine       | 0.12 |
| Probenecid         | Tamoxifen          | 0.12 |
| Diclofenac         | Fluoxetine         | 0.11 |
| Pimozide           | Prednisone         | 0.11 |
| Primidone          | Terfenadine        | 0.11 |
| Amoxicillin        | Felodipine         | 0.11 |
| Amoxicillin        | Imipramine         | 0.11 |
| Amoxicillin        | Minocycline        | 0.11 |
| Amrinone           | Folic Acid         | 0.11 |
| Astemizole         | Theophylline       | 0.11 |
| Buspirone          | Celastrol          | 0.11 |
| Buspirone          | Meclofenamic Acid  | 0.11 |
| Buspirone          | Triflusal          | 0.11 |
| Carbamazepine      | Cimetidine         | 0.11 |
| Carbamazepine      | Simvastatin        | 0.11 |
| Carisoprodol       | Irinotecan         | 0.11 |
| Carisoprodol       | Tamoxifen          | 0.11 |
| Celecoxib          | Diethylcarbamazine | 0.11 |
| Celecoxib          | Lansoprazole       | 0.11 |
| Celecoxib          | Metformin          | 0.11 |
| Celecoxib          | Sulfasalazine      | 0.11 |
| Chloramphenicol    | Dapsone            | 0.11 |
| Chloroquine        | Clozapine          | 0.11 |
| Chloroquine        | Tolbutamide        | 0.11 |
| Chloroquine        | Verapamil          | 0.11 |
| Cimetidine         | Doxycycline        | 0.11 |
| Citalopram         | Diltiazem          | 0.11 |
| Citalopram         | Ergocalciferol     | 0.11 |
| Citalopram         | Trazodone          | 0.11 |
| Clenbuterol        | Pentoxifylline     | 0.11 |
| Clenbuterol        | Primidone          | 0.11 |
| Clenbuterol        | Valproic Acid      | 0.11 |
| Clozapine          | Hydrocortisone     | 0.11 |
| Clozapine          | Tolbutamide        | 0.11 |
| Dapsone            | Mephenytoin        | 0.11 |
| Dapsone            | Tolbutamide        | 0.11 |
| Dexamethasone      | Terfenadine        | 0.11 |
| Dextromethorphan   | Imipramine         | 0.11 |
| Dextromethorphan   | Ketoconazole       | 0.11 |
| Diclofenac         | Proguanil          | 0.11 |
| Diethylcarbamazine | Estradiol          | 0.11 |
| Diethylcarbamazine | Meclofenamic Acid  | 0.11 |

|                    |                |      |
|--------------------|----------------|------|
| Diethylcarbamazine | Prednisone     | 0.11 |
| Diethylcarbamazine | Triflusal      | 0.11 |
| Diltiazem          | Tamoxifen      | 0.11 |
| Domperidone        | Progesterone   | 0.11 |
| Doxorubicin        | Erythromycin   | 0.11 |
| Doxorubicin        | Topiramate     | 0.11 |
| Doxycycline        | Miconazole     | 0.11 |
| Ergocalciferol     | Folic Acid     | 0.11 |
| Ergocalciferol     | Theophylline   | 0.11 |
| Erythromycin       | Pentoxifylline | 0.11 |
| Erythromycin       | Simvastatin    | 0.11 |
| Estradiol          | Lansoprazole   | 0.11 |
| Estradiol          | Ondansetron    | 0.11 |
| Estradiol          | Paclitaxel     | 0.11 |
| Estradiol          | Sulfasalazine  | 0.11 |
| Etidronic Acid     | Irinotecan     | 0.11 |
| Felodipine         | Imipramine     | 0.11 |
| Fluoxetine         | Ketoconazole   | 0.11 |
| Fluoxetine         | Probenecid     | 0.11 |
| Fluvoxamine        | Ondansetron    | 0.11 |
| Folic Acid         | Proguanil      | 0.11 |
| Folic Acid         | Testosterone   | 0.11 |
| Hydrocortisone     | Mephenytoin    | 0.11 |
| Hydrocortisone     | Sirolimus      | 0.11 |
| Hydrocortisone     | Tolbutamide    | 0.11 |
| Hydrocortisone     | Verapamil      | 0.11 |
| Imipramine         | Leflunomide    | 0.11 |
| Imipramine         | Minocycline    | 0.11 |
| Imipramine         | Propranolol    | 0.11 |
| Ketoconazole       | Leflunomide    | 0.11 |
| Ketoconazole       | Propranolol    | 0.11 |
| Lansoprazole       | Raloxifene     | 0.11 |
| Lansoprazole       | Triflusal      | 0.11 |
| Lidocaine          | Trazodone      | 0.11 |
| Meclofenamic Acid  | Sulfasalazine  | 0.11 |
| Mephenytoin        | Pimozide       | 0.11 |
| Mephenytoin        | Tolbutamide    | 0.11 |
| Mephenytoin        | Verapamil      | 0.11 |
| Metformin          | Triflusal      | 0.11 |
| Nifedipine         | Probenecid     | 0.11 |
| Nifedipine         | Saquinavir     | 0.11 |
| Nitrendipine       | Topiramate     | 0.11 |
| Paclitaxel         | Raloxifene     | 0.11 |

|                 |                  |      |
|-----------------|------------------|------|
| Prednisone      | Risperidone      | 0.11 |
| Prednisone      | Sulfasalazine    | 0.11 |
| Probenecid      | Propranolol      | 0.11 |
| Probenecid      | Saquinavir       | 0.11 |
| Raloxifene      | Thalidomide      | 0.11 |
| Sulfasalazine   | Triflusal        | 0.11 |
| Tamoxifen       | Testosterone     | 0.11 |
| Thalidomide     | Triflusal        | 0.11 |
| Estradiol       | Terfenadine      | 0.11 |
| Imatinib        | Verapamil        | 0.11 |
| Amrinone        | Felodipine       | 0.11 |
| Buspirone       | Pimozide         | 0.11 |
| Carbamazepine   | Danazol          | 0.11 |
| Chloroquine     | Metformin        | 0.11 |
| Clomipramine    | Hydrocortisone   | 0.11 |
| Clomipramine    | Mephenytoin      | 0.11 |
| Danazol         | Topiramate       | 0.11 |
| Dapsone         | Metformin        | 0.11 |
| Diclofenac      | Miconazole       | 0.11 |
| Diltiazem       | Nifedipine       | 0.11 |
| Ergocalciferol  | Fluoxetine       | 0.11 |
| Etidronic Acid  | Felodipine       | 0.11 |
| Etidronic Acid  | Fluoxetine       | 0.11 |
| Hydrocortisone  | Metformin        | 0.11 |
| Mephenytoin     | Metformin        | 0.11 |
| Thalidomide     | Verapamil        | 0.11 |
| Amitriptyline   | Triflusal        | 0.11 |
| Amoxicillin     | Amrinone         | 0.11 |
| Amoxicillin     | Testosterone     | 0.11 |
| Amrinone        | Dextromethorphan | 0.11 |
| Amrinone        | Imipramine       | 0.11 |
| Carbamazepine   | Methotrexate     | 0.11 |
| Carisoprodol    | Dextromethorphan | 0.11 |
| Carisoprodol    | Leflunomide      | 0.11 |
| Carisoprodol    | Minocycline      | 0.11 |
| Carisoprodol    | Saquinavir       | 0.11 |
| Celecoxib       | Mimosine         | 0.11 |
| Chloramphenicol | Lansoprazole     | 0.11 |
| Chloramphenicol | Risperidone      | 0.11 |
| Chloramphenicol | Sulfasalazine    | 0.11 |
| Chloramphenicol | Thalidomide      | 0.11 |
| Chloroquine     | Imatinib         | 0.11 |
| Cimetidine      | Folic Acid       | 0.11 |

|                  |                    |      |
|------------------|--------------------|------|
| Cimetidine       | Lidocaine          | 0.11 |
| Cisapride        | Triflusal          | 0.11 |
| Clenbuterol      | Domperidone        | 0.11 |
| Clenbuterol      | Methotrexate       | 0.11 |
| Clozapine        | Diethylcarbamazine | 0.11 |
| Clozapine        | Ondansetron        | 0.11 |
| Clozapine        | Thalidomide        | 0.11 |
| Dapsone          | Imatinib           | 0.11 |
| Dexamethasone    | Doxycycline        | 0.11 |
| Dextromethorphan | Ergocalciferol     | 0.11 |
| Dextromethorphan | Etidronic Acid     | 0.11 |
| Dextromethorphan | Proguanil          | 0.11 |
| Diltiazem        | Imipramine         | 0.11 |
| Diltiazem        | Ketoconazole       | 0.11 |
| Diltiazem        | Leflunomide        | 0.11 |
| Diltiazem        | Saquinavir         | 0.11 |
| Doxorubicin      | Folic Acid         | 0.11 |
| Doxorubicin      | Lidocaine          | 0.11 |
| Ergocalciferol   | Imipramine         | 0.11 |
| Ergocalciferol   | Leflunomide        | 0.11 |
| Estradiol        | Mimosine           | 0.11 |
| Hydrocortisone   | Imatinib           | 0.11 |
| Imatinib         | Tolbutamide        | 0.11 |
| Imipramine       | Trazodone          | 0.11 |
| Ketoconazole     | Proguanil          | 0.11 |
| Ketoconazole     | Testosterone       | 0.11 |
| Leflunomide      | Proguanil          | 0.11 |
| Lidocaine        | Miconazole         | 0.11 |
| Lidocaine        | Primidone          | 0.11 |
| Methotrexate     | Topiramate         | 0.11 |
| Miconazole       | Theophylline       | 0.11 |
| Mimosine         | Prednisone         | 0.11 |
| Mimosine         | Raloxifene         | 0.11 |
| Probenecid       | Trazodone          | 0.11 |
| Risperidone      | Sirolimus          | 0.11 |
| Saquinavir       | Testosterone       | 0.11 |
| Sirolimus        | Sulfasalazine      | 0.11 |
| Amrinone         | Astemizole         | 0.10 |
| Astemizole       | Carisoprodol       | 0.10 |
| Astemizole       | Diltiazem          | 0.10 |
| Buspirone        | Paclitaxel         | 0.10 |
| Carbamazepine    | Celastrol          | 0.10 |
| Celastrol        | Clenbuterol        | 0.10 |

|                    |                |      |
|--------------------|----------------|------|
| Celastrol          | Topiramate     | 0.10 |
| Chloroquine        | Terfenadine    | 0.10 |
| Cimetidine         | Felodipine     | 0.10 |
| Cimetidine         | Fluoxetine     | 0.10 |
| Danazol            | Folic Acid     | 0.10 |
| Danazol            | Lidocaine      | 0.10 |
| Diclofenac         | Domperidone    | 0.10 |
| Diethylcarbamazine | Paclitaxel     | 0.10 |
| Domperidone        | Irinotecan     | 0.10 |
| Felodipine         | Primidone      | 0.10 |
| Felodipine         | Valproic Acid  | 0.10 |
| Fluoxetine         | Pentoxifylline | 0.10 |
| Fluoxetine         | Primidone      | 0.10 |
| Folic Acid         | Mesalazine     | 0.10 |
| Hydrocortisone     | Terfenadine    | 0.10 |
| Leflunomide        | Nitrendipine   | 0.10 |
| Metformin          | Sulfasalazine  | 0.10 |
| Metformin          | Thalidomide    | 0.10 |
| Minocycline        | Nitrendipine   | 0.10 |
| Nifedipine         | Primidone      | 0.10 |
| Nitrendipine       | Propranolol    | 0.10 |
| Paclitaxel         | Risperidone    | 0.10 |
| Haloperidol        | Metformin      | 0.10 |
| Amitriptyline      | Dapsone        | 0.10 |
| Amitriptyline      | Hydrocortisone | 0.10 |
| Amitriptyline      | Tolbutamide    | 0.10 |
| Amoxicillin        | Valproic Acid  | 0.10 |
| Amrinone           | Carisoprodol   | 0.10 |
| Amrinone           | Diltiazem      | 0.10 |
| Amrinone           | Proguanil      | 0.10 |
| Buspirone          | Dapsone        | 0.10 |
| Buspirone          | Hydrocortisone | 0.10 |
| Buspirone          | Mephénytoin    | 0.10 |
| Carbamazepine      | Pimozide       | 0.10 |
| Celecoxib          | Clenbuterol    | 0.10 |
| Celecoxib          | Diclofenac     | 0.10 |
| Celecoxib          | Erythromycin   | 0.10 |
| Chloroquine        | Haloperidol    | 0.10 |
| Chloroquine        | Ondansetron    | 0.10 |
| Chloroquine        | Risperidone    | 0.10 |
| Cimetidine         | Propranolol    | 0.10 |
| Cisapride          | Dapsone        | 0.10 |
| Cisapride          | Mephénytoin    | 0.10 |

|                    |                   |      |
|--------------------|-------------------|------|
| Cisapride          | Tolbutamide       | 0.10 |
| Citalopram         | Methotrexate      | 0.10 |
| Clenbuterol        | Meclofenamic Acid | 0.10 |
| Clenbuterol        | Raloxifene        | 0.10 |
| Danazol            | Minocycline       | 0.10 |
| Dapsone            | Ondansetron       | 0.10 |
| Dapsone            | Risperidone       | 0.10 |
| Dexamethasone      | Folic Acid        | 0.10 |
| Dexamethasone      | Lidocaine         | 0.10 |
| Diethylcarbamazine | Hydrocortisone    | 0.10 |
| Diethylcarbamazine | Imatinib          | 0.10 |
| Diethylcarbamazine | Mephenytoin       | 0.10 |
| Diethylcarbamazine | Terfenadine       | 0.10 |
| Diethylcarbamazine | Tolbutamide       | 0.10 |
| Diltiazem          | Etidronic Acid    | 0.10 |
| Domperidone        | Theophylline      | 0.10 |
| Doxorubicin        | Imipramine        | 0.10 |
| Doxorubicin        | Leflunomide       | 0.10 |
| Doxorubicin        | Propranolol       | 0.10 |
| Ergocalciferol     | Proguanil         | 0.10 |
| Ergocalciferol     | Testosterone      | 0.10 |
| Ergocalciferol     | Trazodone         | 0.10 |
| Erythromycin       | Pimozide          | 0.10 |
| Erythromycin       | Prednisone        | 0.10 |
| Etidronic Acid     | Trazodone         | 0.10 |
| Fluvoxamine        | Irinotecan        | 0.10 |
| Haloperidol        | Tolbutamide       | 0.10 |
| Hydrocortisone     | Lansoprazole      | 0.10 |
| Hydrocortisone     | Risperidone       | 0.10 |
| Imatinib           | Ondansetron       | 0.10 |
| Imatinib           | Sulfasalazine     | 0.10 |
| Imatinib           | Thalidomide       | 0.10 |
| Imipramine         | Mesalazine        | 0.10 |
| Imipramine         | Primidone         | 0.10 |
| Ketoconazole       | Miconazole        | 0.10 |
| Ketoconazole       | Pentoxifylline    | 0.10 |
| Ketoconazole       | Primidone         | 0.10 |
| Ketoconazole       | Valproic Acid     | 0.10 |
| Lansoprazole       | Lovastatin        | 0.10 |
| Lansoprazole       | Tolbutamide       | 0.10 |
| Leflunomide        | Miconazole        | 0.10 |
| Leflunomide        | Valproic Acid     | 0.10 |
| Lidocaine          | Methotrexate      | 0.10 |

|                 |                    |      |
|-----------------|--------------------|------|
| Lidocaine       | Quinidine          | 0.10 |
| Lovastatin      | Risperidone        | 0.10 |
| Lovastatin      | Sulfasalazine      | 0.10 |
| Mephenytoin     | Risperidone        | 0.10 |
| Mephenytoin     | Sulfasalazine      | 0.10 |
| Mimosine        | Paclitaxel         | 0.10 |
| Mimosine        | Triflusal          | 0.10 |
| Minocycline     | Primidone          | 0.10 |
| Nitrendipine    | Proguanil          | 0.10 |
| Pentoxifylline  | Probenecid         | 0.10 |
| Pimozide        | Topiramate         | 0.10 |
| Prednisone      | Topiramate         | 0.10 |
| Progesterone    | Tolbutamide        | 0.10 |
| Propranolol     | Valproic Acid      | 0.10 |
| Raloxifene      | Topiramate         | 0.10 |
| Sulfasalazine   | Tolbutamide        | 0.10 |
| Thalidomide     | Tolbutamide        | 0.10 |
| Amrinone        | Danazol            | 0.10 |
| Carbamazepine   | Paclitaxel         | 0.10 |
| Celastrol       | Minocycline        | 0.10 |
| Citalopram      | Pimozide           | 0.10 |
| Clomipramine    | Doxycycline        | 0.10 |
| Folic Acid      | Verapamil          | 0.10 |
| Lidocaine       | Verapamil          | 0.10 |
| Metformin       | Topiramate         | 0.10 |
| Amitriptyline   | Diethylcarbamazine | 0.10 |
| Amitriptyline   | Lansoprazole       | 0.10 |
| Amitriptyline   | Ondansetron        | 0.10 |
| Amitriptyline   | Risperidone        | 0.10 |
| Amitriptyline   | Thalidomide        | 0.10 |
| Amoxicillin     | Dexamethasone      | 0.10 |
| Amoxicillin     | Finasteride        | 0.10 |
| Amoxicillin     | Quinidine          | 0.10 |
| Amrinone        | Cimetidine         | 0.10 |
| Amrinone        | Valproic Acid      | 0.10 |
| Buspirone       | Cisapride          | 0.10 |
| Buspirone       | Haloperidol        | 0.10 |
| Buspirone       | Progesterone       | 0.10 |
| Carbamazepine   | Clozapine          | 0.10 |
| Carbamazepine   | Sirolimus          | 0.10 |
| Chloramphenicol | Doxycycline        | 0.10 |
| Chloramphenicol | Topiramate         | 0.10 |
| Cisapride       | Risperidone        | 0.10 |

|                   |                   |      |
|-------------------|-------------------|------|
| Citalopram        | Meclofenamic Acid | 0.10 |
| Dexamethasone     | Imipramine        | 0.10 |
| Dexamethasone     | Propranolol       | 0.10 |
| Dextromethorphan  | Domperidone       | 0.10 |
| Diclofenac        | Triflusal         | 0.10 |
| Diltiazem         | Miconazole        | 0.10 |
| Domperidone       | Minocycline       | 0.10 |
| Domperidone       | Propranolol       | 0.10 |
| Doxorubicin       | Ergocalciferol    | 0.10 |
| Doxorubicin       | Testosterone      | 0.10 |
| Doxorubicin       | Trazodone         | 0.10 |
| Finasteride       | Ketoconazole      | 0.10 |
| Finasteride       | Probenecid        | 0.10 |
| Finasteride       | Saquinavir        | 0.10 |
| Fluvoxamine       | Lidocaine         | 0.10 |
| Haloperidol       | Lansoprazole      | 0.10 |
| Imipramine        | Methotrexate      | 0.10 |
| Leflunomide       | Methotrexate      | 0.10 |
| Leflunomide       | Quinidine         | 0.10 |
| Meclofenamic Acid | Theophylline      | 0.10 |
| Methotrexate      | Minocycline       | 0.10 |
| Pentoxifylline    | Proguanil         | 0.10 |
| Progesterone      | Risperidone       | 0.10 |
| Propranolol       | Quinidine         | 0.10 |
| Sirolimus         | Topiramate        | 0.10 |
| Amrinone          | Celastrol         | 0.09 |
| Celastrol         | Etidronic Acid    | 0.09 |
| Chloramphenicol   | Fluoxetine        | 0.09 |
| Citalopram        | Metformin         | 0.09 |
| Citalopram        | Paclitaxel        | 0.09 |
| Clomipramine      | Lidocaine         | 0.09 |
| Clozapine         | Felodipine        | 0.09 |
| Doxycycline       | Terfenadine       | 0.09 |
| Erythromycin      | Terfenadine       | 0.09 |
| Finasteride       | Nitrendipine      | 0.09 |
| Folic Acid        | Paclitaxel        | 0.09 |
| Leflunomide       | Verapamil         | 0.09 |
| Lidocaine         | Paclitaxel        | 0.09 |
| Terfenadine       | Topiramate        | 0.09 |
| Amitriptyline     | Mimosine          | 0.09 |
| Amoxicillin       | Estradiol         | 0.09 |
| Amoxicillin       | Prednisone        | 0.09 |
| Amrinone          | Finasteride       | 0.09 |



|                    |                    |      |
|--------------------|--------------------|------|
| Amrinone           | Pimozide           | 0.09 |
| Buspirone          | Diethylcarbamazine | 0.09 |
| Buspirone          | Risperidone        | 0.09 |
| Buspirone          | Thalidomide        | 0.09 |
| Carbamazepine      | Lovastatin         | 0.09 |
| Celecoxib          | Ketoconazole       | 0.09 |
| Celecoxib          | Probenecid         | 0.09 |
| Chloramphenicol    | Citalopram         | 0.09 |
| Chloramphenicol    | Lidocaine          | 0.09 |
| Chloramphenicol    | Theophylline       | 0.09 |
| Chloroquine        | Mimosine           | 0.09 |
| Clenbuterol        | Triflusal          | 0.09 |
| Clomipramine       | Probenecid         | 0.09 |
| Dapsone            | Diclofenac         | 0.09 |
| Dapsone            | Irinotecan         | 0.09 |
| Dapsone            | Mimosine           | 0.09 |
| Dapsone            | Tamoxifen          | 0.09 |
| Dextromethorphan   | Meclofenamic Acid  | 0.09 |
| Dextromethorphan   | Prednisone         | 0.09 |
| Diclofenac         | Haloperidol        | 0.09 |
| Diclofenac         | Hydrocortisone     | 0.09 |
| Diethylcarbamazine | Risperidone        | 0.09 |
| Diethylcarbamazine | Sulfasalazine      | 0.09 |
| Diltiazem          | Finasteride        | 0.09 |
| Diltiazem          | Methotrexate       | 0.09 |
| Domperidone        | Testosterone       | 0.09 |
| Domperidone        | Trazodone          | 0.09 |
| Doxorubicin        | Simvastatin        | 0.09 |
| Erythromycin       | Imatinib           | 0.09 |
| Estradiol          | Leflunomide        | 0.09 |
| Estradiol          | Probenecid         | 0.09 |
| Estradiol          | Propranolol        | 0.09 |
| Etidronic Acid     | Methotrexate       | 0.09 |
| Felodipine         | Imatinib           | 0.09 |
| Felodipine         | Triflusal          | 0.09 |
| Fluvoxamine        | Ketoconazole       | 0.09 |
| Folic Acid         | Terfenadine        | 0.09 |
| Haloperidol        | Irinotecan         | 0.09 |
| Hydrocortisone     | Tamoxifen          | 0.09 |
| Irinotecan         | Mephenytoin        | 0.09 |
| Irinotecan         | Tolbutamide        | 0.09 |
| Leflunomide        | Prednisone         | 0.09 |
| Lidocaine          | Sirolimus          | 0.09 |

|                   |                    |      |
|-------------------|--------------------|------|
| Meclofenamic Acid | Propranolol        | 0.09 |
| Meclofenamic Acid | Saquinavir         | 0.09 |
| Mephenytoin       | Tamoxifen          | 0.09 |
| Nifedipine        | Triflusal          | 0.09 |
| Pentoxifylline    | Simvastatin        | 0.09 |
| Primidone         | Simvastatin        | 0.09 |
| Proguanil         | Quinidine          | 0.09 |
| Clomipramine      | Ergocalciferol     | 0.09 |
| Clomipramine      | Proguanil          | 0.09 |
| Pentoxifylline    | Verapamil          | 0.09 |
| Simvastatin       | Verapamil          | 0.09 |
| Amitriptyline     | Carbamazepine      | 0.09 |
| Carisoprodol      | Prednisone         | 0.09 |
| Carisoprodol      | Raloxifene         | 0.09 |
| Celecoxib         | Testosterone       | 0.09 |
| Chloroquine       | Felodipine         | 0.09 |
| Cimetidine        | Dexamethasone      | 0.09 |
| Citalopram        | Imatinib           | 0.09 |
| Dapsone           | Felodipine         | 0.09 |
| Dexamethasone     | Valproic Acid      | 0.09 |
| Diclofenac        | Diethylcarbamazine | 0.09 |
| Diclofenac        | Risperidone        | 0.09 |
| Diltiazem         | Raloxifene         | 0.09 |
| Doxorubicin       | Quinidine          | 0.09 |
| Estradiol         | Testosterone       | 0.09 |
| Etidronic Acid    | Meclofenamic Acid  | 0.09 |
| Felodipine        | Mephenytoin        | 0.09 |
| Finasteride       | Valproic Acid      | 0.09 |
| Fluoxetine        | Tolbutamide        | 0.09 |
| Fluvoxamine       | Testosterone       | 0.09 |
| Haloperidol       | Topiramate         | 0.09 |
| Hydrocortisone    | Nifedipine         | 0.09 |
| Irinotecan        | Risperidone        | 0.09 |
| Irinotecan        | Sulfasalazine      | 0.09 |
| Irinotecan        | Thalidomide        | 0.09 |
| Lansoprazole      | Tamoxifen          | 0.09 |
| Mephenytoin       | Nifedipine         | 0.09 |
| Methotrexate      | Pentoxifylline     | 0.09 |
| Methotrexate      | Simvastatin        | 0.09 |
| Miconazole        | Quinidine          | 0.09 |
| Prednisone        | Trazodone          | 0.09 |
| Probenecid        | Sirolimus          | 0.09 |
| Progesterone      | Topiramate         | 0.09 |

|                    |                 |      |
|--------------------|-----------------|------|
| Propranolol        | Sirolimus       | 0.09 |
| Sulfasalazine      | Tamoxifen       | 0.09 |
| Celastrol          | Estradiol       | 0.09 |
| Cimetidine         | Clomipramine    | 0.09 |
| Diclofenac         | Tamoxifen       | 0.09 |
| Ergocalciferol     | Terfenadine     | 0.09 |
| Finasteride        | Verapamil       | 0.09 |
| Metformin          | Miconazole      | 0.09 |
| Amrinone           | Chloramphenicol | 0.08 |
| Amrinone           | Clozapine       | 0.08 |
| Astemizole         | Chloroquine     | 0.08 |
| Astemizole         | Dapsone         | 0.08 |
| Astemizole         | Hydrocortisone  | 0.08 |
| Astemizole         | Tolbutamide     | 0.08 |
| Buspirone          | Felodipine      | 0.08 |
| Carbamazepine      | Chloroquine     | 0.08 |
| Carbamazepine      | Hydrocortisone  | 0.08 |
| Carbamazepine      | Mephenytoin     | 0.08 |
| Carisoprodol       | Sirolimus       | 0.08 |
| Celecoxib          | Doxorubicin     | 0.08 |
| Chloramphenicol    | Trazodone       | 0.08 |
| Chloroquine        | Topiramate      | 0.08 |
| Cimetidine         | Fluvoxamine     | 0.08 |
| Citalopram         | Triflusal       | 0.08 |
| Clozapine          | Ergocalciferol  | 0.08 |
| Clozapine          | Testosterone    | 0.08 |
| Dapsone            | Doxycycline     | 0.08 |
| Dexamethasone      | Finasteride     | 0.08 |
| Dextromethorphan   | Imatinib        | 0.08 |
| Diclofenac         | Mimosine        | 0.08 |
| Diethylcarbamazine | Mimosine        | 0.08 |
| Diethylcarbamazine | Nifedipine      | 0.08 |
| Diltiazem          | Sirolimus       | 0.08 |
| Doxycycline        | Mephenytoin     | 0.08 |
| Ergocalciferol     | Sirolimus       | 0.08 |
| Felodipine         | Risperidone     | 0.08 |
| Felodipine         | Sulfasalazine   | 0.08 |
| Felodipine         | Thalidomide     | 0.08 |
| Fluoxetine         | Lansoprazole    | 0.08 |
| Fluvoxamine        | Primidone       | 0.08 |
| Folic Acid         | Progesterone    | 0.08 |
| Imatinib           | Mesalazine      | 0.08 |
| Lansoprazole       | Mimosine        | 0.08 |

|                  |                    |      |
|------------------|--------------------|------|
| Lidocaine        | Progesterone       | 0.08 |
| Lidocaine        | Triflusal          | 0.08 |
| Mimosine         | Thalidomide        | 0.08 |
| Nifedipine       | Ondansetron        | 0.08 |
| Sirolimus        | Trazodone          | 0.08 |
| Tolbutamide      | Topiramate         | 0.08 |
| Haloperidol      | Mesalazine         | 0.08 |
| Metformin        | Raloxifene         | 0.08 |
| Amoxicillin      | Haloperidol        | 0.08 |
| Amoxicillin      | Progesterone       | 0.08 |
| Amrinone         | Lovastatin         | 0.08 |
| Astemizole       | Diethylcarbamazine | 0.08 |
| Astemizole       | Ondansetron        | 0.08 |
| Astemizole       | Risperidone        | 0.08 |
| Carbamazepine    | Diclofenac         | 0.08 |
| Carbamazepine    | Irinotecan         | 0.08 |
| Carisoprodol     | Lovastatin         | 0.08 |
| Chloramphenicol  | Miconazole         | 0.08 |
| Chloramphenicol  | Valproic Acid      | 0.08 |
| Chloroquine      | Nitrendipine       | 0.08 |
| Cimetidine       | Sirolimus          | 0.08 |
| Cisapride        | Propranolol        | 0.08 |
| Clenbuterol      | Irinotecan         | 0.08 |
| Clenbuterol      | Tamoxifen          | 0.08 |
| Clozapine        | Doxorubicin        | 0.08 |
| Clozapine        | Pentoxifylline     | 0.08 |
| Danazol          | Triflusal          | 0.08 |
| Dapsone          | Nitrendipine       | 0.08 |
| Dexamethasone    | Fluvoxamine        | 0.08 |
| Dextromethorphan | Progesterone       | 0.08 |
| Doxycycline      | Irinotecan         | 0.08 |
| Ergocalciferol   | Lovastatin         | 0.08 |
| Erythromycin     | Irinotecan         | 0.08 |
| Estradiol        | Methotrexate       | 0.08 |
| Etidronic Acid   | Imatinib           | 0.08 |
| Fluoxetine       | Mimosine           | 0.08 |
| Haloperidol      | Probenecid         | 0.08 |
| Hydrocortisone   | Nitrendipine       | 0.08 |
| Imatinib         | Trazodone          | 0.08 |
| Mimosine         | Nifedipine         | 0.08 |
| Nitrendipine     | Tolbutamide        | 0.08 |
| Amitriptyline    | Amrinone           | 0.08 |
| Amoxicillin      | Triflusal          | 0.08 |

|                    |                    |      |
|--------------------|--------------------|------|
| Carbamazepine      | Ondansetron        | 0.08 |
| Carbamazepine      | Risperidone        | 0.08 |
| Carbamazepine      | Thalidomide        | 0.08 |
| Chloroquine        | Danazol            | 0.08 |
| Chloroquine        | Lidocaine          | 0.08 |
| Chloroquine        | Theophylline       | 0.08 |
| Cimetidine         | Imatinib           | 0.08 |
| Cisapride          | Trazodone          | 0.08 |
| Citalopram         | Diclofenac         | 0.08 |
| Clenbuterol        | Diethylcarbamazine | 0.08 |
| Clenbuterol        | Ondansetron        | 0.08 |
| Clenbuterol        | Risperidone        | 0.08 |
| Clozapine          | Methotrexate       | 0.08 |
| Danazol            | Mephenytoin        | 0.08 |
| Dapsone            | Lidocaine          | 0.08 |
| Dapsone            | Mesalazine         | 0.08 |
| Dapsone            | Theophylline       | 0.08 |
| Dextromethorphan   | Triflusal          | 0.08 |
| Diclofenac         | Lidocaine          | 0.08 |
| Diethylcarbamazine | Topiramate         | 0.08 |
| Domperidone        | Sirolimus          | 0.08 |
| Doxorubicin        | Imatinib           | 0.08 |
| Doxycycline        | Felodipine         | 0.08 |
| Doxycycline        | Fluoxetine         | 0.08 |
| Doxycycline        | Lansoprazole       | 0.08 |
| Doxycycline        | Ondansetron        | 0.08 |
| Doxycycline        | Risperidone        | 0.08 |
| Ergocalciferol     | Haloperidol        | 0.08 |
| Erythromycin       | Lansoprazole       | 0.08 |
| Erythromycin       | Ondansetron        | 0.08 |
| Folic Acid         | Irinotecan         | 0.08 |
| Folic Acid         | Mephenytoin        | 0.08 |
| Hydrocortisone     | Lidocaine          | 0.08 |
| Hydrocortisone     | Mesalazine         | 0.08 |
| Imipramine         | Triflusal          | 0.08 |
| Irinotecan         | Lidocaine          | 0.08 |
| Ketoconazole       | Triflusal          | 0.08 |
| Lansoprazole       | Nitrendipine       | 0.08 |
| Leflunomide        | Triflusal          | 0.08 |
| Mephenytoin        | Theophylline       | 0.08 |
| Nitrendipine       | Risperidone        | 0.08 |
| Nitrendipine       | Thalidomide        | 0.08 |
| Ondansetron        | Topiramate         | 0.08 |

|                    |                    |      |
|--------------------|--------------------|------|
| Propranolol        | Triflusal          | 0.08 |
| Saquinavir         | Triflusal          | 0.08 |
| Thalidomide        | Topiramate         | 0.08 |
| Amoxicillin        | Diclofenac         | 0.07 |
| Amoxicillin        | Irinotecan         | 0.07 |
| Astemizole         | Erythromycin       | 0.07 |
| Astemizole         | Topiramate         | 0.07 |
| Buspirone          | Danazol            | 0.07 |
| Celastrol          | Dapsone            | 0.07 |
| Celastrol          | Mephenytoin        | 0.07 |
| Cimetidine         | Cisapride          | 0.07 |
| Danazol            | Diethylcarbamazine | 0.07 |
| Danazol            | Ondansetron        | 0.07 |
| Danazol            | Risperidone        | 0.07 |
| Danazol            | Sulfasalazine      | 0.07 |
| Dexamethasone      | Imatinib           | 0.07 |
| Diclofenac         | Minocycline        | 0.07 |
| Diclofenac         | Propranolol        | 0.07 |
| Diethylcarbamazine | Mesalazine         | 0.07 |
| Fluoxetine         | Folic Acid         | 0.07 |
| Haloperidol        | Primidone          | 0.07 |
| Lansoprazole       | Mesalazine         | 0.07 |
| Lidocaine          | Nifedipine         | 0.07 |
| Lovastatin         | Quinidine          | 0.07 |
| Mesalazine         | Risperidone        | 0.07 |
| Mesalazine         | Thalidomide        | 0.07 |
| Pimozide           | Triflusal          | 0.07 |
| Triflusal          | Verapamil          | 0.07 |
| Amoxicillin        | Dapsone            | 0.07 |
| Amoxicillin        | Tolbutamide        | 0.07 |
| Amrinone           | Triflusal          | 0.07 |
| Astemizole         | Lidocaine          | 0.07 |
| Buspirone          | Citalopram         | 0.07 |
| Buspirone          | Folic Acid         | 0.07 |
| Celastrol          | Sulfasalazine      | 0.07 |
| Chloroquine        | Leflunomide        | 0.07 |
| Chloroquine        | Probenecid         | 0.07 |
| Citalopram         | Diethylcarbamazine | 0.07 |
| Citalopram         | Lansoprazole       | 0.07 |
| Citalopram         | Sulfasalazine      | 0.07 |
| Clomipramine       | Triflusal          | 0.07 |
| Dapsone            | Dextromethorphan   | 0.07 |
| Dapsone            | Imipramine         | 0.07 |

|                    |                   |      |
|--------------------|-------------------|------|
| Dapsone            | Ketoconazole      | 0.07 |
| Dapsone            | Pimozide          | 0.07 |
| Dapsone            | Verapamil         | 0.07 |
| Dextromethorphan   | Mephenytoin       | 0.07 |
| Diethylcarbamazine | Folic Acid        | 0.07 |
| Diethylcarbamazine | Lidocaine         | 0.07 |
| Diethylcarbamazine | Theophylline      | 0.07 |
| Diltiazem          | Triflusal         | 0.07 |
| Doxycycline        | Nitrendipine      | 0.07 |
| Ergocalciferol     | Tamoxifen         | 0.07 |
| Felodipine         | Propranolol       | 0.07 |
| Felodipine         | Saquinavir        | 0.07 |
| Finasteride        | Progesterone      | 0.07 |
| Fluoxetine         | Leflunomide       | 0.07 |
| Folic Acid         | Risperidone       | 0.07 |
| Folic Acid         | Sulfasalazine     | 0.07 |
| Folic Acid         | Thalidomide       | 0.07 |
| Hydrocortisone     | Imipramine        | 0.07 |
| Hydrocortisone     | Ketoconazole      | 0.07 |
| Hydrocortisone     | Probenecid        | 0.07 |
| Irinotecan         | Proguanil         | 0.07 |
| Ketoconazole       | Tolbutamide       | 0.07 |
| Lidocaine          | Sulfasalazine     | 0.07 |
| Mimosine           | Topiramate        | 0.07 |
| Nifedipine         | Propranolol       | 0.07 |
| Paclitaxel         | Triflusal         | 0.07 |
| Probenecid         | Tolbutamide       | 0.07 |
| Proguanil          | Tamoxifen         | 0.07 |
| Proguanil          | Triflusal         | 0.07 |
| Saquinavir         | Tolbutamide       | 0.07 |
| Trazodone          | Triflusal         | 0.07 |
| Amitriptyline      | Meclofenamic Acid | 0.07 |
| Carbamazepine      | Mesalazine        | 0.07 |
| Carisoprodol       | Fluoxetine        | 0.07 |
| Celastrol          | Mimosine          | 0.07 |
| Chloramphenicol    | Imatinib          | 0.07 |
| Citalopram         | Nitrendipine      | 0.07 |
| Clomipramine       | Dapsone           | 0.07 |
| Clomipramine       | Tolbutamide       | 0.07 |
| Danazol            | Doxycycline       | 0.07 |
| Dapsone            | Paclitaxel        | 0.07 |
| Erythromycin       | Mesalazine        | 0.07 |
| Irinotecan         | Pentoxifylline    | 0.07 |

|                    |                    |      |
|--------------------|--------------------|------|
| Nifedipine         | Proguanil          | 0.07 |
| Nifedipine         | Testosterone       | 0.07 |
| Nitrendipine       | Theophylline       | 0.07 |
| Ondansetron        | Verapamil          | 0.07 |
| Pimozide           | Sulfasalazine      | 0.07 |
| Primidone          | Tamoxifen          | 0.07 |
| Risperidone        | Verapamil          | 0.07 |
| Amoxicillin        | Buspirone          | 0.07 |
| Amoxicillin        | Sulfasalazine      | 0.07 |
| Amrinone           | Chloroquine        | 0.07 |
| Amrinone           | Dapsone            | 0.07 |
| Amrinone           | Hydrocortisone     | 0.07 |
| Amrinone           | Mephenytoin        | 0.07 |
| Amrinone           | Tolbutamide        | 0.07 |
| Buspirone          | Leflunomide        | 0.07 |
| Buspirone          | Minocycline        | 0.07 |
| Buspirone          | Probenecid         | 0.07 |
| Carbamazepine      | Clenbuterol        | 0.07 |
| Carbamazepine      | Topiramate         | 0.07 |
| Celastrol          | Erythromycin       | 0.07 |
| Citalopram         | Danazol            | 0.07 |
| Citalopram         | Mesalazine         | 0.07 |
| Clenbuterol        | Doxycycline        | 0.07 |
| Clomipramine       | Diethylcarbamazine | 0.07 |
| Clomipramine       | Thalidomide        | 0.07 |
| Dapsone            | Ergocalciferol     | 0.07 |
| Dextromethorphan   | Ondansetron        | 0.07 |
| Dextromethorphan   | Risperidone        | 0.07 |
| Dextromethorphan   | Sulfasalazine      | 0.07 |
| Dextromethorphan   | Thalidomide        | 0.07 |
| Diclofenac         | Finasteride        | 0.07 |
| Diethylcarbamazine | Imipramine         | 0.07 |
| Ergocalciferol     | Mephenytoin        | 0.07 |
| Ergocalciferol     | Tolbutamide        | 0.07 |
| Erythromycin       | Topiramate         | 0.07 |
| Etidronic Acid     | Mephenytoin        | 0.07 |
| Finasteride        | Irinotecan         | 0.07 |
| Hydrocortisone     | Proguanil          | 0.07 |
| Imipramine         | Risperidone        | 0.07 |
| Imipramine         | Sulfasalazine      | 0.07 |
| Imipramine         | Thalidomide        | 0.07 |
| Lansoprazole       | Leflunomide        | 0.07 |
| Lansoprazole       | Paclitaxel         | 0.07 |



|                   |                    |      |
|-------------------|--------------------|------|
| Lansoprazole      | Saquinavir         | 0.07 |
| Leflunomide       | Sulfasalazine      | 0.07 |
| Leflunomide       | Thalidomide        | 0.07 |
| Lidocaine         | Mesalazine         | 0.07 |
| Lidocaine         | Mimosine           | 0.07 |
| Mephenytoin       | Proguanil          | 0.07 |
| Mephenytoin       | Terfenadine        | 0.07 |
| Mephenytoin       | Testosterone       | 0.07 |
| Mephenytoin       | Trazodone          | 0.07 |
| Metformin         | Ondansetron        | 0.07 |
| Metformin         | Risperidone        | 0.07 |
| Minocycline       | Risperidone        | 0.07 |
| Minocycline       | Sulfasalazine      | 0.07 |
| Ondansetron       | Paclitaxel         | 0.07 |
| Ondansetron       | Probenecid         | 0.07 |
| Ondansetron       | Propranolol        | 0.07 |
| Probenecid        | Thalidomide        | 0.07 |
| Propranolol       | Thalidomide        | 0.07 |
| Risperidone       | Saquinavir         | 0.07 |
| Terfenadine       | Tolbutamide        | 0.07 |
| Testosterone      | Tolbutamide        | 0.07 |
| Amrinone          | Nitrendipine       | 0.06 |
| Astemizole        | Pentoxifylline     | 0.06 |
| Astemizole        | Valproic Acid      | 0.06 |
| Celastrol         | Citalopram         | 0.06 |
| Celastrol         | Folic Acid         | 0.06 |
| Celastrol         | Lidocaine          | 0.06 |
| Celastrol         | Theophylline       | 0.06 |
| Celecoxib         | Irinotecan         | 0.06 |
| Diclofenac        | Estradiol          | 0.06 |
| Lansoprazole      | Terfenadine        | 0.06 |
| Meclofenamic Acid | Tamoxifen          | 0.06 |
| Risperidone       | Terfenadine        | 0.06 |
| Amoxicillin       | Celastrol          | 0.06 |
| Amrinone          | Diethylcarbamazine | 0.06 |
| Amrinone          | Ondansetron        | 0.06 |
| Amrinone          | Sulfasalazine      | 0.06 |
| Buspirone         | Diltiazem          | 0.06 |
| Buspirone         | Testosterone       | 0.06 |
| Carbamazepine     | Folic Acid         | 0.06 |
| Carbamazepine     | Lidocaine          | 0.06 |
| Carbamazepine     | Metformin          | 0.06 |
| Carisoprodol      | Diethylcarbamazine | 0.06 |

|                    |                |      |
|--------------------|----------------|------|
| Carisoprodol       | Lansoprazole   | 0.06 |
| Carisoprodol       | Risperidone    | 0.06 |
| Carisoprodol       | Thalidomide    | 0.06 |
| Celastrol          | Propranolol    | 0.06 |
| Celastrol          | Saquinavir     | 0.06 |
| Chloroquine        | Doxorubicin    | 0.06 |
| Chloroquine        | Primidone      | 0.06 |
| Chloroquine        | Simvastatin    | 0.06 |
| Chloroquine        | Valproic Acid  | 0.06 |
| Cimetidine         | Mephenytoin    | 0.06 |
| Citalopram         | Topiramate     | 0.06 |
| Clenbuterol        | Folic Acid     | 0.06 |
| Clomipramine       | Topiramate     | 0.06 |
| Dapsone            | Doxorubicin    | 0.06 |
| Dapsone            | Simvastatin    | 0.06 |
| Diethylcarbamazine | Diltiazem      | 0.06 |
| Diethylcarbamazine | Ergocalciferol | 0.06 |
| Diethylcarbamazine | Testosterone   | 0.06 |
| Diethylcarbamazine | Trazodone      | 0.06 |
| Diltiazem          | Risperidone    | 0.06 |
| Diltiazem          | Thalidomide    | 0.06 |
| Doxorubicin        | Hydrocortisone | 0.06 |
| Ergocalciferol     | Ondansetron    | 0.06 |
| Estradiol          | Felodipine     | 0.06 |
| Etidronic Acid     | Lansoprazole   | 0.06 |
| Felodipine         | Prednisone     | 0.06 |
| Fluvoxamine        | Nifedipine     | 0.06 |
| Folic Acid         | Pimozide       | 0.06 |
| Imipramine         | Mimosine       | 0.06 |
| Lansoprazole       | Proguanil      | 0.06 |
| Lidocaine          | Pimozide       | 0.06 |
| Meclofenamic Acid  | Nifedipine     | 0.06 |
| Mephenytoin        | Miconazole     | 0.06 |
| Mephenytoin        | Pentoxifylline | 0.06 |
| Mephenytoin        | Simvastatin    | 0.06 |
| Mephenytoin        | Valproic Acid  | 0.06 |
| Miconazole         | Nitrendipine   | 0.06 |
| Ondansetron        | Trazodone      | 0.06 |
| Primidone          | Tolbutamide    | 0.06 |
| Proguanil          | Sulfasalazine  | 0.06 |
| Proguanil          | Thalidomide    | 0.06 |
| Risperidone        | Trazodone      | 0.06 |
| Sulfasalazine      | Trazodone      | 0.06 |

|                |                   |      |
|----------------|-------------------|------|
| Testosterone   | Thalidomide       | 0.06 |
| Theophylline   | Verapamil         | 0.06 |
| Astemizole     | Meclofenamic Acid | 0.06 |
| Clomipramine   | Theophylline      | 0.06 |
| Folic Acid     | Metformin         | 0.06 |
| Imatinib       | Irinotecan        | 0.06 |
| Lidocaine      | Metformin         | 0.06 |
| Amoxicillin    | Carbamazepine     | 0.06 |
| Amoxicillin    | Clenbuterol       | 0.06 |
| Amoxicillin    | Topiramate        | 0.06 |
| Buspirone      | Doxorubicin       | 0.06 |
| Buspirone      | Pentoxifylline    | 0.06 |
| Buspirone      | Simvastatin       | 0.06 |
| Carbamazepine  | Dextromethorphan  | 0.06 |
| Carbamazepine  | Leflunomide       | 0.06 |
| Carbamazepine  | Propranolol       | 0.06 |
| Chloroquine    | Dexamethasone     | 0.06 |
| Chloroquine    | Methotrexate      | 0.06 |
| Cimetidine     | Lansoprazole      | 0.06 |
| Cimetidine     | Risperidone       | 0.06 |
| Citalopram     | Lidocaine         | 0.06 |
| Clenbuterol    | Leflunomide       | 0.06 |
| Clenbuterol    | Minocycline       | 0.06 |
| Dapsone        | Quinidine         | 0.06 |
| Dexamethasone  | Hydrocortisone    | 0.06 |
| Doxorubicin    | Sulfasalazine     | 0.06 |
| Doxorubicin    | Thalidomide       | 0.06 |
| Doxycycline    | Leflunomide       | 0.06 |
| Doxycycline    | Propranolol       | 0.06 |
| Erythromycin   | Leflunomide       | 0.06 |
| Erythromycin   | Minocycline       | 0.06 |
| Estradiol      | Triflusal         | 0.06 |
| Etidronic Acid | Mimosine          | 0.06 |
| Finasteride    | Mesalazine        | 0.06 |
| Fluvoxamine    | Nitrendipine      | 0.06 |
| Fluvoxamine    | Triflusal         | 0.06 |
| Hydrocortisone | Methotrexate      | 0.06 |
| Hydrocortisone | Quinidine         | 0.06 |
| Lansoprazole   | Valproic Acid     | 0.06 |
| Lidocaine      | Terfenadine       | 0.06 |
| Mephenytoin    | Methotrexate      | 0.06 |
| Mephenytoin    | Quinidine         | 0.06 |
| Metformin      | Minocycline       | 0.06 |

|                    |                    |      |
|--------------------|--------------------|------|
| Methotrexate       | Tolbutamide        | 0.06 |
| Mimosine           | Proguanil          | 0.06 |
| Mimosine           | Trazodone          | 0.06 |
| Ondansetron        | Simvastatin        | 0.06 |
| Prednisone         | Triflusal          | 0.06 |
| Quinidine          | Tolbutamide        | 0.06 |
| Terfenadine        | Theophylline       | 0.06 |
| Thalidomide        | Valproic Acid      | 0.06 |
| Clomipramine       | Etidronic Acid     | 0.06 |
| Danazol            | Estradiol          | 0.06 |
| Danazol            | Raloxifene         | 0.06 |
| Estradiol          | Mesalazine         | 0.06 |
| Amoxicillin        | Citalopram         | 0.06 |
| Amoxicillin        | Theophylline       | 0.06 |
| Buspirone          | Dexamethasone      | 0.06 |
| Buspirone          | Finasteride        | 0.06 |
| Carbamazepine      | Ergocalciferol     | 0.06 |
| Carbamazepine      | Proguanil          | 0.06 |
| Carbamazepine      | Trazodone          | 0.06 |
| Carisoprodol       | Clenbuterol        | 0.06 |
| Carisoprodol       | Doxycycline        | 0.06 |
| Carisoprodol       | Topiramate         | 0.06 |
| Celecoxib          | Tolbutamide        | 0.06 |
| Chloramphenicol    | Triflusal          | 0.06 |
| Chloroquine        | Meclofenamic Acid  | 0.06 |
| Chloroquine        | Prednisone         | 0.06 |
| Cimetidine         | Mimosine           | 0.06 |
| Citalopram         | Imipramine         | 0.06 |
| Citalopram         | Ketoconazole       | 0.06 |
| Citalopram         | Propranolol        | 0.06 |
| Clenbuterol        | Proguanil          | 0.06 |
| Clomipramine       | Primidone          | 0.06 |
| Clozapine          | Triflusal          | 0.06 |
| Dapsone            | Fluvoxamine        | 0.06 |
| Dapsone            | Prednisone         | 0.06 |
| Dexamethasone      | Diethylcarbamazine | 0.06 |
| Dexamethasone      | Lansoprazole       | 0.06 |
| Dexamethasone      | Thalidomide        | 0.06 |
| Dextromethorphan   | Folic Acid         | 0.06 |
| Dextromethorphan   | Lidocaine          | 0.06 |
| Diethylcarbamazine | Finasteride        | 0.06 |
| Diltiazem          | Erythromycin       | 0.06 |
| Domperidone        | Lansoprazole       | 0.06 |

|                 |                |      |
|-----------------|----------------|------|
| Domperidone     | Risperidone    | 0.06 |
| Domperidone     | Sulfasalazine  | 0.06 |
| Doxycycline     | Ergocalciferol | 0.06 |
| Doxycycline     | Testosterone   | 0.06 |
| Doxycycline     | Trazodone      | 0.06 |
| Erythromycin    | Trazodone      | 0.06 |
| Fluvoxamine     | Tolbutamide    | 0.06 |
| Folic Acid      | Imipramine     | 0.06 |
| Folic Acid      | Ketoconazole   | 0.06 |
| Folic Acid      | Probenecid     | 0.06 |
| Folic Acid      | Propranolol    | 0.06 |
| Folic Acid      | Saquinavir     | 0.06 |
| Hydrocortisone  | Prednisone     | 0.06 |
| Ketoconazole    | Theophylline   | 0.06 |
| Leflunomide     | Theophylline   | 0.06 |
| Mephenytoin     | Prednisone     | 0.06 |
| Mephenytoin     | Raloxifene     | 0.06 |
| Methotrexate    | Ondansetron    | 0.06 |
| Methotrexate    | Sulfasalazine  | 0.06 |
| Methotrexate    | Thalidomide    | 0.06 |
| Mimosine        | Primidone      | 0.06 |
| Mimosine        | Valproic Acid  | 0.06 |
| Probenecid      | Theophylline   | 0.06 |
| Propranolol     | Theophylline   | 0.06 |
| Quinidine       | Thalidomide    | 0.06 |
| Sirolimus       | Triflusal      | 0.06 |
| Topiramate      | Trazodone      | 0.06 |
| Amoxicillin     | Leflunomide    | 0.05 |
| Buspirone       | Fluvoxamine    | 0.05 |
| Buspirone       | Prednisone     | 0.05 |
| Buspirone       | Raloxifene     | 0.05 |
| Carbamazepine   | Pentoxifylline | 0.05 |
| Carbamazepine   | Valproic Acid  | 0.05 |
| Carisoprodol    | Citalopram     | 0.05 |
| Carisoprodol    | Lidocaine      | 0.05 |
| Celecoxib       | Ondansetron    | 0.05 |
| Celecoxib       | Risperidone    | 0.05 |
| Chloramphenicol | Tolbutamide    | 0.05 |
| Chloroquine     | Sirolimus      | 0.05 |
| Cimetidine      | Topiramate     | 0.05 |
| Clozapine       | Dapsone        | 0.05 |
| Clozapine       | Mephenytoin    | 0.05 |
| Dexamethasone   | Mimosine       | 0.05 |

|                    |               |      |
|--------------------|---------------|------|
| Diethylcarbamazine | Fluvoxamine   | 0.05 |
| Diltiazem          | Lidocaine     | 0.05 |
| Doxycycline        | Primidone     | 0.05 |
| Doxycycline        | Simvastatin   | 0.05 |
| Doxycycline        | Valproic Acid | 0.05 |
| Ergocalciferol     | Lidocaine     | 0.05 |
| Erythromycin       | Primidone     | 0.05 |
| Erythromycin       | Valproic Acid | 0.05 |
| Estradiol          | Metformin     | 0.05 |
| Estradiol          | Thalidomide   | 0.05 |
| Fluvoxamine        | Lansoprazole  | 0.05 |
| Fluvoxamine        | Sulfasalazine | 0.05 |
| Fluvoxamine        | Thalidomide   | 0.05 |
| Ketoconazole       | Minocycline   | 0.05 |
| Ketoconazole       | Probenecid    | 0.05 |
| Leflunomide        | Propranolol   | 0.05 |
| Leflunomide        | Saquinavir    | 0.05 |
| Lidocaine          | Proguanil     | 0.05 |
| Meclofenamic Acid  | Ondansetron   | 0.05 |
| Meclofenamic Acid  | Risperidone   | 0.05 |
| Meclofenamic Acid  | Thalidomide   | 0.05 |
| Metformin          | Prednisone    | 0.05 |
| Methotrexate       | Mimosine      | 0.05 |
| Miconazole         | Topiramate    | 0.05 |
| Minocycline        | Probenecid    | 0.05 |
| Minocycline        | Propranolol   | 0.05 |
| Minocycline        | Saquinavir    | 0.05 |
| Ondansetron        | Raloxifene    | 0.05 |
| Paclitaxel         | Prednisone    | 0.05 |
| Prednisone         | Thalidomide   | 0.05 |
| Proguanil          | Theophylline  | 0.05 |
| Raloxifene         | Risperidone   | 0.05 |
| Topiramate         | Valproic Acid | 0.05 |
| Amoxicillin        | Trazodone     | 0.05 |
| Amrinone           | Ketoconazole  | 0.05 |
| Amrinone           | Probenecid    | 0.05 |
| Buspirone          | Sirolimus     | 0.05 |
| Carbamazepine      | Quinidine     | 0.05 |
| Cimetidine         | Theophylline  | 0.05 |
| Citalopram         | Valproic Acid | 0.05 |
| Clenbuterol        | Finasteride   | 0.05 |
| Clozapine          | Lansoprazole  | 0.05 |
| Clozapine          | Sulfasalazine | 0.05 |

|                    |                   |      |
|--------------------|-------------------|------|
| Dexamethasone      | Topiramate        | 0.05 |
| Dextromethorphan   | Testosterone      | 0.05 |
| Diethylcarbamazine | Sirolimus         | 0.05 |
| Doxycycline        | Quinidine         | 0.05 |
| Ergocalciferol     | Minocycline       | 0.05 |
| Erythromycin       | Finasteride       | 0.05 |
| Erythromycin       | Methotrexate      | 0.05 |
| Etidronic Acid     | Leflunomide       | 0.05 |
| Etidronic Acid     | Propranolol       | 0.05 |
| Folic Acid         | Miconazole        | 0.05 |
| Folic Acid         | Simvastatin       | 0.05 |
| Folic Acid         | Valproic Acid     | 0.05 |
| Haloperidol        | Triflusal         | 0.05 |
| Hydrocortisone     | Lovastatin        | 0.05 |
| Imatinib           | Mephenytoin       | 0.05 |
| Imatinib           | Metformin         | 0.05 |
| Leflunomide        | Testosterone      | 0.05 |
| Leflunomide        | Trazodone         | 0.05 |
| Lidocaine          | Simvastatin       | 0.05 |
| Lidocaine          | Valproic Acid     | 0.05 |
| Mesalazine         | Tamoxifen         | 0.05 |
| Minocycline        | Proguanil         | 0.05 |
| Minocycline        | Trazodone         | 0.05 |
| Progesterone       | Triflusal         | 0.05 |
| Amoxicillin        | Miconazole        | 0.05 |
| Buspirone          | Imatinib          | 0.05 |
| Buspirone          | Lovastatin        | 0.05 |
| Carbamazepine      | Meclofenamic Acid | 0.05 |
| Carisoprodol       | Testosterone      | 0.05 |
| Carisoprodol       | Trazodone         | 0.05 |
| Chloroquine        | Cisapride         | 0.05 |
| Cimetidine         | Minocycline       | 0.05 |
| Cisapride          | Hydrocortisone    | 0.05 |
| Citalopram         | Domperidone       | 0.05 |
| Dapsone            | Haloperidol       | 0.05 |
| Dapsone            | Progesterone      | 0.05 |
| Dextromethorphan   | Pentoxifylline    | 0.05 |
| Dextromethorphan   | Primidone         | 0.05 |
| Doxorubicin        | Probenecid        | 0.05 |
| Doxorubicin        | Saquinavir        | 0.05 |
| Erythromycin       | Meclofenamic Acid | 0.05 |
| Erythromycin       | Raloxifene        | 0.05 |
| Etidronic Acid     | Testosterone      | 0.05 |

|                    |                    |      |
|--------------------|--------------------|------|
| Haloperidol        | Hydrocortisone     | 0.05 |
| Haloperidol        | Mephenytoin        | 0.05 |
| Imatinib           | Risperidone        | 0.05 |
| Imipramine         | Pentoxifylline     | 0.05 |
| Lovastatin         | Thalidomide        | 0.05 |
| Minocycline        | Simvastatin        | 0.05 |
| Minocycline        | Valproic Acid      | 0.05 |
| Pentoxifylline     | Propranolol        | 0.05 |
| Primidone          | Propranolol        | 0.05 |
| Primidone          | Saquinavir         | 0.05 |
| Proguanil          | Trazodone          | 0.05 |
| Propranolol        | Simvastatin        | 0.05 |
| Carbamazepine      | Chloramphenicol    | 0.05 |
| Carisoprodol       | Doxorubicin        | 0.05 |
| Cisapride          | Diethylcarbamazine | 0.05 |
| Clenbuterol        | Sirolimus          | 0.05 |
| Dextromethorphan   | Finasteride        | 0.05 |
| Diethylcarbamazine | Haloperidol        | 0.05 |
| Diethylcarbamazine | Progesterone       | 0.05 |
| Doxorubicin        | Proguanil          | 0.05 |
| Ergocalciferol     | Miconazole         | 0.05 |
| Erythromycin       | Sirolimus          | 0.05 |
| Etidronic Acid     | Miconazole         | 0.05 |
| Haloperidol        | Ondansetron        | 0.05 |
| Haloperidol        | Risperidone        | 0.05 |
| Methotrexate       | Probenecid         | 0.05 |
| Miconazole         | Proguanil          | 0.05 |
| Ondansetron        | Progesterone       | 0.05 |
| Probenecid         | Quinidine          | 0.05 |
| Progesterone       | Sulfasalazine      | 0.05 |
| Proguanil          | Simvastatin        | 0.05 |
| Quinidine          | Saquinavir         | 0.05 |
| Tamoxifen          | Triflusal          | 0.05 |
| Testosterone       | Valproic Acid      | 0.05 |
| Amoxicillin        | Celecoxib          | 0.04 |
| Amrinone           | Domperidone        | 0.04 |
| Carisoprodol       | Finasteride        | 0.04 |
| Carisoprodol       | Methotrexate       | 0.04 |
| Celecoxib          | Dextromethorphan   | 0.04 |
| Celecoxib          | Propranolol        | 0.04 |
| Celecoxib          | Saquinavir         | 0.04 |
| Chloroquine        | Irinotecan         | 0.04 |
| Cimetidine         | Doxorubicin        | 0.04 |



|                    |                   |      |
|--------------------|-------------------|------|
| Cimetidine         | Miconazole        | 0.04 |
| Cimetidine         | Pentoxifylline    | 0.04 |
| Clozapine          | Theophylline      | 0.04 |
| Dexamethasone      | Diltiazem         | 0.04 |
| Dexamethasone      | Proguanil         | 0.04 |
| Dextromethorphan   | Estradiol         | 0.04 |
| Diclofenac         | Mephenytoin       | 0.04 |
| Diclofenac         | Tolbutamide       | 0.04 |
| Diltiazem          | Domperidone       | 0.04 |
| Domperidone        | Ergocalciferol    | 0.04 |
| Doxorubicin        | Primidone         | 0.04 |
| Ergocalciferol     | Finasteride       | 0.04 |
| Ergocalciferol     | Methotrexate      | 0.04 |
| Finasteride        | Proguanil         | 0.04 |
| Fluoxetine         | Triflusal         | 0.04 |
| Hydrocortisone     | Irinotecan        | 0.04 |
| Imipramine         | Meclofenamic Acid | 0.04 |
| Miconazole         | Pentoxifylline    | 0.04 |
| Miconazole         | Valproic Acid     | 0.04 |
| Pentoxifylline     | Valproic Acid     | 0.04 |
| Prednisone         | Probenecid        | 0.04 |
| Probenecid         | Raloxifene        | 0.04 |
| Amitriptyline      | Topiramate        | 0.04 |
| Amrinone           | Fluvoxamine       | 0.04 |
| Astemizole         | Triflusal         | 0.04 |
| Buspirone          | Irinotecan        | 0.04 |
| Carisoprodol       | Fluvoxamine       | 0.04 |
| Celecoxib          | Trazodone         | 0.04 |
| Chloramphenicol    | Minocycline       | 0.04 |
| Cimetidine         | Finasteride       | 0.04 |
| Cimetidine         | Methotrexate      | 0.04 |
| Diclofenac         | Ondansetron       | 0.04 |
| Diethylcarbamazine | Irinotecan        | 0.04 |
| Diltiazem          | Prednisone        | 0.04 |
| Domperidone        | Doxorubicin       | 0.04 |
| Ergocalciferol     | Fluvoxamine       | 0.04 |
| Estradiol          | Trazodone         | 0.04 |
| Felodipine         | Tolbutamide       | 0.04 |
| Fluoxetine         | Mephenytoin       | 0.04 |
| Irinotecan         | Ondansetron       | 0.04 |
| Meclofenamic Acid  | Trazodone         | 0.04 |
| Methotrexate       | Primidone         | 0.04 |
| Raloxifene         | Testosterone      | 0.04 |

|                    |                    |      |
|--------------------|--------------------|------|
| Saquinavir         | Sirolimus          | 0.04 |
| Amitriptyline      | Lidocaine          | 0.04 |
| Amitriptyline      | Theophylline       | 0.04 |
| Diethylcarbamazine | Fluoxetine         | 0.04 |
| Doxorubicin        | Meclofenamic Acid  | 0.04 |
| Felodipine         | Lansoprazole       | 0.04 |
| Felodipine         | Ondansetron        | 0.04 |
| Fluoxetine         | Ondansetron        | 0.04 |
| Irinotecan         | Mimosine           | 0.04 |
| Meclofenamic Acid  | Miconazole         | 0.04 |
| Meclofenamic Acid  | Simvastatin        | 0.04 |
| Nifedipine         | Sulfasalazine      | 0.04 |
| Prednisone         | Valproic Acid      | 0.04 |
| Primidone          | Raloxifene         | 0.04 |
| Proguanil          | Sirolimus          | 0.04 |
| Astemizole         | Buspirone          | 0.04 |
| Astemizole         | Lansoprazole       | 0.04 |
| Carisoprodol       | Imatinib           | 0.04 |
| Celecoxib          | Dexamethasone      | 0.04 |
| Dexamethasone      | Meclofenamic Acid  | 0.04 |
| Diclofenac         | Doxycycline        | 0.04 |
| Ergocalciferol     | Imatinib           | 0.04 |
| Meclofenamic Acid  | Methotrexate       | 0.04 |
| Mephénytoin        | Nitrendipine       | 0.04 |
| Primidone          | Sirolimus          | 0.04 |
| Celastrol          | Triflusal          | 0.04 |
| Chloramphenicol    | Finasteride        | 0.04 |
| Chloroquine        | Mesalazine         | 0.04 |
| Clenbuterol        | Nifedipine         | 0.04 |
| Danazol            | Dapsone            | 0.04 |
| Danazol            | Tolbutamide        | 0.04 |
| Fluoxetine         | Topiramate         | 0.04 |
| Irinotecan         | Theophylline       | 0.04 |
| Chloramphenicol    | Raloxifene         | 0.04 |
| Felodipine         | Lidocaine          | 0.04 |
| Felodipine         | Theophylline       | 0.04 |
| Imipramine         | Irinotecan         | 0.04 |
| Irinotecan         | Saquinavir         | 0.04 |
| Mesalazine         | Ondansetron        | 0.04 |
| Pentoxifylline     | Progesterone       | 0.04 |
| Amoxicillin        | Nifedipine         | 0.03 |
| Astemizole         | Folic Acid         | 0.03 |
| Celastrol          | Diethylcarbamazine | 0.03 |

|                 |                |      |
|-----------------|----------------|------|
| Celastrol       | Lansoprazole   | 0.03 |
| Celastrol       | Risperidone    | 0.03 |
| Celastrol       | Thalidomide    | 0.03 |
| Chloroquine     | Pimozide       | 0.03 |
| Pimozide        | Tolbutamide    | 0.03 |
| Tolbutamide     | Verapamil      | 0.03 |
| Chloroquine     | Clomipramine   | 0.03 |
| Chloroquine     | Paclitaxel     | 0.03 |
| Doxycycline     | Mesalazine     | 0.03 |
| Felodipine      | Proguanil      | 0.03 |
| Hydrocortisone  | Paclitaxel     | 0.03 |
| Ondansetron     | Pimozide       | 0.03 |
| Paclitaxel      | Tolbutamide    | 0.03 |
| Pimozide        | Risperidone    | 0.03 |
| Pimozide        | Thalidomide    | 0.03 |
| Buspirone       | Clomipramine   | 0.03 |
| Celastrol       | Doxycycline    | 0.03 |
| Chloramphenicol | Cisapride      | 0.03 |
| Clomipramine    | Lansoprazole   | 0.03 |
| Clomipramine    | Risperidone    | 0.03 |
| Danazol         | Theophylline   | 0.03 |
| Lansoprazole    | Metformin      | 0.03 |
| Mimosine        | Pimozide       | 0.03 |
| Paclitaxel      | Thalidomide    | 0.03 |
| Astemizole      | Primidone      | 0.03 |
| Buspirone       | Terfenadine    | 0.03 |
| Diclofenac      | Fluvoxamine    | 0.03 |
| Diclofenac      | Prednisone     | 0.03 |
| Ondansetron     | Terfenadine    | 0.03 |
| Sulfasalazine   | Terfenadine    | 0.03 |
| Danazol         | Etidronic Acid | 0.03 |
| Doxycycline     | Metformin      | 0.03 |
| Diclofenac      | Imatinib       | 0.03 |
| Paclitaxel      | Theophylline   | 0.03 |
| Celastrol       | Pentoxifylline | 0.03 |
| Nitrendipine    | Raloxifene     | 0.03 |
| Mesalazine      | Prednisone     | 0.03 |
| Pentoxifylline  | Pimozide       | 0.03 |
| Amitriptyline   | Doxycycline    | 0.00 |
| Amitriptyline   | Mephenytoin    | 0.00 |
| Amitriptyline   | Probenecid     | 0.00 |
| Amoxicillin     | Ergocalciferol | 0.00 |
| Amoxicillin     | Lansoprazole   | 0.00 |

|               |                    |      |
|---------------|--------------------|------|
| Amoxicillin   | Mephenytoin        | 0.00 |
| Amoxicillin   | Simvastatin        | 0.00 |
| Amrinone      | Leflunomide        | 0.00 |
| Astemizole    | Ergocalciferol     | 0.00 |
| Astemizole    | Sulfasalazine      | 0.00 |
| Buspirone     | Carbamazepine      | 0.00 |
| Buspirone     | Clenbuterol        | 0.00 |
| Buspirone     | Dextromethorphan   | 0.00 |
| Buspirone     | Doxycycline        | 0.00 |
| Buspirone     | Fluoxetine         | 0.00 |
| Buspirone     | Lansoprazole       | 0.00 |
| Buspirone     | Lidocaine          | 0.00 |
| Buspirone     | Methotrexate       | 0.00 |
| Buspirone     | Miconazole         | 0.00 |
| Buspirone     | Mimosine           | 0.00 |
| Buspirone     | Ondansetron        | 0.00 |
| Buspirone     | Propranolol        | 0.00 |
| Buspirone     | Theophylline       | 0.00 |
| Buspirone     | Tolbutamide        | 0.00 |
| Buspirone     | Trazodone          | 0.00 |
| Carbamazepine | Carisoprodol       | 0.00 |
| Carbamazepine | Dapsone            | 0.00 |
| Carbamazepine | Diethylcarbamazine | 0.00 |
| Carbamazepine | Diltiazem          | 0.00 |
| Carbamazepine | Ketoconazole       | 0.00 |
| Carbamazepine | Lansoprazole       | 0.00 |
| Carbamazepine | Nitrendipine       | 0.00 |
| Carbamazepine | Primidone          | 0.00 |
| Carbamazepine | Sulfasalazine      | 0.00 |
| Carbamazepine | Triflusal          | 0.00 |
| Carisoprodol  | Mephenytoin        | 0.00 |
| Carisoprodol  | Miconazole         | 0.00 |
| Carisoprodol  | Mimosine           | 0.00 |
| Carisoprodol  | Ondansetron        | 0.00 |
| Carisoprodol  | Propranolol        | 0.00 |
| Carisoprodol  | Theophylline       | 0.00 |
| Carisoprodol  | Tolbutamide        | 0.00 |
| Celastrol     | Chloroquine        | 0.00 |
| Celastrol     | Hydrocortisone     | 0.00 |
| Celastrol     | Ondansetron        | 0.00 |
| Celastrol     | Tolbutamide        | 0.00 |
| Celecoxib     | Thalidomide        | 0.00 |
| Chloroquine   | Clenbuterol        | 0.00 |

|              |                  |      |
|--------------|------------------|------|
| Chloroquine  | Dextromethorphan | 0.00 |
| Chloroquine  | Diltiazem        | 0.00 |
| Chloroquine  | Ergocalciferol   | 0.00 |
| Chloroquine  | Fluoxetine       | 0.00 |
| Chloroquine  | Mephenytoin      | 0.00 |
| Chloroquine  | Miconazole       | 0.00 |
| Chloroquine  | Minocycline      | 0.00 |
| Chloroquine  | Progesterone     | 0.00 |
| Chloroquine  | Propranolol      | 0.00 |
| Chloroquine  | Quinidine        | 0.00 |
| Chloroquine  | Sulfasalazine    | 0.00 |
| Chloroquine  | Testosterone     | 0.00 |
| Chloroquine  | Trazodone        | 0.00 |
| Chloroquine  | Triflusal        | 0.00 |
| Cimetidine   | Clenbuterol      | 0.00 |
| Cimetidine   | Raloxifene       | 0.00 |
| Cimetidine   | Testosterone     | 0.00 |
| Cisapride    | Erythromycin     | 0.00 |
| Cisapride    | Thalidomide      | 0.00 |
| Citalopram   | Clenbuterol      | 0.00 |
| Citalopram   | Primidone        | 0.00 |
| Citalopram   | Proguanil        | 0.00 |
| Citalopram   | Testosterone     | 0.00 |
| Clenbuterol  | Dapsone          | 0.00 |
| Clenbuterol  | Dextromethorphan | 0.00 |
| Clenbuterol  | Doxorubicin      | 0.00 |
| Clenbuterol  | Etidronic Acid   | 0.00 |
| Clenbuterol  | Hydrocortisone   | 0.00 |
| Clenbuterol  | Mephenytoin      | 0.00 |
| Clenbuterol  | Probenecid       | 0.00 |
| Clenbuterol  | Thalidomide      | 0.00 |
| Clenbuterol  | Tolbutamide      | 0.00 |
| Clenbuterol  | Topiramate       | 0.00 |
| Clomipramine | Sulfasalazine    | 0.00 |
| Clozapine    | Risperidone      | 0.00 |
| Clozapine    | Topiramate       | 0.00 |
| Dapsone      | Diltiazem        | 0.00 |
| Dapsone      | Fluoxetine       | 0.00 |
| Dapsone      | Methotrexate     | 0.00 |
| Dapsone      | Miconazole       | 0.00 |
| Dapsone      | Minocycline      | 0.00 |
| Dapsone      | Propranolol      | 0.00 |
| Dapsone      | Sirolimus        | 0.00 |

|                    |                |      |
|--------------------|----------------|------|
| Dapsone            | Sulfasalazine  | 0.00 |
| Dapsone            | Testosterone   | 0.00 |
| Dapsone            | Trazodone      | 0.00 |
| Dapsone            | Triflusal      | 0.00 |
| Dapsone            | Valproic Acid  | 0.00 |
| Dexamethasone      | Triflusal      | 0.00 |
| Dextromethorphan   | Doxycycline    | 0.00 |
| Dextromethorphan   | Erythromycin   | 0.00 |
| Dextromethorphan   | Hydrocortisone | 0.00 |
| Dextromethorphan   | Lansoprazole   | 0.00 |
| Dextromethorphan   | Mimosine       | 0.00 |
| Dextromethorphan   | Minocycline    | 0.00 |
| Dextromethorphan   | Theophylline   | 0.00 |
| Dextromethorphan   | Tolbutamide    | 0.00 |
| Dextromethorphan   | Topiramate     | 0.00 |
| Diclofenac         | Raloxifene     | 0.00 |
| Diclofenac         | Theophylline   | 0.00 |
| Diethylcarbamazine | Doxorubicin    | 0.00 |
| Diethylcarbamazine | Doxycycline    | 0.00 |
| Diethylcarbamazine | Felodipine     | 0.00 |
| Diethylcarbamazine | Methotrexate   | 0.00 |
| Diethylcarbamazine | Miconazole     | 0.00 |
| Diethylcarbamazine | Minocycline    | 0.00 |
| Diethylcarbamazine | Raloxifene     | 0.00 |
| Diltiazem          | Doxorubicin    | 0.00 |
| Diltiazem          | Doxycycline    | 0.00 |
| Diltiazem          | Estradiol      | 0.00 |
| Diltiazem          | Folic Acid     | 0.00 |
| Diltiazem          | Hydrocortisone | 0.00 |
| Diltiazem          | Mephentyoin    | 0.00 |
| Diltiazem          | Minocycline    | 0.00 |
| Diltiazem          | Ondansetron    | 0.00 |
| Diltiazem          | Theophylline   | 0.00 |
| Diltiazem          | Tolbutamide    | 0.00 |
| Domperidone        | Mimosine       | 0.00 |
| Domperidone        | Ondansetron    | 0.00 |
| Domperidone        | Quinidine      | 0.00 |
| Domperidone        | Tolbutamide    | 0.00 |
| Domperidone        | Triflusal      | 0.00 |
| Doxorubicin        | Lansoprazole   | 0.00 |
| Doxorubicin        | Triflusal      | 0.00 |
| Doxycycline        | Imipramine     | 0.00 |
| Doxycycline        | Ketoconazole   | 0.00 |

|                |                |      |
|----------------|----------------|------|
| Doxycycline    | Paclitaxel     | 0.00 |
| Doxycycline    | Pimozide       | 0.00 |
| Doxycycline    | Saquinavir     | 0.00 |
| Doxycycline    | Sulfasalazine  | 0.00 |
| Doxycycline    | Triflusal      | 0.00 |
| Ergocalciferol | Hydrocortisone | 0.00 |
| Ergocalciferol | Mimosine       | 0.00 |
| Ergocalciferol | Propranolol    | 0.00 |
| Ergocalciferol | Raloxifene     | 0.00 |
| Ergocalciferol | Saquinavir     | 0.00 |
| Ergocalciferol | Thalidomide    | 0.00 |
| Erythromycin   | Fluvoxamine    | 0.00 |
| Erythromycin   | Mephenytoin    | 0.00 |
| Erythromycin   | Probenecid     | 0.00 |
| Erythromycin   | Proguanil      | 0.00 |
| Erythromycin   | Quinidine      | 0.00 |
| Erythromycin   | Sulfasalazine  | 0.00 |
| Erythromycin   | Triflusal      | 0.00 |
| Estradiol      | Irinotecan     | 0.00 |
| Finasteride    | Metformin      | 0.00 |
| Finasteride    | Propranolol    | 0.00 |
| Finasteride    | Trazodone      | 0.00 |
| Finasteride    | Triflusal      | 0.00 |
| Fluoxetine     | Hydrocortisone | 0.00 |
| Fluoxetine     | Thalidomide    | 0.00 |
| Fluvoxamine    | Risperidone    | 0.00 |
| Folic Acid     | Trazodone      | 0.00 |
| Haloperidol    | Sulfasalazine  | 0.00 |
| Haloperidol    | Thalidomide    | 0.00 |
| Hydrocortisone | Miconazole     | 0.00 |
| Hydrocortisone | Pimozide       | 0.00 |
| Hydrocortisone | Primidone      | 0.00 |
| Hydrocortisone | Progesterone   | 0.00 |
| Hydrocortisone | Propranolol    | 0.00 |
| Hydrocortisone | Simvastatin    | 0.00 |
| Hydrocortisone | Sulfasalazine  | 0.00 |
| Hydrocortisone | Testosterone   | 0.00 |
| Hydrocortisone | Theophylline   | 0.00 |
| Hydrocortisone | Topiramate     | 0.00 |
| Hydrocortisone | Trazodone      | 0.00 |
| Hydrocortisone | Valproic Acid  | 0.00 |
| Imatinib       | Triflusal      | 0.00 |
| Imipramine     | Lansoprazole   | 0.00 |

|                   |                   |      |
|-------------------|-------------------|------|
| Imipramine        | Lidocaine         | 0.00 |
| Imipramine        | Mephenytoin       | 0.00 |
| Imipramine        | Ondansetron       | 0.00 |
| Imipramine        | Probenecid        | 0.00 |
| Imipramine        | Theophylline      | 0.00 |
| Imipramine        | Tolbutamide       | 0.00 |
| Imipramine        | Topiramate        | 0.00 |
| Irinotecan        | Lansoprazole      | 0.00 |
| Irinotecan        | Prednisone        | 0.00 |
| Irinotecan        | Triflusal         | 0.00 |
| Ketoconazole      | Lansoprazole      | 0.00 |
| Ketoconazole      | Meclofenamic Acid | 0.00 |
| Ketoconazole      | Mephenytoin       | 0.00 |
| Ketoconazole      | Mimosine          | 0.00 |
| Lansoprazole      | Mephenytoin       | 0.00 |
| Lansoprazole      | Methotrexate      | 0.00 |
| Lansoprazole      | Miconazole        | 0.00 |
| Lansoprazole      | Minocycline       | 0.00 |
| Lansoprazole      | Pimozide          | 0.00 |
| Lansoprazole      | Probenecid        | 0.00 |
| Lansoprazole      | Progesterone      | 0.00 |
| Lansoprazole      | Propranolol       | 0.00 |
| Lansoprazole      | Sirolimus         | 0.00 |
| Lansoprazole      | Trazodone         | 0.00 |
| Lansoprazole      | Verapamil         | 0.00 |
| Leflunomide       | Lidocaine         | 0.00 |
| Leflunomide       | Risperidone       | 0.00 |
| Lidocaine         | Mephenytoin       | 0.00 |
| Lidocaine         | Probenecid        | 0.00 |
| Lovastatin        | Triflusal         | 0.00 |
| Meclofenamic Acid | Tolbutamide       | 0.00 |
| Mephenytoin       | Propranolol       | 0.00 |
| Mephenytoin       | Saquinavir        | 0.00 |
| Mephenytoin       | Thalidomide       | 0.00 |
| Mesalazine        | Raloxifene        | 0.00 |
| Mesalazine        | Theophylline      | 0.00 |
| Mesalazine        | Tolbutamide       | 0.00 |
| Metformin         | Theophylline      | 0.00 |
| Metformin         | Tolbutamide       | 0.00 |
| Methotrexate      | Saquinavir        | 0.00 |
| Methotrexate      | Triflusal         | 0.00 |
| Miconazole        | Ondansetron       | 0.00 |
| Miconazole        | Primidone         | 0.00 |



|                |               |      |
|----------------|---------------|------|
| Miconazole     | Probenecid    | 0.00 |
| Miconazole     | Sulfasalazine | 0.00 |
| Miconazole     | Thalidomide   | 0.00 |
| Miconazole     | Triflusal     | 0.00 |
| Mimosine       | Risperidone   | 0.00 |
| Mimosine       | Simvastatin   | 0.00 |
| Mimosine       | Sulfasalazine | 0.00 |
| Minocycline    | Thalidomide   | 0.00 |
| Nifedipine     | Topiramate    | 0.00 |
| Ondansetron    | Proguanil     | 0.00 |
| Ondansetron    | Valproic Acid | 0.00 |
| Pentoxifylline | Trazodone     | 0.00 |
| Pimozide       | Theophylline  | 0.00 |
| Primidone      | Thalidomide   | 0.00 |
| Primidone      | Trazodone     | 0.00 |
| Probenecid     | Risperidone   | 0.00 |
| Probenecid     | Testosterone  | 0.00 |
| Probenecid     | Triflusal     | 0.00 |
| Progesterone   | Thalidomide   | 0.00 |
| Proguanil      | Risperidone   | 0.00 |
| Proguanil      | Testosterone  | 0.00 |
| Proguanil      | Tolbutamide   | 0.00 |
| Propranolol    | Risperidone   | 0.00 |
| Propranolol    | Sulfasalazine | 0.00 |
| Propranolol    | Tolbutamide   | 0.00 |
| Propranolol    | Topiramate    | 0.00 |
| Raloxifene     | Sulfasalazine | 0.00 |
| Raloxifene     | Triflusal     | 0.00 |
| Risperidone    | Triflusal     | 0.00 |
| Risperidone    | Valproic Acid | 0.00 |
| Saquinavir     | Sulfasalazine | 0.00 |
| Saquinavir     | Theophylline  | 0.00 |
| Saquinavir     | Topiramate    | 0.00 |
| Simvastatin    | Thalidomide   | 0.00 |
| Simvastatin    | Topiramate    | 0.00 |
| Simvastatin    | Triflusal     | 0.00 |
| Sirolimus      | Thalidomide   | 0.00 |
| Sulfasalazine  | Thalidomide   | 0.00 |
| Sulfasalazine  | Verapamil     | 0.00 |
| Terfenadine    | Triflusal     | 0.00 |
| Testosterone   | Triflusal     | 0.00 |
| Thalidomide    | Theophylline  | 0.00 |
| Theophylline   | Trazodone     | 0.00 |

|              |               |      |
|--------------|---------------|------|
| Theophylline | Triflusal     | 0.00 |
| Theophylline | Valproic Acid | 0.00 |
| Tolbutamide  | Trazodone     | 0.00 |
| Tolbutamide  | Triflusal     | 0.00 |
| Tolbutamide  | Valproic Acid | 0.00 |
| Topiramate   | Triflusal     | 0.00 |

[a] Li, B.; Xiong, M.; Zhang, H.Y. Elucidating polypharmacological mechanisms of polyphenols by gene module profile analysis. *Int. J. Mol. Sci.* 2014, 15, 11245–11254.
