# Supplementary material
Source: publisher figshare collection journal article supplement (https://tandf.figshare.com/articles/dataset/_/3464246)
Supplement: Supplementary file 2 [file 1]

**Table S2.** The primary indication, targets and co-occurrence number of multi-target agents.

| Agent           | Primary indication <sup>[a]</sup>                                                                                                                                                                                                                                                                                                                                                                                                                                                                                                                                                                                                                                                                                           | Host target <sup>[b]</sup> | MTB target <sup>[c]</sup> | Co-occurrence number <sup>[d]</sup> |
|-----------------|-----------------------------------------------------------------------------------------------------------------------------------------------------------------------------------------------------------------------------------------------------------------------------------------------------------------------------------------------------------------------------------------------------------------------------------------------------------------------------------------------------------------------------------------------------------------------------------------------------------------------------------------------------------------------------------------------------------------------------|----------------------------|---------------------------|-------------------------------------|
| Abacavir        | For the treatment of HIV-1 infection, in combination with other antiretroviral agents.                                                                                                                                                                                                                                                                                                                                                                                                                                                                                                                                                                                                                                      | HLA-B; TNF; LST1           |                           | 21                                  |
| Adalimumab      | For treatment of rheumatoid arthritis, psoriatic arthritis, ankylosing spondylitis, and Crohn's disease.                                                                                                                                                                                                                                                                                                                                                                                                                                                                                                                                                                                                                    | LTA; TNF                   |                           | 275                                 |
| Alfentanil      | For the management of postoperative pain and the maintenance of general anesthesia.                                                                                                                                                                                                                                                                                                                                                                                                                                                                                                                                                                                                                                         | CYP3A4; CYP3A5             |                           | 0                                   |
| Alpha-D-Mannose | Unkown                                                                                                                                                                                                                                                                                                                                                                                                                                                                                                                                                                                                                                                                                                                      | IL6R; MBL2; IL12B; CD209   |                           | 0                                   |
| Alprazolam      | For the management of anxiety disorder or the short-term relief of symptoms of anxiety and for the treatment of panic disorder, with or without agoraphobia.                                                                                                                                                                                                                                                                                                                                                                                                                                                                                                                                                                | CYP3A4; CYP3A5             | Rv3455c                   | 3                                   |
| Amlodipine      | For the treatment of hypertension and chronic stable angina.                                                                                                                                                                                                                                                                                                                                                                                                                                                                                                                                                                                                                                                                | CYP3A4; CYP3A5             |                           | 1                                   |
| Aripiprazole    | For the treatment of schizophrenia and related psychotic disorders.                                                                                                                                                                                                                                                                                                                                                                                                                                                                                                                                                                                                                                                         | CYP3A4; CYP3A5             |                           | 0                                   |
| Astemizole      | Astemizole was indicated for use in the relieving allergy symptoms, particularly rhinitis and conjunctivitis. It has been withdrawn from the market however due to concerns of arrhythmias.                                                                                                                                                                                                                                                                                                                                                                                                                                                                                                                                 | CYP3A4; CYP3A5             |                           | 0                                   |
| Atorvastatin    | May be used as primary prevention in individuals with multiple risk factors for coronary heart disease (CHD) and as secondary prevention in individuals with CHD to reduce the risk of myocardial infarction (MI), stroke, angina, and revascularization procedures. May be used to reduce the risk of cardiovascular events in patients with acute coronary syndrome (ACS). May be used in the treatment of primary hypercholesterolemia and mixed dyslipidemia, homozygous familial hypercholesterolemia, primary dysbetalipoproteinemia, and/or hypertriglyceridemia as an adjunct to dietary therapy to decrease serum total and low-density lipoprotein cholesterol (LDL-C), apolipoprotein B (apoB), and triglyceride | CYP3A4; CYP3A5             |                           | 6                                   |

|                  |                                                                                                                                                                                                                                                                                                                                            |                                                          |                                |     |
|------------------|--------------------------------------------------------------------------------------------------------------------------------------------------------------------------------------------------------------------------------------------------------------------------------------------------------------------------------------------|----------------------------------------------------------|--------------------------------|-----|
|                  | concentrations, while increasing high-density lipoprotein cholesterol (HDL-C) levels.                                                                                                                                                                                                                                                      |                                                          |                                |     |
| Bisphosphonates  | Osteoporosis                                                                                                                                                                                                                                                                                                                               | VDR; IL1B                                                |                                | 57  |
| Bortezomib       | For treatment of multiple myeloma in patients who have not been successfully treated with at least two previous therapies.                                                                                                                                                                                                                 | PSMB8;<br>PSMB9                                          | Rv0350;<br>Rv2109c;<br>Rv2110c | 6   |
| Buspirone        | For the management of anxiety disorders or the short-term relief of the symptoms of anxiety, and also as an augmentation of SSRI-treatment against depression.                                                                                                                                                                             | CYP3A4;<br>CYP3A5                                        |                                | 0   |
| Caffeine         | For management of fatigue, orthostatic hypotension, and for the short term treatment of apnea of prematurity in infants.                                                                                                                                                                                                                   | CYP3A4;<br>CYP3A5                                        |                                | 17  |
| Carbamazepine    | For the treatment of epilepsy and pain associated with true trigeminal neuralgia.                                                                                                                                                                                                                                                          | HLA-A; HLA-B;<br>CYP3A4;<br>CYP3A5; LTA;<br>TNF; CYP2C19 |                                | 25  |
| Carfilzomib      | Carfilzomib is indicated for the treatment of patients with multiple myeloma who have received at least two prior therapies including bortezomib and an immunomodulatory agent and have demonstrated disease progression on or within 60 days of completion of the last therapy. Approval is based on response rate.                       | PSMB8;<br>PSMB9                                          |                                | 0   |
| Celastrol        | Rheumatoid disease                                                                                                                                                                                                                                                                                                                         | TNF; IL1B                                                |                                | 1   |
| Cerivastatin     | Used as an adjunct to diet for the reduction of elevated total and LDL cholesterol levels in patients with primary hypercholesterolemia and mixed dyslipidemia (Fredrickson Types IIa and IIb) when the response to dietary restriction of saturated fat and cholesterol and other non-pharmacological measures alone has been inadequate. | CYP3A4;<br>CYP3A5                                        |                                | 1   |
| Chloroquine      | For the suppressive treatment and for acute attacks of malaria due to P. vivax, P. malariae, P. ovale, and susceptible strains of P. falciparum, Second-line agent in treatment of Rheumatoid Arthritis                                                                                                                                    | TLR9; TNF                                                |                                | 114 |
| Chlorpheniramine | For the treatment of rhinitis, urticaria, allergy, common cold, asthma and hay fever.                                                                                                                                                                                                                                                      | CYP3A4;<br>CYP3A5                                        |                                | 2   |
| Cilostazol       | For the reduction of symptoms of intermittent claudication (pain in the legs that occurs with walking and disappears with rest).                                                                                                                                                                                                           | CYP3A4;<br>CYP3A5                                        |                                | 2   |
| Cisapride        | For the symptomatic treatment of adult patients                                                                                                                                                                                                                                                                                            | CYP3A4;                                                  |                                | 0   |

|                |                                                                                                                                                                                                                                                                                                                                                                                                                                                                                                                                                                                                                                                                                                                                                                                                                                                                                                                                                                                                                                                                                                                                                                                                                                     |                    |                   |     |
|----------------|-------------------------------------------------------------------------------------------------------------------------------------------------------------------------------------------------------------------------------------------------------------------------------------------------------------------------------------------------------------------------------------------------------------------------------------------------------------------------------------------------------------------------------------------------------------------------------------------------------------------------------------------------------------------------------------------------------------------------------------------------------------------------------------------------------------------------------------------------------------------------------------------------------------------------------------------------------------------------------------------------------------------------------------------------------------------------------------------------------------------------------------------------------------------------------------------------------------------------------------|--------------------|-------------------|-----|
|                | with nocturnal heartburn due to gastroesophageal reflux disease.                                                                                                                                                                                                                                                                                                                                                                                                                                                                                                                                                                                                                                                                                                                                                                                                                                                                                                                                                                                                                                                                                                                                                                    | CYP3A5             |                   |     |
| Citalopram     | For the treatment of depression. Unlabeled indications include: treatment of mild dementia-associated agitation in nonpsychotic patients, smoking cessation, ethanol abuse, obsessive-compulsive disorder (OCD) in children, and diabetic neuropathy.                                                                                                                                                                                                                                                                                                                                                                                                                                                                                                                                                                                                                                                                                                                                                                                                                                                                                                                                                                               | CYP3A4;<br>CYP2C19 |                   | 0   |
| Clarithromycin | An alternative medication for the treatment of acute otitis media caused by <i>H. influenzae</i> , <i>M. catarrhalis</i> , or <i>S. pneumoniae</i> in patients with a history of type I penicillin hypersensitivity. Also for the treatment of pharyngitis and tonsillitis caused by susceptible <i>Streptococcus pyogenes</i> , as well as respiratory tract infections including acute maxillary sinusitis, acute bacterial exacerbations of chronic bronchitis, mild to moderate community-acquired pneumonia, Legionnaires' disease, and pertussis. Other indications include treatment of uncomplicated skin or skin structure infections, helicobacter pylori infection, duodenal ulcer disease, bartonella infections, early Lyme disease, and encephalitis caused by <i>Toxoplasma gondii</i> (in HIV infected patients in conjunction with pyrimethamine). Clarithromycin may also decrease the incidence of cryptosporidiosis, prevent the occurrence of $\alpha$ -hemolytic (viridans group) streptococcal endocarditis, as well as serve as a primary prevention for <i>Mycobacterium avium</i> complex (MAC) bacteremia or disseminated infections (in adults, adolescents, and children with advanced HIV infection). | CYP3A4;<br>CYP3A5  | Rv0667;<br>Rv0440 | 410 |
| Clodronate     | For the management of hypercalcemia of malignancy and as an adjunct in the management of osteolysis resulting from bone metastases of malignant tumors.                                                                                                                                                                                                                                                                                                                                                                                                                                                                                                                                                                                                                                                                                                                                                                                                                                                                                                                                                                                                                                                                             | VDR; IL1B          |                   | 2   |
| Cocaine        | For the introduction of local (topical) anesthesia of accessible mucous membranes of the oral, laryngeal and nasal cavities.                                                                                                                                                                                                                                                                                                                                                                                                                                                                                                                                                                                                                                                                                                                                                                                                                                                                                                                                                                                                                                                                                                        | CYP3A4;<br>CYP3A5  |                   | 84  |
| Codeine        | For treatment and management of pain (systemic). It is also used as an antidiarrheal and as a cough suppressant.                                                                                                                                                                                                                                                                                                                                                                                                                                                                                                                                                                                                                                                                                                                                                                                                                                                                                                                                                                                                                                                                                                                    | CYP3A4;<br>CYP3A5  |                   | 15  |

|                  |                                                                                                                                                                                                                                                                                                                                                                                                                                                                                                                                                                                                                                                                                                                                                                                                                                                                                                                                                                                                                                                   |                         |                 |     |
|------------------|---------------------------------------------------------------------------------------------------------------------------------------------------------------------------------------------------------------------------------------------------------------------------------------------------------------------------------------------------------------------------------------------------------------------------------------------------------------------------------------------------------------------------------------------------------------------------------------------------------------------------------------------------------------------------------------------------------------------------------------------------------------------------------------------------------------------------------------------------------------------------------------------------------------------------------------------------------------------------------------------------------------------------------------------------|-------------------------|-----------------|-----|
| Cpg 52364        | Systemic Lupus Erythematosus                                                                                                                                                                                                                                                                                                                                                                                                                                                                                                                                                                                                                                                                                                                                                                                                                                                                                                                                                                                                                      | TLR9; TLR8              |                 | 0   |
| Crx-191          | Psoriasis and Psoriatic Disorders                                                                                                                                                                                                                                                                                                                                                                                                                                                                                                                                                                                                                                                                                                                                                                                                                                                                                                                                                                                                                 | IFNG; TNF               |                 | 0   |
| Cyclophosphamide | Cyclophosphamide is indicated for the treatment of malignant lymphomas, multiple myeloma, leukemias, mycosis fungoides (advanced disease), neuroblastoma (disseminated disease), adenocarcinoma of the ovary, retinoblastoma, and carcinoma of the breast. It is also indicated for the treatment of biopsy-proven minimal change nephrotic syndrome in pediatric patients.                                                                                                                                                                                                                                                                                                                                                                                                                                                                                                                                                                                                                                                                       | CYP3A4; CYP2C19; IL8    | Rv2391; Rv3607c | 215 |
| Dapsone          | For the treatment and management of leprosy and dermatitis herpetiformis.                                                                                                                                                                                                                                                                                                                                                                                                                                                                                                                                                                                                                                                                                                                                                                                                                                                                                                                                                                         | CYP3A4; CYP3A5          | Rv3608c         | 138 |
| Dexamethasone    | <p>Injection: for the treatment of endocrine disorders, rheumatic D=disorders, collagen diseases, dermatologic diseases, allergic statesc, ophthalmic diseases, gastrointestinal diseases, respiratory diseases, hematologic disorders, neoplastic diseases, edematous states, cerebral edema.</p> <p>Ophthalmic ointment and solution: for the treatment of steroid responsive inflammatory conditions of the palpebral and bulbar conjunctiva, cornea, and anterior segment of the globe.</p> <p>Ophthalmic solution only: for the treatment of steroid responsive inflammatory conditions of the external auditory meatus</p> <p>Topic cream: for relief of the inflammatory and pruritic manifestations of corticosteroid-responsive dermatoses</p> <p>Oral aerosol: for the treatment of bronchial asthma and related corticosteroid responsive bronchospastic states intractable to adequate trial of conventional therapy</p> <p>Intranasal aerosol: for the treatment of allergic ot inflammatory nasal conditions, and nasal polyps.</p> | VDR; NOS2               |                 | 228 |
| Dextromethorphan | For treatment and relief of dry cough.                                                                                                                                                                                                                                                                                                                                                                                                                                                                                                                                                                                                                                                                                                                                                                                                                                                                                                                                                                                                            | CYP3A4; CYP3A5          |                 | 3   |
| Diazepam         | Used in the treatment of severe anxiety disorders, as a hypnotic in the short-term management of insomnia, as a sedative and premedicant, as an anticonvulsant, and in the                                                                                                                                                                                                                                                                                                                                                                                                                                                                                                                                                                                                                                                                                                                                                                                                                                                                        | CYP3A4; CYP3A5; CYP2C19 |                 | 24  |

|             |                                                                                                                                                                                                                                                                                                                                                                                                                                                                                                                                                                                                                                                                            |                             |        |    |
|-------------|----------------------------------------------------------------------------------------------------------------------------------------------------------------------------------------------------------------------------------------------------------------------------------------------------------------------------------------------------------------------------------------------------------------------------------------------------------------------------------------------------------------------------------------------------------------------------------------------------------------------------------------------------------------------------|-----------------------------|--------|----|
|             | management of alcohol withdrawal syndrome.                                                                                                                                                                                                                                                                                                                                                                                                                                                                                                                                                                                                                                 |                             |        |    |
| Diltiazem   | For the treatment of Hypertension                                                                                                                                                                                                                                                                                                                                                                                                                                                                                                                                                                                                                                          | CYP3A4;<br>CYP3A5           |        | 5  |
| Docetaxel   | For the treatment of patients with locally advanced or metastatic breast cancer after failure of prior chemotherapy. Also used as a single agent in the treatment of patients with locally advanced or metastatic non-small cell lung cancer after failure of prior platinum-based chemotherapy. It is also used in combination with prednisone, in the treatment of patients with androgen independent (hormone refractory) metastatic prostate cancer. Furthermore, docetaxel has uses in the treatment of gastric adenocarcinoma and head and neck cancer.                                                                                                              | CYP3A4;<br>CYP3A5           |        | 9  |
| Domperidone | For management of dyspepsia, heartburn, epigastric pain, nausea, and vomiting.                                                                                                                                                                                                                                                                                                                                                                                                                                                                                                                                                                                             | CYP3A4;<br>CYP3A5           |        | 1  |
| Doxorubicin | Doxorubicin is used to produce regression in disseminated neoplastic conditions like acute lymphoblastic leukemia, acute myeloblastic leukemia, Wilms' tumor, neuroblastoma, soft tissue and bone sarcomas, breast carcinoma, ovarian carcinoma, transitional cell bladder carcinoma, thyroid carcinoma, gastric carcinoma, Hodgkin's disease, malignant lymphoma and bronchogenic carcinoma in which the small cell histologic type is the most responsive compared to other cell types. Doxorubicin is also indicated for use as a component of adjuvant therapy in women with evidence of axillary lymph node involvement following resection of primary breast cancer. | CYP3A4;<br>NOS2;<br>CYP2C19 | Rv0005 | 57 |
| Eplerenone  | For improvement of survival of stable patients with left ventricular systolic dysfunction (ejection fraction <40%) and clinical evidence of congestive heart failure after an acute myocardial infarction.                                                                                                                                                                                                                                                                                                                                                                                                                                                                 | CYP3A4;<br>CYP3A5           |        | 0  |
| Erlotinib   | For the treatment of patients with locally advanced or metastatic non-small cell lung cancer after failure of at least one prior chemotherapy regimen. Also for use, in combination with gemcitabine, as the first-line treatment of patients with locally advanced,                                                                                                                                                                                                                                                                                                                                                                                                       | CYP3A4;<br>CYP3A5           |        | 12 |

|                |                                                                                                                                                                                                                                                                                                                                                                                                                                                                                                                                                                                                                                                                                                                                                                                                                                                                                                                                                        |                       |         |     |
|----------------|--------------------------------------------------------------------------------------------------------------------------------------------------------------------------------------------------------------------------------------------------------------------------------------------------------------------------------------------------------------------------------------------------------------------------------------------------------------------------------------------------------------------------------------------------------------------------------------------------------------------------------------------------------------------------------------------------------------------------------------------------------------------------------------------------------------------------------------------------------------------------------------------------------------------------------------------------------|-----------------------|---------|-----|
|                | unresectable or metastatic pancreatic cancer.                                                                                                                                                                                                                                                                                                                                                                                                                                                                                                                                                                                                                                                                                                                                                                                                                                                                                                          |                       |         |     |
| Estradiol      | For the treatment of urogenital symptoms associated with post-menopausal atrophy of the vagina (such as dryness, burning, pruritus and dyspareunia) and/or the lower urinary tract (urinary urgency and dysuria).                                                                                                                                                                                                                                                                                                                                                                                                                                                                                                                                                                                                                                                                                                                                      | CYP3A4;<br>CYP3A5     | Rv1017c | 45  |
| Etanercept     | For treatment of severe active rheumatoid arthritis in adults, severe juvenile idiopathic arthritis, ankylosing spondylitis, and severe plaque psoriasis.                                                                                                                                                                                                                                                                                                                                                                                                                                                                                                                                                                                                                                                                                                                                                                                              | LTA; TNF;<br>TNFRSF1B |         | 308 |
| Etidronic Acid | For the treatment of symptomatic Paget's disease of bone and in the prevention and treatment of heterotopic ossification following total hip replacement or due to spinal cord injury.                                                                                                                                                                                                                                                                                                                                                                                                                                                                                                                                                                                                                                                                                                                                                                 | VDR; IL1B             |         | 0   |
| Everolimus     | Everolimus is indicated for the treatment of postmenopausal women with advanced hormone receptor-positive, HER2-negative breast cancer (advanced HR+ BC) in combination with exemestane, after failure of treatment with letrozole or anastrozole. Indicated for the treatment of adult patients with progressive neuroendocrine tumors of pancreatic origin (PNET) with unresectable, locally advanced or metastatic disease. Indicated for the treatment of adult patients with advanced renal cell carcinoma (RCC) after failure of treatment with sunitinib or sorafenib. Indicated for the treatment of adult patients with renal angiomyolipoma and tuberous sclerosis complex (TSC), not requiring immediate surgery. Indicated in pediatric and adult patients with tuberous sclerosis complex (TSC) for the treatment of subependymal giant cell astrocytoma (SEGA) that requires therapeutic intervention but cannot be curatively resected. | AKT1; MTOR            |         | 5   |
| Felodipine     | For the treatment of mild to moderate essential hypertension.                                                                                                                                                                                                                                                                                                                                                                                                                                                                                                                                                                                                                                                                                                                                                                                                                                                                                          | CYP3A4;<br>CYP3A5     |         | 0   |
| Fentanyl       | For the treatment of cancer patients with severe pain that breaks through their regular narcotic therapy.                                                                                                                                                                                                                                                                                                                                                                                                                                                                                                                                                                                                                                                                                                                                                                                                                                              | CYP3A4;<br>CYP3A5     |         | 13  |
| Finasteride    | For the treatment of symptomatic benign prostatic hyperplasia (BPH) in men with an                                                                                                                                                                                                                                                                                                                                                                                                                                                                                                                                                                                                                                                                                                                                                                                                                                                                     | CYP3A4;<br>CYP3A5     |         | 3   |

|                |                                                                                                                                                                                                                                                                                                                                                                                                                                             |                        |        |     |
|----------------|---------------------------------------------------------------------------------------------------------------------------------------------------------------------------------------------------------------------------------------------------------------------------------------------------------------------------------------------------------------------------------------------------------------------------------------------|------------------------|--------|-----|
|                | enlarged prostate to: Improve symptoms, reduce the risk of acute urinary retention, reduce the risk of the need for surgery including transurethral resection of the prostate. Also used for the stimulation of regrowth of hair in men with mild to moderate androgenetic alopecia (male pattern alopecia, hereditary alopecia, common male baldness).                                                                                     |                        |        |     |
| Fluvoxamine    | For management of depression and for Obsessive Compulsive Disorder (OCD). Has also been used in the management of bulimia nervosa.                                                                                                                                                                                                                                                                                                          | CYP3A4;<br>CYP2C19     |        | 1   |
| Glucosamine    | Glucosamine is usually used in the treatment of osteoarthritis, although its efficacy is still in question.                                                                                                                                                                                                                                                                                                                                 | IFNG; TNF;<br>IL1B     |        | 57  |
| Haloperidol    | For the management of psychotic disorders (eg. schizophrenia) and delirium, as well as to control tics and vocal utterances of Tourette's syndrome (Gilles de la Tourette's syndrome). Also used for the treatment of severe behavioural problems in children with disruptive behaviour disorder or ADHD (attention-deficit hyperactivity disorder). Haloperidol has been used in the prevention and control of severe nausea and vomiting. | CYP3A4;<br>CYP3A5      | Rv0350 | 9   |
| Heme           | Unkown                                                                                                                                                                                                                                                                                                                                                                                                                                      | CYP3A4;<br>ALOX5; NOS2 | Rv1485 | 213 |
| Hydrocortisone | For the relief of the inflammatory and pruritic manifestations of corticosteroid-responsive dermatoses. Also used to treat endocrine (hormonal) disorders (adrenal insufficiency, Addisons disease). It is also used to treat many immune and allergic disorders, such as arthritis, lupus, severe psoriasis, severe asthma, ulcerative colitis, and Crohn's disease.                                                                       | CYP3A4;<br>CYP3A5      |        | 380 |
| Imatinib       | For the treatment of Philadelphia chromosome positive chronic myeloid leukemia (Ph+ CML), Ph+ acute lymphoblastic leukaemia, myelodysplastic/myeloproliferative diseases, aggressive systemic mastocytosis, hypereosinophilic syndrome and/or chronic eosinophilic leukemia (CEL), dermatofibrosarcoma protuberans, and malignant gastrointestinal stromal tumors                                                                           | CYP3A4;<br>CYP3A5      |        | 11  |

|                      |                                                                                                                                                                                                                                                                                                                                                                                                                                                                                                                                                                                                                                                               |                       |  |     |
|----------------------|---------------------------------------------------------------------------------------------------------------------------------------------------------------------------------------------------------------------------------------------------------------------------------------------------------------------------------------------------------------------------------------------------------------------------------------------------------------------------------------------------------------------------------------------------------------------------------------------------------------------------------------------------------------|-----------------------|--|-----|
|                      | (GIST).                                                                                                                                                                                                                                                                                                                                                                                                                                                                                                                                                                                                                                                       |                       |  |     |
| Indinavir            | Indinavir is an antiretroviral drug for the treatment of HIV infection.                                                                                                                                                                                                                                                                                                                                                                                                                                                                                                                                                                                       | CYP3A4;<br>CYP3A5     |  | 26  |
| Infliximab           | To manage the signs and symptoms, as well as to induce and maintain clinical remission in adults with moderate to severe active Crohn's disease or ulcerative colitis. Also used to manage signs and symptoms of rheumatoid arthritis (in conjunction with methotrexate), ankylosing spondylitis, psoriatic arthritis, and juvenile arthritis.                                                                                                                                                                                                                                                                                                                | LTA; TNF              |  | 553 |
| Insulin, Porcine     | For the treatment of type I and II diabetes mellitus.                                                                                                                                                                                                                                                                                                                                                                                                                                                                                                                                                                                                         | HLA-DQB1;<br>HLA-DQA2 |  | 0   |
| Interferon Gamma-1B  | Interferon gamma-1b is used for the treatment of Chronic granulomatous disease and Osteopetrosis.                                                                                                                                                                                                                                                                                                                                                                                                                                                                                                                                                             | IFNGR1;<br>IFNGR2     |  | 1   |
| Irinotecan           | For the treatment of metastatic colorectal cancer (first-line therapy when administered with 5-fluorouracil and leucovorin). Also used in combination with cisplatin for the treatment of extensive small cell lung cancer. Irinotecan is currently under investigation for the treatment of metastatic or recurrent cervical cancer.                                                                                                                                                                                                                                                                                                                         | CYP3A4;<br>CYP3A5     |  | 5   |
| L-Carnitine          | For treatment of primary systemic carnitine deficiency, a genetic impairment of normal biosynthesis or utilization of levocarnitine from dietary sources, or for the treatment of secondary carnitine deficiency resulting from an inborn error of metabolism such as glutaric aciduria II, methyl malonic aciduria, propionic acidemia, and medium chain fatty acylCoA dehydrogenase deficiency. Used therapeutically to stimulate gastric and pancreatic secretions and in the treatment of hyperlipoproteinemias. Parenteral levocarnitine is indicated for the prevention and treatment of carnitine deficiency in patients with end-stage renal disease. | SLC22A4;<br>SLC22A5   |  | 9   |
| Lercanidipine        | For the treatment of Hypertension, management of angina pectoris and Raynaud's syndrome                                                                                                                                                                                                                                                                                                                                                                                                                                                                                                                                                                       | CYP3A4;<br>CYP3A5     |  | 0   |
| Levomethadyl Acetate | For the treatment and management of opiate dependence. It is sometimes used to treat severe                                                                                                                                                                                                                                                                                                                                                                                                                                                                                                                                                                   | CYP3A4;<br>CYP3A5     |  | 0   |



|              |                                                                                                                                                                                                                                                                                                                                                                                                                                                                                                                                                                                                                                                                                                                                                                                                                                                                                                                                                                                                                                                                                                                         |                   |         |     |
|--------------|-------------------------------------------------------------------------------------------------------------------------------------------------------------------------------------------------------------------------------------------------------------------------------------------------------------------------------------------------------------------------------------------------------------------------------------------------------------------------------------------------------------------------------------------------------------------------------------------------------------------------------------------------------------------------------------------------------------------------------------------------------------------------------------------------------------------------------------------------------------------------------------------------------------------------------------------------------------------------------------------------------------------------------------------------------------------------------------------------------------------------|-------------------|---------|-----|
|              | pain in terminal patients.                                                                                                                                                                                                                                                                                                                                                                                                                                                                                                                                                                                                                                                                                                                                                                                                                                                                                                                                                                                                                                                                                              |                   |         |     |
| Lidocaine    | For production of local or regional anesthesia by infiltration techniques such as percutaneous injection and intravenous regional anesthesia by peripheral nerve block techniques such as brachial plexus and intercostal and by central neural techniques such as lumbar and caudal epidural blocks.                                                                                                                                                                                                                                                                                                                                                                                                                                                                                                                                                                                                                                                                                                                                                                                                                   | CYP3A4;<br>CYP3A5 |         | 25  |
| Lovastatin   | For management as an adjunct to diet to reduce elevated total-C, LDL-C, apo B, and TG levels in patients with primary hypercholesterolemia and mixed dyslipidemia. For primary prevention of coronary heart disease and to slow progression of coronary atherosclerosis in patients with coronary heart disease.                                                                                                                                                                                                                                                                                                                                                                                                                                                                                                                                                                                                                                                                                                                                                                                                        | CYP3A4;<br>CYP3A5 |         | 8   |
| Methadone    | For the treatment of dry cough, drug withdrawal syndrome, opioid type drug dependence, and pain.                                                                                                                                                                                                                                                                                                                                                                                                                                                                                                                                                                                                                                                                                                                                                                                                                                                                                                                                                                                                                        | CYP3A4;<br>CYP3A5 |         | 104 |
| Methotrexate | Methotrexate is indicated in the treatment of gestational choriocarcinoma, chorioadenoma destruens and hydatidiform mole. In acute lymphocytic leukemia, methotrexate is indicated in the prophylaxis of meningeal leukemia and is used in maintenance therapy in combination with other chemotherapeutic agents. Methotrexate is also indicated in the treatment of meningeal leukemia. Methotrexate is used alone or in combination with other anticancer agents in the treatment of breast cancer, epidermoid cancers of the head and neck, advanced mycosis fungoides (cutaneous T cell lymphoma), and lung cancer, particularly squamous cell and small cell types. Methotrexate is also used in combination with other chemotherapeutic agents in the treatment of advanced stage non-Hodgkin's lymphomas. Methotrexate is indicated in the symptomatic control of severe, recalcitrant, disabling psoriasis. Methotrexate is indicated in the management of selected adults with severe, active rheumatoid arthritis (ACR criteria), or children with active polyarticular-course juvenile rheumatoid arthritis. | TLR4; PTPN22      | Rv2391  | 303 |
| Minocycline  | For the treatment of infections caused by                                                                                                                                                                                                                                                                                                                                                                                                                                                                                                                                                                                                                                                                                                                                                                                                                                                                                                                                                                                                                                                                               | ALOX5; IL1B       | Rv0667; | 65  |

|              |                                                                                                                                                                                                                                                                                                                                 |                               |         |    |
|--------------|---------------------------------------------------------------------------------------------------------------------------------------------------------------------------------------------------------------------------------------------------------------------------------------------------------------------------------|-------------------------------|---------|----|
|              | susceptible strains of microorganisms, such as Rocky Mountain spotted fever, typhus fever and the typhus group, Q fever, rickettsial pox and tick fevers caused by Rickettsiae, upper respiratory tract infections caused by Streptococcus pneumoniae and for the treatment of asymptomatic carriers of Neisseria meningitidis. |                               | Rv0440  |    |
| Nateglinide  | For the treatment of non-insulin dependent-diabetes mellitus in conjunction with diet and exercise.                                                                                                                                                                                                                             | CYP3A4;<br>CYP3A5             |         | 0  |
| Nelfinavir   | Used in combination with other antiviral drugs in the treatment of HIV in both adults and children.                                                                                                                                                                                                                             | AKT1;<br>CYP2C19              |         | 15 |
| Nisoldipine  | For the treatment of hypertension. It may be used alone or in combination with other antihypertensive agents.                                                                                                                                                                                                                   | CYP3A4;<br>CYP3A5             |         | 2  |
| Nitrendipine | For the treatment of mild to moderate hypertension                                                                                                                                                                                                                                                                              | CYP3A4;<br>CYP3A5             |         | 0  |
| Ondansetron  | For the prevention of nausea and vomiting associated with emetogenic cancer chemotherapy, postoperation, and radiation. Also used for the treatment of postoperative nausea and vomiting.                                                                                                                                       | CYP3A4;<br>CYP3A5             |         | 1  |
| Paclitaxel   | Used in the treatment of Kaposi's sarcoma and cancer of the lung, ovarian, and breast. Abraxane® is specifically indicated for the treatment of metastatic breast cancer and locally advanced or metastatic non-small cell lung cancer.                                                                                         | CYP3A4;<br>CYP3A5             |         | 17 |
| Paliperidone | For the treatment of schizophrenia.                                                                                                                                                                                                                                                                                             | CYP3A4;<br>CYP3A5             |         | 0  |
| Phenytoin    | For the control of generalized tonic-clonic (grand mal) and complex partial (psychomotor, temporal lobe) seizures and prevention and treatment of seizures occurring during or following neurosurgery.                                                                                                                          | HLA-B;<br>CYP2C19             |         | 49 |
| Pimozide     | Used for the suppression of motor and phonic tics in patients with Tourette's Disorder who have failed to respond satisfactorily to standard treatment.                                                                                                                                                                         | CYP3A4;<br>CYP3A5             |         | 0  |
| Progesterone | For progesterone supplementation or replacement as part of an Assisted Reproductive Technology (ART) treatment for                                                                                                                                                                                                              | CYP3A4;<br>CYP3A5;<br>CYP2C19 | Rv1017c | 56 |

|             |                                                                                                                                                                                                                                                                                                                                                                                                                                         |                               |         |    |
|-------------|-----------------------------------------------------------------------------------------------------------------------------------------------------------------------------------------------------------------------------------------------------------------------------------------------------------------------------------------------------------------------------------------------------------------------------------------|-------------------------------|---------|----|
|             | infertile women with progesterone deficiency and for the treatment of secondary amenorrhea. Also used for the reduction of the incidence of endometrial hyperplasia and the attendant risk of endometrial carcinoma in postmenopausal women receiving estrogen replacement therapy, as well as treatment of abnormal uterine bleeding due to hormonal imbalance in the absence of organic pathology such as fibroids or uterine cancer. |                               |         |    |
| Propranolol | For the prophylaxis of migraine.                                                                                                                                                                                                                                                                                                                                                                                                        | CYP3A4;<br>CYP3A5;<br>CYP2C19 | Rv2251  | 13 |
| Quinine     | For the treatment of malaria and leg cramps                                                                                                                                                                                                                                                                                                                                                                                             | CYP3A4;<br>CYP3A5             |         | 24 |
| Rilonacept  | Rilonacept is currently used in the treatment of cryopyrin-associated periodic syndrome. In May 2012, an advisory panel for the FDA voted 11-0 against the use of Rilonacept for the treatment of gout.                                                                                                                                                                                                                                 | IL1B; IL1A                    |         | 1  |
| Risperidone | For the treatment of schizophrenia in adults and in adolescents, ages 13 to 17, and for the short-term treatment of manic or mixed episodes of bipolar I disorder in children and adolescents ages 10 to 17. May also be used to manage symptoms of inappropriate behavior due to aggression and/or psychosis in patients with severe dementia.                                                                                         | CYP3A4;<br>AKT1               |         | 2  |
| Ritonavir   | Indicated in combination with other antiretroviral agents for the treatment of HIV-infection.                                                                                                                                                                                                                                                                                                                                           | CYP3A4;<br>CYP3A5             |         | 94 |
| Salmeterol  | For the treatment of asthma and chronic obstructive pulmonary disease (COPD).                                                                                                                                                                                                                                                                                                                                                           | CYP3A4;<br>CYP3A5             |         | 2  |
| Saquinavir  | For the treatment of HIV-1 with advanced immunodeficiency together with antiretroviral nucleoside analogues.                                                                                                                                                                                                                                                                                                                            | CYP3A4;<br>CYP3A5             |         | 22 |
| Sildenafil  | For the treatment of erectile dysfunction and to relieve symptoms of pulmonary arterial hypertension (PAH).                                                                                                                                                                                                                                                                                                                             | CYP3A4;<br>CYP3A5             |         | 8  |
| Simvastatin | For the treatment of hypercholesterolemia and for the reduction in the risk of cardiac heart disease mortality and cardiovascular events. It can also be used in adolescent patients for the treatment of heterozygous familial                                                                                                                                                                                                         | CYP3A4;<br>CYP3A5             | Rv2444c | 8  |

|               |                                                                                                                                                                                                                                                                                                                                                                                                                                                                                                                                                                                                                                                               |                            |         |    |
|---------------|---------------------------------------------------------------------------------------------------------------------------------------------------------------------------------------------------------------------------------------------------------------------------------------------------------------------------------------------------------------------------------------------------------------------------------------------------------------------------------------------------------------------------------------------------------------------------------------------------------------------------------------------------------------|----------------------------|---------|----|
|               | hypercholesterolemia.                                                                                                                                                                                                                                                                                                                                                                                                                                                                                                                                                                                                                                         |                            |         |    |
| Sirolimus     | For the prophylaxis of organ rejection in patients receiving renal transplants.                                                                                                                                                                                                                                                                                                                                                                                                                                                                                                                                                                               | CYP3A4;<br>CYP3A5;<br>MTOR | Rv2748c | 25 |
| Telithromycin | For the treatment of Pneumococcal infection, acute sinusitis, acute bacterial tonsillitis, acute bronchitis and bronchiolitis, lower respiratory tract infection and lobar (pneumococcal) pneumonia.                                                                                                                                                                                                                                                                                                                                                                                                                                                          | CYP3A4;<br>CYP3A5          |         | 5  |
| Terfenadine   | For the treatment of allergic rhinitis, hay fever, and allergic skin disorders.                                                                                                                                                                                                                                                                                                                                                                                                                                                                                                                                                                               | CYP3A4;<br>CYP3A5          |         | 1  |
| Testosterone  | To be used as hormone replacement or substitution of diminished or absent endogenous testosterone. Use in males: For management of congenital or acquired hypogonadism, hypogonadism associated with HIV infection, and male climacteric (andopause). Use in females: For palliative treatment of androgen-responsive, advanced, inoperable, metastatic (skeletal) carcinoma of the breast in women who are 1-5 years postmenopausal; testosterone esters may be used in combination with estrogens in the management of moderate to severe vasomotor symptoms associated with menopause in women who do not respond to adequately to estrogen therapy alone. | CYP3A4;<br>CYP3A5          |         | 56 |
| Theophylline  | For the treatment of the symptoms and reversible airflow obstruction associated with chronic asthma and other chronic lung diseases, such as emphysema and chronic bronchitis.                                                                                                                                                                                                                                                                                                                                                                                                                                                                                | CYP2E1;<br>CYP3A4          |         | 63 |
| Trazodone     | For the treatment of depression.                                                                                                                                                                                                                                                                                                                                                                                                                                                                                                                                                                                                                              | CYP3A4;<br>CYP3A5          |         | 3  |
| Triazolam     | For the short-term treatment of insomnia.                                                                                                                                                                                                                                                                                                                                                                                                                                                                                                                                                                                                                     | CYP3A4;<br>CYP3A5          |         | 1  |
| Verapamil     | For the treatment of hypertension, angina, and cluster headache prophylaxis.                                                                                                                                                                                                                                                                                                                                                                                                                                                                                                                                                                                  | CYP3A4;<br>CYP3A5          |         | 52 |
| Zaleplon      | For the treatment of short-term treatment of insomnia in adults.                                                                                                                                                                                                                                                                                                                                                                                                                                                                                                                                                                                              | CYP3A4;<br>CYP3A5          | Rv3610c | 0  |
| Zolpidem      | For the short-term treatment of insomnia.                                                                                                                                                                                                                                                                                                                                                                                                                                                                                                                                                                                                                     | CYP3A4;<br>CYP3A5          |         | 1  |

[a] derived from DrugBank (<http://www.drugbank.ca/>).

[b] from the Drug-Gene Interaction database (DGIdb, <http://dgidb.genome.wustl.edu/>).

[c] derived from STITCH (<http://stitch.embl.de/>).

[d] The co-occurrence number is the agent and tuberculosis or Mycobacterium tuberculosis terms in the biomedical literature through the NCBI Medline abstracts by text mining with The Entrez Programming Utilities (E-utilities) ([www.ncbi.nlm.nih.gov/books/NBK25501/](http://www.ncbi.nlm.nih.gov/books/NBK25501/)). When tuberculosis with the agent or Mycobacterium tuberculosis with the agent appeared in the abstract of the same publication, a co-occurrence record was retrieved.
