# Supplementary material
Source: publisher figshare collection journal article supplement (https://tandf.figshare.com/articles/dataset/_/3464246)
Supplement: Supplementary file 3 [file 1]

**Table S1.** The agents targeting immunity-associated pathways<sup>[a]</sup>.

| Agent                                                                                                                                                     | Target   | Pathway             | Immunity association |
|-----------------------------------------------------------------------------------------------------------------------------------------------------------|----------|---------------------|----------------------|
| FONTOLIZUMAB                                                                                                                                              | IFNG     | Allograft rejection | Direct               |
| FUMARIC ACID                                                                                                                                              | IFNG     | Allograft rejection | Direct               |
| CRX-191                                                                                                                                                   | IFNG     | Allograft rejection | Direct               |
| OLSALAZINE                                                                                                                                                | IFNG     | Allograft rejection | Direct               |
| GLUCOSAMINE                                                                                                                                               | IFNG     | Allograft rejection | Direct               |
| CARBAMAZEPINE                                                                                                                                             | HLA-A    | Allograft rejection | Direct               |
| 3-INDOLEBUTYRIC ACID                                                                                                                                      | HLA-A    | Allograft rejection | Direct               |
| ABACAVIR                                                                                                                                                  | HLA-B    | Allograft rejection | Direct               |
| PHENYTOIN                                                                                                                                                 | HLA-B    | Allograft rejection | Direct               |
| CARBAMAZEPINE                                                                                                                                             | HLA-B    | Allograft rejection | Direct               |
| N-FORMYLMETHIONINE                                                                                                                                        | HLA-B    | Allograft rejection | Direct               |
| ASPIRIN                                                                                                                                                   | IL4      | Allograft rejection | Direct               |
| MVA-MUC1-IL2                                                                                                                                              | IL2      | Allograft rejection | Direct               |
| (1H-INDOL-3-YL)-(2-MERCAPTO-ETHOXYIMINO)-ACETIC ACID                                                                                                      | IL2      | Allograft rejection | Direct               |
| 2-[2-(2-CYCLOHEXYL-2-GUANIDINO-ACETYLAMINO)-ACETYLAMINO]-N-(3-MERCAPTO-PROPYL)-PROPIONAMIDE                                                               | IL2      | Allograft rejection | Direct               |
| (R)-N-[2-[1-(AMINOIMINOMETHYL)-3-PIPERIDINYL]-1-OXOETHYL]-4-(PHENYLETHYNYL)-L-PHENYLALANINE METHYLESTER                                                   | IL2      | Allograft rejection | Direct               |
| SP4160                                                                                                                                                    | IL2      | Allograft rejection | Direct               |
| 3-MERCAPTO-1-(1,3,4,9-TETRAHYDRO-B-CARBOLIN-2-YL)-PROPAN-1-ONE                                                                                            | IL2      | Allograft rejection | Direct               |
| SP2456                                                                                                                                                    | IL2      | Allograft rejection | Direct               |
| 5-[2,3-DICHLORO-4-(5-{1-[2-(2-GUANIDINO-4-METHYL-PENTANOYLAMINO)-ACETYL]-PIPERIDIN-4-YL}-1-METHYL-1H-PYRAZOL-3-YL)-PHENOXYMETHYL]-FURAN-2-CARBOXYLIC ACID | IL2      | Allograft rejection | Direct               |
| GLATIRAMER ACETATE                                                                                                                                        | HLA-DRB1 | Allograft rejection | Direct               |
| USTEKINUMAB                                                                                                                                               | IL12B    | Allograft rejection | Direct               |
| 5-MERCAPTO-2-NITRO-BENZOIC ACID                                                                                                                           | IL12B    | Allograft rejection | Direct               |
| ALPHA-D-MANNOSE                                                                                                                                           | IL12B    | Allograft rejection | Direct               |
| AMRINONE                                                                                                                                                  | TNF      | Allograft rejection | Direct               |
| INFLIXIMAB                                                                                                                                                | TNF      | Allograft rejection | Direct               |
| THALIDOMIDE                                                                                                                                               | TNF      | Allograft rejection | Direct               |

|                      |          |                                     |        |
|----------------------|----------|-------------------------------------|--------|
| CLENBUTEROL          | TNF      | Allograft rejection                 | Direct |
| ADALIMUMAB           | TNF      | Allograft rejection                 | Direct |
| ETANERCEPT           | TNF      | Allograft rejection                 | Direct |
| CHLOROQUINE          | TNF      | Allograft rejection                 | Direct |
| PRANLUKAST           | TNF      | Allograft rejection                 | Direct |
| GLUCOSAMINE          | TNF      | Allograft rejection                 | Direct |
| CERTOLIZUMAB PEGOL   | TNF      | Allograft rejection                 | Direct |
| GOLIMUMAB            | TNF      | Allograft rejection                 | Direct |
| CARBAMAZEPINE        | TNF      | Allograft rejection                 | Direct |
| ABACAVIR             | TNF      | Allograft rejection                 | Direct |
| LENALIDOMIDE         | TNF      | Allograft rejection                 | Direct |
| GENZ29155            | TNF      | Allograft rejection                 | Direct |
| CYTOFAB              | TNF      | Allograft rejection                 | Direct |
| CERTOLIZUMAB         | TNF      | Allograft rejection                 | Direct |
| RDP58                | TNF      | Allograft rejection                 | Direct |
| AN0128               | TNF      | Allograft rejection                 | Direct |
| ART621               | TNF      | Allograft rejection                 | Direct |
| CELASTROL            | TNF      | Allograft rejection                 | Direct |
| TALACTOFERRIN ALFA   | TNF      | Allograft rejection                 | Direct |
| RDP-58               | TNF      | Allograft rejection                 | Direct |
| PENTOXIFYLLINE       | TNF      | Allograft rejection                 | Direct |
| IP-751               | TNF      | Allograft rejection                 | Direct |
| CRX-191              | TNF      | Allograft rejection                 | Direct |
| PIRFENIDONE          | TNF      | Allograft rejection                 | Direct |
| TGAAC-94             | TNF      | Allograft rejection                 | Direct |
| AMOXICILLIN          | HLA-DQB1 | Allograft rejection                 | Direct |
| CLAVULANATE          | HLA-DQB1 | Allograft rejection                 | Direct |
| INSULIN, PORCINE     | HLA-DQB1 | Allograft rejection                 | Direct |
| INSULIN, PORCINE     | HLA-DQA2 | Allograft rejection                 | Direct |
| INTERFERON BETA-1A   | HLA-DQA1 | Allograft rejection                 | Direct |
| INTERFERON BETA-1B   | HLA-DQA1 | Allograft rejection                 | Direct |
| CARBAMAZEPINE        | HLA-A    | Antigen processing and presentation | Direct |
| 3-INDOLEBUTYRIC ACID | HLA-A    | Antigen processing and presentation | Direct |
| ABACAVIR             | HLA-B    | Antigen processing and presentation | Direct |
| PHENYTOIN            | HLA-B    | Antigen processing and presentation | Direct |
| CARBAMAZEPINE        | HLA-B    | Antigen processing and presentation | Direct |
| N-FORMYLMETHIONINE   | HLA-B    | Antigen processing and presentation | Direct |
| INFLIXIMAB           | LTA      | Antigen processing and presentation | Direct |
| ETANERCEPT           | LTA      | Antigen processing and presentation | Direct |
| ADALIMUMAB           | LTA      | Antigen processing and presentation | Direct |
| CARBAMAZEPINE        | LTA      | Antigen processing and presentation | Direct |
| ANTI-LT ALPHA        | LTA      | Antigen processing and presentation | Direct |
| GLATIRAMER ACETATE   | HLA-DRB1 | Antigen processing and presentation | Direct |

|                          |          |                                     |          |
|--------------------------|----------|-------------------------------------|----------|
| AMOXICILLIN              | HLA-DQB1 | Antigen processing and presentation | Direct   |
| CLAVULANATE              | HLA-DQB1 | Antigen processing and presentation | Direct   |
| INSULIN, PORCINE         | HLA-DQB1 | Antigen processing and presentation | Direct   |
| INSULIN, PORCINE         | HLA-DQA2 | Antigen processing and presentation | Direct   |
| ADENOSINE-5'-DIPHOSPHATE | TAP1     | Antigen processing and presentation | Direct   |
| INTERFERON BETA-1A       | HLA-DQA1 | Antigen processing and presentation | Direct   |
| INTERFERON BETA-1B       | HLA-DQA1 | Antigen processing and presentation | Direct   |
| ASPIRIN                  | IL4      | Asthma                              | Indirect |
| GLATIRAMER ACETATE       | HLA-DRB1 | Asthma                              | Indirect |
| AMRINONE                 | TNF      | Asthma                              | Indirect |
| INFLIXIMAB               | TNF      | Asthma                              | Indirect |
| THALIDOMIDE              | TNF      | Asthma                              | Indirect |
| CLENBUTEROL              | TNF      | Asthma                              | Indirect |
| ADALIMUMAB               | TNF      | Asthma                              | Indirect |
| ETANERCEPT               | TNF      | Asthma                              | Indirect |
| CHLOROQUINE              | TNF      | Asthma                              | Indirect |
| PRANLUKAST               | TNF      | Asthma                              | Indirect |
| GLUCOSAMINE              | TNF      | Asthma                              | Indirect |
| CERTOLIZUMAB PEGOL       | TNF      | Asthma                              | Indirect |
| GOLIMUMAB                | TNF      | Asthma                              | Indirect |
| CARBAMAZEPINE            | TNF      | Asthma                              | Indirect |
| ABACAVIR                 | TNF      | Asthma                              | Indirect |
| LENALIDOMIDE             | TNF      | Asthma                              | Indirect |
| GENZ29155                | TNF      | Asthma                              | Indirect |
| CYTOFAB                  | TNF      | Asthma                              | Indirect |
| CERTOLIZUMAB             | TNF      | Asthma                              | Indirect |
| RDP58                    | TNF      | Asthma                              | Indirect |
| AN0128                   | TNF      | Asthma                              | Indirect |
| ART621                   | TNF      | Asthma                              | Indirect |
| CELASTROL                | TNF      | Asthma                              | Indirect |
| TALACTOFERRIN ALFA       | TNF      | Asthma                              | Indirect |
| RDP-58                   | TNF      | Asthma                              | Indirect |
| PENTOXIFYLLINE           | TNF      | Asthma                              | Indirect |
| IP-751                   | TNF      | Asthma                              | Indirect |
| CRX-191                  | TNF      | Asthma                              | Indirect |
| PIRFENIDONE              | TNF      | Asthma                              | Indirect |
| TGAAC-94                 | TNF      | Asthma                              | Indirect |
| AMOXICILLIN              | HLA-DQB1 | Asthma                              | Indirect |
| CLAVULANATE              | HLA-DQB1 | Asthma                              | Indirect |
| INSULIN, PORCINE         | HLA-DQB1 | Asthma                              | Indirect |
| INSULIN, PORCINE         | HLA-DQA2 | Asthma                              | Indirect |
| INTERFERON BETA-1A       | HLA-DQA1 | Asthma                              | Indirect |
| INTERFERON BETA-1B       | HLA-DQA1 | Asthma                              | Indirect |

|                                                                                                                                                           |          |                                        |        |
|-----------------------------------------------------------------------------------------------------------------------------------------------------------|----------|----------------------------------------|--------|
| CARBAMAZEPINE                                                                                                                                             | HLA-A    | Autoimmune thyroid disease             | Direct |
| 3-INDOLEBUTYRIC ACID                                                                                                                                      | HLA-A    | Autoimmune thyroid disease             | Direct |
| ABACAVIR                                                                                                                                                  | HLA-B    | Autoimmune thyroid disease             | Direct |
| PHENYTOIN                                                                                                                                                 | HLA-B    | Autoimmune thyroid disease             | Direct |
| CARBAMAZEPINE                                                                                                                                             | HLA-B    | Autoimmune thyroid disease             | Direct |
| N-FORMYLMETHIONINE                                                                                                                                        | HLA-B    | Autoimmune thyroid disease             | Direct |
| ASPIRIN                                                                                                                                                   | IL4      | Autoimmune thyroid disease             | Direct |
| MVA-MUC1-IL2                                                                                                                                              | IL2      | Autoimmune thyroid disease             | Direct |
| (1H-INDOL-3-YL)-(2-MERCAPTO-ETHOXYIMINO)-ACETIC ACID                                                                                                      | IL2      | Autoimmune thyroid disease             | Direct |
| 2-[2-(2-CYCLOHEXYL-2-GUANIDINO-ACETYLAMINO)-ACETYLAMINO]-N-(3-MERCAPTO-PROPYL)-PROPIONAMIDE                                                               | IL2      | Autoimmune thyroid disease             | Direct |
| (R)-N-[2-[1-(AMINOIMINOMETHYL)-3-PIPERIDINYL]-1-OXOETHYL]-4-(PHENYLETHYNYL)-L-PHENYLALANINE METHYLESTER                                                   | IL2      | Autoimmune thyroid disease             | Direct |
| SP4160                                                                                                                                                    | IL2      | Autoimmune thyroid disease             | Direct |
| 3-MERCAPTO-1-(1,3,4,9-TETRAHYDRO-B-CARBOLIN-2-YL)-PROPAN-1-ONE                                                                                            | IL2      | Autoimmune thyroid disease             | Direct |
| SP2456                                                                                                                                                    | IL2      | Autoimmune thyroid disease             | Direct |
| 5-[2,3-DICHLORO-4-(5-{1-[2-(2-GUANIDINO-4-METHYL-PENTANOYLAMINO)-ACETYL]-PIPERIDIN-4-YL}-1-METHYL-1H-PYRAZOL-3-YL)-PHENOXYMETHYL]-FURAN-2-CARBOXYLIC ACID | IL2      | Autoimmune thyroid disease             | Direct |
| GLATIRAMER ACETATE                                                                                                                                        | HLA-DRB1 | Autoimmune thyroid disease             | Direct |
| AMOXICILLIN                                                                                                                                               | HLA-DQB1 | Autoimmune thyroid disease             | Direct |
| CLAVULANATE                                                                                                                                               | HLA-DQB1 | Autoimmune thyroid disease             | Direct |
| INSULIN, PORCINE                                                                                                                                          | HLA-DQB1 | Autoimmune thyroid disease             | Direct |
| INSULIN, PORCINE                                                                                                                                          | HLA-DQA2 | Autoimmune thyroid disease             | Direct |
| INTERFERON BETA-1A                                                                                                                                        | HLA-DQA1 | Autoimmune thyroid disease             | Direct |
| INTERFERON BETA-1B                                                                                                                                        | HLA-DQA1 | Autoimmune thyroid disease             | Direct |
| FONTOLIZUMAB                                                                                                                                              | IFNG     | Cytokine-cytokine receptor interaction | Direct |
| FUMARIC ACID                                                                                                                                              | IFNG     | Cytokine-cytokine receptor interaction | Direct |
| CRX-191                                                                                                                                                   | IFNG     | Cytokine-cytokine receptor interaction | Direct |
| OLSALAZINE                                                                                                                                                | IFNG     | Cytokine-cytokine receptor interaction | Direct |
| GLUCOSAMINE                                                                                                                                               | IFNG     | Cytokine-cytokine receptor interaction | Direct |
| TINZAPARIN                                                                                                                                                | CXCL12   | Cytokine-cytokine receptor interaction | Direct |
| HEPARIN DISACCHARIDE III-S                                                                                                                                | CCL5     | Cytokine-cytokine receptor interaction | Direct |
| HEPARIN DISACCHARIDE I-S                                                                                                                                  | CCL5     | Cytokine-cytokine receptor interaction | Direct |
| 6-[3-(4-MORPHOLINYL)PROPYL]-2-(3-                                                                                                                         | TNFRSF1A | Cytokine-cytokine receptor interaction | Direct |

|                                                                                                                                                                               |        |                                        |        |
|-------------------------------------------------------------------------------------------------------------------------------------------------------------------------------|--------|----------------------------------------|--------|
| NITROPHENYL)-5-THIOXO-5,6,-<br>DIHYDRO-7H-<br>THIENOL[2',3':4,5]PYRROLO[1,2-<br>C]IMIDAZOL-7-ONE                                                                              |        |                                        |        |
| ASPIRIN                                                                                                                                                                       | IL4    | Cytokine-cytokine receptor interaction | Direct |
| MVA-MUC1-IL2                                                                                                                                                                  | IL2    | Cytokine-cytokine receptor interaction | Direct |
| (1H-INDOL-3-YL)-(2-MERCAPTO-<br>ETHOXYIMINO)-ACETIC ACID                                                                                                                      | IL2    | Cytokine-cytokine receptor interaction | Direct |
| 2-[2-(2-CYCLOHEXYL-2-GUANIDINO-<br>ACETYLAMINO)-ACETYLAMINO]-N-(3-<br>MERCAPTO-PROPYL)-PROPIONAMIDE                                                                           | IL2    | Cytokine-cytokine receptor interaction | Direct |
| (R)-N-[2-[1-(AMINOIMINOMETHYL)-3-<br>PIPERIDINYL]-1-OXOETHYL]-4-<br>(PHENYLETHYNYL)-L-PHENYLALANINE<br>METHYLESTER                                                            | IL2    | Cytokine-cytokine receptor interaction | Direct |
| SP4160                                                                                                                                                                        | IL2    | Cytokine-cytokine receptor interaction | Direct |
| 3-MERCAPTO-1-(1,3,4,9-TETRAHYDRO-B-<br>CARBOLIN-2-YL)-PROPAN-1-ONE                                                                                                            | IL2    | Cytokine-cytokine receptor interaction | Direct |
| SP2456                                                                                                                                                                        | IL2    | Cytokine-cytokine receptor interaction | Direct |
| 5-[2,3-DICHLORO-4-(5-{1-[2-(2-<br>GUANIDINO-4-METHYL-<br>PENTANOYLAMINO)-ACETYL]-<br>PIPERIDIN-4-YL}-1-METHYL-1H-<br>PYRAZOL-3-YL)-PHENOXYMETHYL]-<br>FURAN-2-CARBOXYLIC ACID | IL2    | Cytokine-cytokine receptor interaction | Direct |
| INTERFERON GAMMA-1B                                                                                                                                                           | IFNGR1 | Cytokine-cytokine receptor interaction | Direct |
| TOCILIZUMAB                                                                                                                                                                   | IL6R   | Cytokine-cytokine receptor interaction | Direct |
| SAR153191                                                                                                                                                                     | IL6R   | Cytokine-cytokine receptor interaction | Direct |
| ALPHA-D-MANNOSE                                                                                                                                                               | IL6R   | Cytokine-cytokine receptor interaction | Direct |
| INFLIXIMAB                                                                                                                                                                    | LTA    | Cytokine-cytokine receptor interaction | Direct |
| ETANERCEPT                                                                                                                                                                    | LTA    | Cytokine-cytokine receptor interaction | Direct |
| ADALIMUMAB                                                                                                                                                                    | LTA    | Cytokine-cytokine receptor interaction | Direct |
| CARBAMAZEPINE                                                                                                                                                                 | LTA    | Cytokine-cytokine receptor interaction | Direct |
| ANTI-LT ALPHA                                                                                                                                                                 | LTA    | Cytokine-cytokine receptor interaction | Direct |
| USTEKINUMAB                                                                                                                                                                   | IL12B  | Cytokine-cytokine receptor interaction | Direct |
| 5-MERCAPTO-2-NITRO-BENZOIC ACID                                                                                                                                               | IL12B  | Cytokine-cytokine receptor interaction | Direct |
| ALPHA-D-MANNOSE                                                                                                                                                               | IL12B  | Cytokine-cytokine receptor interaction | Direct |
| AMRINONE                                                                                                                                                                      | TNF    | Cytokine-cytokine receptor interaction | Direct |
| INFLIXIMAB                                                                                                                                                                    | TNF    | Cytokine-cytokine receptor interaction | Direct |
| THALIDOMIDE                                                                                                                                                                   | TNF    | Cytokine-cytokine receptor interaction | Direct |
| CLENBUTEROL                                                                                                                                                                   | TNF    | Cytokine-cytokine receptor interaction | Direct |
| ADALIMUMAB                                                                                                                                                                    | TNF    | Cytokine-cytokine receptor interaction | Direct |
| ETANERCEPT                                                                                                                                                                    | TNF    | Cytokine-cytokine receptor interaction | Direct |

|                                                    |          |                                        |        |
|----------------------------------------------------|----------|----------------------------------------|--------|
| CHLOROQUINE                                        | TNF      | Cytokine-cytokine receptor interaction | Direct |
| PRANLUKAST                                         | TNF      | Cytokine-cytokine receptor interaction | Direct |
| GLUCOSAMINE                                        | TNF      | Cytokine-cytokine receptor interaction | Direct |
| CERTOLIZUMAB PEGOL                                 | TNF      | Cytokine-cytokine receptor interaction | Direct |
| GOLIMUMAB                                          | TNF      | Cytokine-cytokine receptor interaction | Direct |
| CARBAMAZEPINE                                      | TNF      | Cytokine-cytokine receptor interaction | Direct |
| ABACAVIR                                           | TNF      | Cytokine-cytokine receptor interaction | Direct |
| LENALIDOMIDE                                       | TNF      | Cytokine-cytokine receptor interaction | Direct |
| GENZ29155                                          | TNF      | Cytokine-cytokine receptor interaction | Direct |
| CYTOFAB                                            | TNF      | Cytokine-cytokine receptor interaction | Direct |
| CERTOLIZUMAB                                       | TNF      | Cytokine-cytokine receptor interaction | Direct |
| RDP58                                              | TNF      | Cytokine-cytokine receptor interaction | Direct |
| AN0128                                             | TNF      | Cytokine-cytokine receptor interaction | Direct |
| ART621                                             | TNF      | Cytokine-cytokine receptor interaction | Direct |
| CELASTROL                                          | TNF      | Cytokine-cytokine receptor interaction | Direct |
| TALACTOFERRIN ALFA                                 | TNF      | Cytokine-cytokine receptor interaction | Direct |
| RDP-58                                             | TNF      | Cytokine-cytokine receptor interaction | Direct |
| PENTOXIFYLLINE                                     | TNF      | Cytokine-cytokine receptor interaction | Direct |
| IP-751                                             | TNF      | Cytokine-cytokine receptor interaction | Direct |
| CRX-191                                            | TNF      | Cytokine-cytokine receptor interaction | Direct |
| PIRFENIDONE                                        | TNF      | Cytokine-cytokine receptor interaction | Direct |
| TGAAC-94                                           | TNF      | Cytokine-cytokine receptor interaction | Direct |
| RISEDRONATE                                        | IL1B     | Cytokine-cytokine receptor interaction | Direct |
| TILUDRONATE                                        | IL1B     | Cytokine-cytokine receptor interaction | Direct |
| BISPHOSPHONATES                                    | IL1B     | Cytokine-cytokine receptor interaction | Direct |
| ETIDRONIC ACID                                     | IL1B     | Cytokine-cytokine receptor interaction | Direct |
| CLODRONATE                                         | IL1B     | Cytokine-cytokine receptor interaction | Direct |
| CANAKINUMAB                                        | IL1B     | Cytokine-cytokine receptor interaction | Direct |
| K-832                                              | IL1B     | Cytokine-cytokine receptor interaction | Direct |
| RILONACEPT                                         | IL1B     | Cytokine-cytokine receptor interaction | Direct |
| AMG108                                             | IL1B     | Cytokine-cytokine receptor interaction | Direct |
| CELASTROL                                          | IL1B     | Cytokine-cytokine receptor interaction | Direct |
| IBUDILAST                                          | IL1B     | Cytokine-cytokine receptor interaction | Direct |
| GALLIUM NITRATE                                    | IL1B     | Cytokine-cytokine receptor interaction | Direct |
| GLUCOSAMINE                                        | IL1B     | Cytokine-cytokine receptor interaction | Direct |
| MINOCYCLINE                                        | IL1B     | Cytokine-cytokine receptor interaction | Direct |
| ETANERCEPT                                         | TNFRSF1B | Cytokine-cytokine receptor interaction | Direct |
| INTERFERON GAMMA-1B                                | IFNGR2   | Cytokine-cytokine receptor interaction | Direct |
| TUMOR NECROSIS FACTOR ALPHA (TNF-ALPHA) INHIBITORS | IL6      | Cytokine-cytokine receptor interaction | Direct |
| GINSENG                                            | IL6      | Cytokine-cytokine receptor interaction | Direct |
| ALD518                                             | IL6      | Cytokine-cytokine receptor interaction | Direct |
| IBOCTADEKIN + DOXIL                                | IL18     | Cytokine-cytokine receptor interaction | Direct |

|                                                                                                                                                           |          |                                        |        |
|-----------------------------------------------------------------------------------------------------------------------------------------------------------|----------|----------------------------------------|--------|
| IBOCTADEKIN & RITUXIMAB                                                                                                                                   | IL18     | Cytokine-cytokine receptor interaction | Direct |
| IL-18BP                                                                                                                                                   | IL18     | Cytokine-cytokine receptor interaction | Direct |
| RS-504393                                                                                                                                                 | CCL2     | Cytokine-cytokine receptor interaction | Direct |
| MCP-1                                                                                                                                                     | CCL2     | Cytokine-cytokine receptor interaction | Direct |
| DANAZOL                                                                                                                                                   | CCL2     | Cytokine-cytokine receptor interaction | Direct |
| MIMOSINE                                                                                                                                                  | CCL2     | Cytokine-cytokine receptor interaction | Direct |
| CYCLOPHOSPHAMIDE                                                                                                                                          | IL8      | Cytokine-cytokine receptor interaction | Direct |
| BEVACIZUMAB                                                                                                                                               | IL8      | Cytokine-cytokine receptor interaction | Direct |
| ANAKINRA                                                                                                                                                  | IL1R1    | Cytokine-cytokine receptor interaction | Direct |
| RILONACEPT                                                                                                                                                | IL1A     | Cytokine-cytokine receptor interaction | Direct |
| FONTOLIZUMAB                                                                                                                                              | IFNG     | Graft-versus-host disease              | Direct |
| FUMARIC ACID                                                                                                                                              | IFNG     | Graft-versus-host disease              | Direct |
| CRX-191                                                                                                                                                   | IFNG     | Graft-versus-host disease              | Direct |
| OLSALAZINE                                                                                                                                                | IFNG     | Graft-versus-host disease              | Direct |
| GLUCOSAMINE                                                                                                                                               | IFNG     | Graft-versus-host disease              | Direct |
| CARBAMAZEPINE                                                                                                                                             | HLA-A    | Graft-versus-host disease              | Direct |
| 3-INDOLEBUTYRIC ACID                                                                                                                                      | HLA-A    | Graft-versus-host disease              | Direct |
| ABACAVIR                                                                                                                                                  | HLA-B    | Graft-versus-host disease              | Direct |
| PHENYTOIN                                                                                                                                                 | HLA-B    | Graft-versus-host disease              | Direct |
| CARBAMAZEPINE                                                                                                                                             | HLA-B    | Graft-versus-host disease              | Direct |
| N-FORMYLMETHIONINE                                                                                                                                        | HLA-B    | Graft-versus-host disease              | Direct |
| MVA-MUC1-IL2                                                                                                                                              | IL2      | Graft-versus-host disease              | Direct |
| (1H-INDOL-3-YL)-(2-MERCAPTO-ETHOXYIMINO)-ACETIC ACID                                                                                                      | IL2      | Graft-versus-host disease              | Direct |
| 2-[2-(2-CYCLOHEXYL-2-GUANIDINO-ACETYLAMINO)-ACETYLAMINO]-N-(3-MERCAPTO-PROPYL)-PROPIONAMIDE                                                               | IL2      | Graft-versus-host disease              | Direct |
| (R)-N-[2-[1-(AMINOIMINOMETHYL)-3-PIPERIDINYL]-1-OXOETHYL]-4-(PHENYLETHYNYL)-L-PHENYLALANINE METHYLESTER                                                   | IL2      | Graft-versus-host disease              | Direct |
| SP4160                                                                                                                                                    | IL2      | Graft-versus-host disease              | Direct |
| 3-MERCAPTO-1-(1,3,4,9-TETRAHYDRO-B-CARBOLIN-2-YL)-PROPAN-1-ONE                                                                                            | IL2      | Graft-versus-host disease              | Direct |
| SP2456                                                                                                                                                    | IL2      | Graft-versus-host disease              | Direct |
| 5-[2,3-DICHLORO-4-(5-{1-[2-(2-GUANIDINO-4-METHYL-PENTANOYLAMINO)-ACETYL]-PIPERIDIN-4-YL}-1-METHYL-1H-PYRAZOL-3-YL)-PHENOXYMETHYL]-FURAN-2-CARBOXYLIC ACID | IL2      | Graft-versus-host disease              | Direct |
| GLATIRAMER ACETATE                                                                                                                                        | HLA-DRB1 | Graft-versus-host disease              | Direct |
| AMRINONE                                                                                                                                                  | TNF      | Graft-versus-host disease              | Direct |

|                    |          |                           |        |
|--------------------|----------|---------------------------|--------|
| INFLIXIMAB         | TNF      | Graft-versus-host disease | Direct |
| THALIDOMIDE        | TNF      | Graft-versus-host disease | Direct |
| CLENBUTEROL        | TNF      | Graft-versus-host disease | Direct |
| ADALIMUMAB         | TNF      | Graft-versus-host disease | Direct |
| ETANERCEPT         | TNF      | Graft-versus-host disease | Direct |
| CHLOROQUINE        | TNF      | Graft-versus-host disease | Direct |
| PRANLUKAST         | TNF      | Graft-versus-host disease | Direct |
| GLUCOSAMINE        | TNF      | Graft-versus-host disease | Direct |
| CERTOLIZUMAB PEGOL | TNF      | Graft-versus-host disease | Direct |
| GOLIMUMAB          | TNF      | Graft-versus-host disease | Direct |
| CARBAMAZEPINE      | TNF      | Graft-versus-host disease | Direct |
| ABACAVIR           | TNF      | Graft-versus-host disease | Direct |
| LENALIDOMIDE       | TNF      | Graft-versus-host disease | Direct |
| GENZ29155          | TNF      | Graft-versus-host disease | Direct |
| CYTOFAB            | TNF      | Graft-versus-host disease | Direct |
| CERTOLIZUMAB       | TNF      | Graft-versus-host disease | Direct |
| RDP58              | TNF      | Graft-versus-host disease | Direct |
| AN0128             | TNF      | Graft-versus-host disease | Direct |
| ART621             | TNF      | Graft-versus-host disease | Direct |
| CELASTROL          | TNF      | Graft-versus-host disease | Direct |
| TALACTOFERRIN ALFA | TNF      | Graft-versus-host disease | Direct |
| RDP-58             | TNF      | Graft-versus-host disease | Direct |
| PENTOXIFYLLINE     | TNF      | Graft-versus-host disease | Direct |
| IP-751             | TNF      | Graft-versus-host disease | Direct |
| CRX-191            | TNF      | Graft-versus-host disease | Direct |
| PIRFENIDONE        | TNF      | Graft-versus-host disease | Direct |
| TGAAC-94           | TNF      | Graft-versus-host disease | Direct |
| RISEDRONATE        | IL1B     | Graft-versus-host disease | Direct |
| TILUDRONATE        | IL1B     | Graft-versus-host disease | Direct |
| BISPHOSPHONATES    | IL1B     | Graft-versus-host disease | Direct |
| ETIDRONIC ACID     | IL1B     | Graft-versus-host disease | Direct |
| CLODRONATE         | IL1B     | Graft-versus-host disease | Direct |
| CANAKINUMAB        | IL1B     | Graft-versus-host disease | Direct |
| K-832              | IL1B     | Graft-versus-host disease | Direct |
| RILONACEPT         | IL1B     | Graft-versus-host disease | Direct |
| AMG108             | IL1B     | Graft-versus-host disease | Direct |
| CELASTROL          | IL1B     | Graft-versus-host disease | Direct |
| IBUDILAST          | IL1B     | Graft-versus-host disease | Direct |
| GALLIUM NITRATE    | IL1B     | Graft-versus-host disease | Direct |
| GLUCOSAMINE        | IL1B     | Graft-versus-host disease | Direct |
| MINOCYCLINE        | IL1B     | Graft-versus-host disease | Direct |
| AMOXICILLIN        | HLA-DQB1 | Graft-versus-host disease | Direct |
| CLAVULANATE        | HLA-DQB1 | Graft-versus-host disease | Direct |



|                                                    |          |                            |          |
|----------------------------------------------------|----------|----------------------------|----------|
| INSULIN, PORCINE                                   | HLA-DQB1 | Graft-versus-host disease  | Direct   |
| TUMOR NECROSIS FACTOR ALPHA (TNF-ALPHA) INHIBITORS | IL6      | Graft-versus-host disease  | Direct   |
| GINSENG                                            | IL6      | Graft-versus-host disease  | Direct   |
| ALD518                                             | IL6      | Graft-versus-host disease  | Direct   |
| INSULIN, PORCINE                                   | HLA-DQA2 | Graft-versus-host disease  | Direct   |
| INTERFERON BETA-1A                                 | HLA-DQA1 | Graft-versus-host disease  | Direct   |
| INTERFERON BETA-1B                                 | HLA-DQA1 | Graft-versus-host disease  | Direct   |
| RILONACEPT                                         | IL1A     | Graft-versus-host disease  | Direct   |
| ASPIRIN                                            | IL4      | Hematopoietic cell lineage | Indirect |
| TOCILIZUMAB                                        | IL6R     | Hematopoietic cell lineage | Indirect |
| SAR153191                                          | IL6R     | Hematopoietic cell lineage | Indirect |
| ALPHA-D-MANNOSE                                    | IL6R     | Hematopoietic cell lineage | Indirect |
| GLATIRAMER ACETATE                                 | HLA-DRB1 | Hematopoietic cell lineage | Indirect |
| AMRINONE                                           | TNF      | Hematopoietic cell lineage | Indirect |
| INFLIXIMAB                                         | TNF      | Hematopoietic cell lineage | Indirect |
| THALIDOMIDE                                        | TNF      | Hematopoietic cell lineage | Indirect |
| CLENBUTEROL                                        | TNF      | Hematopoietic cell lineage | Indirect |
| ADALIMUMAB                                         | TNF      | Hematopoietic cell lineage | Indirect |
| ETANERCEPT                                         | TNF      | Hematopoietic cell lineage | Indirect |
| CHLOROQUINE                                        | TNF      | Hematopoietic cell lineage | Indirect |
| PRANLUKAST                                         | TNF      | Hematopoietic cell lineage | Indirect |
| GLUCOSAMINE                                        | TNF      | Hematopoietic cell lineage | Indirect |
| CERTOLIZUMAB PEGOL                                 | TNF      | Hematopoietic cell lineage | Indirect |
| GOLIMUMAB                                          | TNF      | Hematopoietic cell lineage | Indirect |
| CARBAMAZEPINE                                      | TNF      | Hematopoietic cell lineage | Indirect |
| ABACAVIR                                           | TNF      | Hematopoietic cell lineage | Indirect |
| LENALIDOMIDE                                       | TNF      | Hematopoietic cell lineage | Indirect |
| GENZ29155                                          | TNF      | Hematopoietic cell lineage | Indirect |
| CYTOFAB                                            | TNF      | Hematopoietic cell lineage | Indirect |
| CERTOLIZUMAB                                       | TNF      | Hematopoietic cell lineage | Indirect |
| RDP58                                              | TNF      | Hematopoietic cell lineage | Indirect |
| AN0128                                             | TNF      | Hematopoietic cell lineage | Indirect |
| ART621                                             | TNF      | Hematopoietic cell lineage | Indirect |
| CELASTROL                                          | TNF      | Hematopoietic cell lineage | Indirect |
| TALACTOFERRIN ALFA                                 | TNF      | Hematopoietic cell lineage | Indirect |
| RDP-58                                             | TNF      | Hematopoietic cell lineage | Indirect |
| PENTOXIFYLLINE                                     | TNF      | Hematopoietic cell lineage | Indirect |
| IP-751                                             | TNF      | Hematopoietic cell lineage | Indirect |
| CRX-191                                            | TNF      | Hematopoietic cell lineage | Indirect |
| PIRFENIDONE                                        | TNF      | Hematopoietic cell lineage | Indirect |
| TGAAC-94                                           | TNF      | Hematopoietic cell lineage | Indirect |
| RISEDRONATE                                        | IL1B     | Hematopoietic cell lineage | Indirect |

|                                                                                                         |        |                                              |          |
|---------------------------------------------------------------------------------------------------------|--------|----------------------------------------------|----------|
| TILUDRONATE                                                                                             | IL1B   | Hematopoietic cell lineage                   | Indirect |
| BISPHOSPHONATES                                                                                         | IL1B   | Hematopoietic cell lineage                   | Indirect |
| ETIDRONIC ACID                                                                                          | IL1B   | Hematopoietic cell lineage                   | Indirect |
| CLODRONATE                                                                                              | IL1B   | Hematopoietic cell lineage                   | Indirect |
| CANAKINUMAB                                                                                             | IL1B   | Hematopoietic cell lineage                   | Indirect |
| K-832                                                                                                   | IL1B   | Hematopoietic cell lineage                   | Indirect |
| RILONACEPT                                                                                              | IL1B   | Hematopoietic cell lineage                   | Indirect |
| AMG108                                                                                                  | IL1B   | Hematopoietic cell lineage                   | Indirect |
| CELASTROL                                                                                               | IL1B   | Hematopoietic cell lineage                   | Indirect |
| IBUDILAST                                                                                               | IL1B   | Hematopoietic cell lineage                   | Indirect |
| GALLIUM NITRATE                                                                                         | IL1B   | Hematopoietic cell lineage                   | Indirect |
| GLUCOSAMINE                                                                                             | IL1B   | Hematopoietic cell lineage                   | Indirect |
| MINOCYCLINE                                                                                             | IL1B   | Hematopoietic cell lineage                   | Indirect |
| TUMOR NECROSIS FACTOR ALPHA (TNF-ALPHA) INHIBITORS                                                      | IL6    | Hematopoietic cell lineage                   | Indirect |
| GINSENG                                                                                                 | IL6    | Hematopoietic cell lineage                   | Indirect |
| ALD518                                                                                                  | IL6    | Hematopoietic cell lineage                   | Indirect |
| FLUTICASONE PROPIONATE                                                                                  | CD14   | Hematopoietic cell lineage                   | Indirect |
| ANAKINRA                                                                                                | IL1R1  | Hematopoietic cell lineage                   | Indirect |
| RILONACEPT                                                                                              | IL1A   | Hematopoietic cell lineage                   | Indirect |
| TINZAPARIN                                                                                              | CXCL12 | Intestinal immune network for IgA production | Direct   |
| ASPIRIN                                                                                                 | IL4    | Intestinal immune network for IgA production | Direct   |
| MVA-MUC1-IL2                                                                                            | IL2    | Intestinal immune network for IgA production | Direct   |
| (1H-INDOL-3-YL)-(2-MERCAPTO-ETHOXYIMINO)-ACETIC ACID                                                    | IL2    | Intestinal immune network for IgA production | Direct   |
| 2-[2-(2-CYCLOHEXYL-2-GUANIDINO-ACETYLAMINO)-ACETYLAMINO]-N-(3-MERCAPTO-PROPYL)-PROPIONAMIDE             | IL2    | Intestinal immune network for IgA production | Direct   |
| (R)-N-[2-[1-(AMINOIMINOMETHYL)-3-PIPERIDINYL]-1-OXOETHYL]-4-(PHENYLETHYNYL)-L-PHENYLALANINE METHYLESTER | IL2    | Intestinal immune network for IgA production | Direct   |
| SP4160                                                                                                  | IL2    | Intestinal immune network for IgA production | Direct   |
| 3-MERCAPTO-1-(1,3,4,9-TETRAHYDRO-B-CARBOLIN-2-YL)-PROPAN-1-ONE                                          | IL2    | Intestinal immune network for IgA production | Direct   |
| SP2456                                                                                                  | IL2    | Intestinal immune network for IgA production | Direct   |
| 5-[2,3-DICHLORO-4-(5-{1-[2-(2-GUANIDINO-4-METHYL-                                                       | IL2    | Intestinal immune network for IgA production | Direct   |

|                                                                                                                      |          |                                              |        |
|----------------------------------------------------------------------------------------------------------------------|----------|----------------------------------------------|--------|
| PENTANOYLAMINO)-ACETYL]-<br>PIPERIDIN-4-YL}-1-METHYL-1H-<br>PYRAZOL-3-YL)-PHENOXYMETHYL]-<br>FURAN-2-CARBOXYLIC ACID |          |                                              |        |
| GLATIRAMER ACETATE                                                                                                   | HLA-DRB1 | Intestinal immune network for IgA production | Direct |
| AMOXICILLIN                                                                                                          | HLA-DQB1 | Intestinal immune network for IgA production | Direct |
| CLAVULANATE                                                                                                          | HLA-DQB1 | Intestinal immune network for IgA production | Direct |
| INSULIN, PORCINE                                                                                                     | HLA-DQB1 | Intestinal immune network for IgA production | Direct |
| TUMOR NECROSIS FACTOR ALPHA (TNF-<br>ALPHA) INHIBITORS                                                               | IL6      | Intestinal immune network for IgA production | Direct |
| GINSENG                                                                                                              | IL6      | Intestinal immune network for IgA production | Direct |
| ALD518                                                                                                               | IL6      | Intestinal immune network for IgA production | Direct |
| INSULIN, PORCINE                                                                                                     | HLA-DQA2 | Intestinal immune network for IgA production | Direct |
| INTERFERON BETA-1A                                                                                                   | HLA-DQA1 | Intestinal immune network for IgA production | Direct |
| INTERFERON BETA-1B                                                                                                   | HLA-DQA1 | Intestinal immune network for IgA production | Direct |
| OSPA LIPOPROTEIN                                                                                                     | TLR2     | Toll-like receptor signaling pathway         | Direct |
| S-(DIMETHYLARSENIC)CYSTEINE                                                                                          | TLR2     | Toll-like receptor signaling pathway         | Direct |
| HEPARIN DISACCHARIDE III-S                                                                                           | CCL5     | Toll-like receptor signaling pathway         | Direct |
| HEPARIN DISACCHARIDE I-S                                                                                             | CCL5     | Toll-like receptor signaling pathway         | Direct |
| RESATORVID                                                                                                           | TLR4     | Toll-like receptor signaling pathway         | Direct |
| MYRISTIC ACID                                                                                                        | TLR4     | Toll-like receptor signaling pathway         | Direct |
| 3-HYDROXY-MYRISTIC ACID                                                                                              | TLR4     | Toll-like receptor signaling pathway         | Direct |
| FOLIC ACID                                                                                                           | TLR4     | Toll-like receptor signaling pathway         | Direct |
| METHOTREXATE                                                                                                         | TLR4     | Toll-like receptor signaling pathway         | Direct |
| CPG 52364                                                                                                            | TLR9     | Toll-like receptor signaling pathway         | Direct |
| IMO-2125                                                                                                             | TLR9     | Toll-like receptor signaling pathway         | Direct |
| IMO-2055                                                                                                             | TLR9     | Toll-like receptor signaling pathway         | Direct |
| AGATOLIMOD                                                                                                           | TLR9     | Toll-like receptor signaling pathway         | Direct |
| TLR9 AGONIST                                                                                                         | TLR9     | Toll-like receptor signaling pathway         | Direct |
| IMO-3100                                                                                                             | TLR9     | Toll-like receptor signaling pathway         | Direct |
| AVE0675                                                                                                              | TLR9     | Toll-like receptor signaling pathway         | Direct |
| IMO-2134                                                                                                             | TLR9     | Toll-like receptor signaling pathway         | Direct |
| CHLOROQUINE                                                                                                          | TLR9     | Toll-like receptor signaling pathway         | Direct |
| HYDROXYCHLOROQUINE                                                                                                   | TLR9     | Toll-like receptor signaling pathway         | Direct |

|                                                                                           |       |                                      |        |
|-------------------------------------------------------------------------------------------|-------|--------------------------------------|--------|
| PF-3512676                                                                                | TLR9  | Toll-like receptor signaling pathway | Direct |
| USTEKINUMAB                                                                               | IL12B | Toll-like receptor signaling pathway | Direct |
| 5-MERCAPTO-2-NITRO-BENZOIC ACID                                                           | IL12B | Toll-like receptor signaling pathway | Direct |
| ALPHA-D-MANNOSE                                                                           | IL12B | Toll-like receptor signaling pathway | Direct |
| RISPERIDONE                                                                               | AKT1  | Toll-like receptor signaling pathway | Direct |
| MK2206                                                                                    | AKT1  | Toll-like receptor signaling pathway | Direct |
| GSK2126458                                                                                | AKT1  | Toll-like receptor signaling pathway | Direct |
| AZD4547                                                                                   | AKT1  | Toll-like receptor signaling pathway | Direct |
| PERIFOSINE                                                                                | AKT1  | Toll-like receptor signaling pathway | Direct |
| GDC-0068                                                                                  | AKT1  | Toll-like receptor signaling pathway | Direct |
| EVEROLIMUS                                                                                | AKT1  | Toll-like receptor signaling pathway | Direct |
| AFURESERTIB HYDROCHLORIDE                                                                 | AKT1  | Toll-like receptor signaling pathway | Direct |
| AZD5363                                                                                   | AKT1  | Toll-like receptor signaling pathway | Direct |
| N/A                                                                                       | AKT1  | Toll-like receptor signaling pathway | Direct |
| TRICIRIBINE                                                                               | AKT1  | Toll-like receptor signaling pathway | Direct |
| AS703569                                                                                  | AKT1  | Toll-like receptor signaling pathway | Direct |
| MK-2206                                                                                   | AKT1  | Toll-like receptor signaling pathway | Direct |
| INOSITOL 1,3,4,5-TETRAKISPHOSPHATE                                                        | AKT1  | Toll-like receptor signaling pathway | Direct |
| ADENOSINE TRIPHOSPHATE                                                                    | AKT1  | Toll-like receptor signaling pathway | Direct |
| ARSENIC TRIOXIDE                                                                          | AKT1  | Toll-like receptor signaling pathway | Direct |
| 5-(5-CHLORO-7H-PYRROLO[2,3-D]PYRIMIDIN-4-YL)-4,5,6,7-TETRAHYDRO-1H-IMIDAZO[4,5-C]PYRIDINE | AKT1  | Toll-like receptor signaling pathway | Direct |
| N-[2-(5-METHYL-4H-1,2,4-TRIAZOL-3-YL)PHENYL]-7H-PYRROLO[2,3-D]PYRIMIDIN-4-AMINE           | AKT1  | Toll-like receptor signaling pathway | Direct |
| ARQ092                                                                                    | AKT1  | Toll-like receptor signaling pathway | Direct |
| NELFINAVIR                                                                                | AKT1  | Toll-like receptor signaling pathway | Direct |
| AMRINONE                                                                                  | TNF   | Toll-like receptor signaling pathway | Direct |
| INFLIXIMAB                                                                                | TNF   | Toll-like receptor signaling pathway | Direct |
| THALIDOMIDE                                                                               | TNF   | Toll-like receptor signaling pathway | Direct |
| CLENBUTEROL                                                                               | TNF   | Toll-like receptor signaling pathway | Direct |
| ADALIMUMAB                                                                                | TNF   | Toll-like receptor signaling pathway | Direct |
| ETANERCEPT                                                                                | TNF   | Toll-like receptor signaling pathway | Direct |
| CHLOROQUINE                                                                               | TNF   | Toll-like receptor signaling pathway | Direct |
| PRANLUKAST                                                                                | TNF   | Toll-like receptor signaling pathway | Direct |
| GLUCOSAMINE                                                                               | TNF   | Toll-like receptor signaling pathway | Direct |
| CERTOLIZUMAB PEGOL                                                                        | TNF   | Toll-like receptor signaling pathway | Direct |
| GOLIMUMAB                                                                                 | TNF   | Toll-like receptor signaling pathway | Direct |
| CARBAMAZEPINE                                                                             | TNF   | Toll-like receptor signaling pathway | Direct |
| ABACAVIR                                                                                  | TNF   | Toll-like receptor signaling pathway | Direct |
| LENALIDOMIDE                                                                              | TNF   | Toll-like receptor signaling pathway | Direct |

|                                                    |      |                                      |          |
|----------------------------------------------------|------|--------------------------------------|----------|
| GENZ29155                                          | TNF  | Toll-like receptor signaling pathway | Direct   |
| CYTOFAB                                            | TNF  | Toll-like receptor signaling pathway | Direct   |
| CERTOLIZUMAB                                       | TNF  | Toll-like receptor signaling pathway | Direct   |
| RDP58                                              | TNF  | Toll-like receptor signaling pathway | Direct   |
| AN0128                                             | TNF  | Toll-like receptor signaling pathway | Direct   |
| ART621                                             | TNF  | Toll-like receptor signaling pathway | Direct   |
| CELASTROL                                          | TNF  | Toll-like receptor signaling pathway | Direct   |
| TALACTOFERRIN ALFA                                 | TNF  | Toll-like receptor signaling pathway | Direct   |
| RDP-58                                             | TNF  | Toll-like receptor signaling pathway | Direct   |
| PENTOXIFYLLINE                                     | TNF  | Toll-like receptor signaling pathway | Direct   |
| IP-751                                             | TNF  | Toll-like receptor signaling pathway | Direct   |
| CRX-191                                            | TNF  | Toll-like receptor signaling pathway | Direct   |
| PIRFENIDONE                                        | TNF  | Toll-like receptor signaling pathway | Direct   |
| TGAAC-94                                           | TNF  | Toll-like receptor signaling pathway | Direct   |
| RISEDRONATE                                        | IL1B | Toll-like receptor signaling pathway | Direct   |
| TILUDRONATE                                        | IL1B | Toll-like receptor signaling pathway | Direct   |
| BISPHOSPHONATES                                    | IL1B | Toll-like receptor signaling pathway | Direct   |
| ETIDRONIC ACID                                     | IL1B | Toll-like receptor signaling pathway | Direct   |
| CLODRONATE                                         | IL1B | Toll-like receptor signaling pathway | Direct   |
| CANAKINUMAB                                        | IL1B | Toll-like receptor signaling pathway | Direct   |
| K-832                                              | IL1B | Toll-like receptor signaling pathway | Direct   |
| RILONACEPT                                         | IL1B | Toll-like receptor signaling pathway | Direct   |
| AMG108                                             | IL1B | Toll-like receptor signaling pathway | Direct   |
| CELASTROL                                          | IL1B | Toll-like receptor signaling pathway | Direct   |
| IBUDILAST                                          | IL1B | Toll-like receptor signaling pathway | Direct   |
| GALLIUM NITRATE                                    | IL1B | Toll-like receptor signaling pathway | Direct   |
| GLUCOSAMINE                                        | IL1B | Toll-like receptor signaling pathway | Direct   |
| MINOCYCLINE                                        | IL1B | Toll-like receptor signaling pathway | Direct   |
| IMIQUIMOD                                          | TLR8 | Toll-like receptor signaling pathway | Direct   |
| SURECN254984                                       | TLR8 | Toll-like receptor signaling pathway | Direct   |
| CPG 52364                                          | TLR8 | Toll-like receptor signaling pathway | Direct   |
| RESIQUIMOD                                         | TLR8 | Toll-like receptor signaling pathway | Direct   |
| TUMOR NECROSIS FACTOR ALPHA (TNF-ALPHA) INHIBITORS | IL6  | Toll-like receptor signaling pathway | Direct   |
| GINSENG                                            | IL6  | Toll-like receptor signaling pathway | Direct   |
| ALD518                                             | IL6  | Toll-like receptor signaling pathway | Direct   |
| FLUTICASONE PROPIONATE                             | CD14 | Toll-like receptor signaling pathway | Direct   |
| CYCLOPHOSPHAMIDE                                   | IL8  | Toll-like receptor signaling pathway | Direct   |
| BEVACIZUMAB                                        | IL8  | Toll-like receptor signaling pathway | Direct   |
| FONTOLIZUMAB                                       | IFNG | Type I diabetes mellitus             | Indirect |
| FUMARIC ACID                                       | IFNG | Type I diabetes mellitus             | Indirect |
| CRX-191                                            | IFNG | Type I diabetes mellitus             | Indirect |
| OLSALAZINE                                         | IFNG | Type I diabetes mellitus             | Indirect |

|                                                                                                                                                           |          |                          |          |
|-----------------------------------------------------------------------------------------------------------------------------------------------------------|----------|--------------------------|----------|
| GLUCOSAMINE                                                                                                                                               | IFNG     | Type I diabetes mellitus | Indirect |
| CARBAMAZEPINE                                                                                                                                             | HLA-A    | Type I diabetes mellitus | Indirect |
| 3-INDOLEBUTYRIC ACID                                                                                                                                      | HLA-A    | Type I diabetes mellitus | Indirect |
| ABACAVIR                                                                                                                                                  | HLA-B    | Type I diabetes mellitus | Indirect |
| PHENYTOIN                                                                                                                                                 | HLA-B    | Type I diabetes mellitus | Indirect |
| CARBAMAZEPINE                                                                                                                                             | HLA-B    | Type I diabetes mellitus | Indirect |
| N-FORMYLMETHIONINE                                                                                                                                        | HLA-B    | Type I diabetes mellitus | Indirect |
| MVA-MUC1-IL2                                                                                                                                              | IL2      | Type I diabetes mellitus | Indirect |
| (1H-INDOL-3-YL)-(2-MERCAPTO-ETHOXYIMINO)-ACETIC ACID                                                                                                      | IL2      | Type I diabetes mellitus | Indirect |
| 2-[2-(2-CYCLOHEXYL-2-GUANIDINO-ACETYLAMINO)-ACETYLAMINO]-N-(3-MERCAPTO-PROPYL)-PROPIONAMIDE                                                               | IL2      | Type I diabetes mellitus | Indirect |
| (R)-N-[2-[1-(AMINOIMINOMETHYL)-3-PIPERIDINYL]-1-OXOETHYL]-4-(PHENYLETHYNYL)-L-PHENYLALANINE METHYLESTER                                                   | IL2      | Type I diabetes mellitus | Indirect |
| SP4160                                                                                                                                                    | IL2      | Type I diabetes mellitus | Indirect |
| 3-MERCAPTO-1-(1,3,4,9-TETRAHYDRO-B-CARBOLIN-2-YL)-PROPAN-1-ONE                                                                                            | IL2      | Type I diabetes mellitus | Indirect |
| SP2456                                                                                                                                                    | IL2      | Type I diabetes mellitus | Indirect |
| 5-[2,3-DICHLORO-4-(5-{1-[2-(2-GUANIDINO-4-METHYL-PENTANOYLAMINO)-ACETYL]-PIPERIDIN-4-YL}-1-METHYL-1H-PYRAZOL-3-YL)-PHENOXYMETHYL]-FURAN-2-CARBOXYLIC ACID | IL2      | Type I diabetes mellitus | Indirect |
| INFLIXIMAB                                                                                                                                                | LTA      | Type I diabetes mellitus | Indirect |
| ETANERCEPT                                                                                                                                                | LTA      | Type I diabetes mellitus | Indirect |
| ADALIMUMAB                                                                                                                                                | LTA      | Type I diabetes mellitus | Indirect |
| CARBAMAZEPINE                                                                                                                                             | LTA      | Type I diabetes mellitus | Indirect |
| ANTI-LT ALPHA                                                                                                                                             | LTA      | Type I diabetes mellitus | Indirect |
| GLATIRAMER ACETATE                                                                                                                                        | HLA-DRB1 | Type I diabetes mellitus | Indirect |
| USTEKINUMAB                                                                                                                                               | IL12B    | Type I diabetes mellitus | Indirect |
| 5-MERCAPTO-2-NITRO-BENZOIC ACID                                                                                                                           | IL12B    | Type I diabetes mellitus | Indirect |
| ALPHA-D-MANNOSE                                                                                                                                           | IL12B    | Type I diabetes mellitus | Indirect |
| AMRINONE                                                                                                                                                  | TNF      | Type I diabetes mellitus | Indirect |
| INFLIXIMAB                                                                                                                                                | TNF      | Type I diabetes mellitus | Indirect |
| THALIDOMIDE                                                                                                                                               | TNF      | Type I diabetes mellitus | Indirect |
| CLENBUTEROL                                                                                                                                               | TNF      | Type I diabetes mellitus | Indirect |
| ADALIMUMAB                                                                                                                                                | TNF      | Type I diabetes mellitus | Indirect |
| ETANERCEPT                                                                                                                                                | TNF      | Type I diabetes mellitus | Indirect |
| CHLOROQUINE                                                                                                                                               | TNF      | Type I diabetes mellitus | Indirect |

|                    |          |                          |          |
|--------------------|----------|--------------------------|----------|
| PRANLUKAST         | TNF      | Type I diabetes mellitus | Indirect |
| GLUCOSAMINE        | TNF      | Type I diabetes mellitus | Indirect |
| CERTOLIZUMAB PEGOL | TNF      | Type I diabetes mellitus | Indirect |
| GOLIMUMAB          | TNF      | Type I diabetes mellitus | Indirect |
| CARBAMAZEPINE      | TNF      | Type I diabetes mellitus | Indirect |
| ABACAVIR           | TNF      | Type I diabetes mellitus | Indirect |
| LENALIDOMIDE       | TNF      | Type I diabetes mellitus | Indirect |
| GENZ29155          | TNF      | Type I diabetes mellitus | Indirect |
| CYTOFAB            | TNF      | Type I diabetes mellitus | Indirect |
| CERTOLIZUMAB       | TNF      | Type I diabetes mellitus | Indirect |
| RDP58              | TNF      | Type I diabetes mellitus | Indirect |
| AN0128             | TNF      | Type I diabetes mellitus | Indirect |
| ART621             | TNF      | Type I diabetes mellitus | Indirect |
| CELASTROL          | TNF      | Type I diabetes mellitus | Indirect |
| TALACTOFERRIN ALFA | TNF      | Type I diabetes mellitus | Indirect |
| RDP-58             | TNF      | Type I diabetes mellitus | Indirect |
| PENTOXIFYLLINE     | TNF      | Type I diabetes mellitus | Indirect |
| IP-751             | TNF      | Type I diabetes mellitus | Indirect |
| CRX-191            | TNF      | Type I diabetes mellitus | Indirect |
| PIRFENIDONE        | TNF      | Type I diabetes mellitus | Indirect |
| TGAAC-94           | TNF      | Type I diabetes mellitus | Indirect |
| RISEDRONATE        | IL1B     | Type I diabetes mellitus | Indirect |
| TILUDRONATE        | IL1B     | Type I diabetes mellitus | Indirect |
| BISPHOSPHONATES    | IL1B     | Type I diabetes mellitus | Indirect |
| ETIDRONIC ACID     | IL1B     | Type I diabetes mellitus | Indirect |
| CLODRONATE         | IL1B     | Type I diabetes mellitus | Indirect |
| CANAKINUMAB        | IL1B     | Type I diabetes mellitus | Indirect |
| K-832              | IL1B     | Type I diabetes mellitus | Indirect |
| RILONACEPT         | IL1B     | Type I diabetes mellitus | Indirect |
| AMG108             | IL1B     | Type I diabetes mellitus | Indirect |
| CELASTROL          | IL1B     | Type I diabetes mellitus | Indirect |
| IBUDILAST          | IL1B     | Type I diabetes mellitus | Indirect |
| GALLIUM NITRATE    | IL1B     | Type I diabetes mellitus | Indirect |
| GLUCOSAMINE        | IL1B     | Type I diabetes mellitus | Indirect |
| MINOCYCLINE        | IL1B     | Type I diabetes mellitus | Indirect |
| AMOXICILLIN        | HLA-DQB1 | Type I diabetes mellitus | Indirect |
| CLAVULANATE        | HLA-DQB1 | Type I diabetes mellitus | Indirect |
| INSULIN, PORCINE   | HLA-DQB1 | Type I diabetes mellitus | Indirect |
| INSULIN, PORCINE   | HLA-DQA2 | Type I diabetes mellitus | Indirect |
| INTERFERON BETA-1A | HLA-DQA1 | Type I diabetes mellitus | Indirect |
| INTERFERON BETA-1B | HLA-DQA1 | Type I diabetes mellitus | Indirect |
| RILONACEPT         | IL1A     | Type I diabetes mellitus | Indirect |

[a] From the DAVID (<http://david.abcc.ncifcrf.gov/>).
